# Supplementary material for: Selectivity in reduction of natural furanoheliangolides with Stryker's reagent
Source: Royal Society of Chemistry journal article supplement (doi:10.1039/c1ob05734k), 2011-01-01

# Selectivity in Reduction of Natural Furanoheliangolides with Stryker's Reagent

*Daiane Cristina Sass<sup>a</sup>, Vladimir Constantino Gomes Heleno<sup>b</sup>, Gustavo Oliveira Morais<sup>b</sup>,  
João Luis Callegari Lopes<sup>c</sup>, Norberto Peporine. Lopes<sup>c</sup>, Mauricio Gomes Constantino<sup>a\*</sup>*

*<sup>a</sup>Departamento de Química, Faculdade de Filosofia, Ciências e Letras de Ribeirão Preto,  
Universidade de São Paulo, Avenida dos Bandeirantes, 3900, 14040-901, Ribeirão Preto -  
SP, Brazil*

*<sup>b</sup>Núcleo de Pesquisas em Ciências Exatas e Tecnológicas, Universidade de Franca,  
Avenida Dr. Armando Salles Oliveira, 201, 14404-600, Franca – SP, Brazil*

*<sup>c</sup>Departamento de Física e Química, Faculdade de Ciências Farmacêuticas de Ribeirão  
Preto, Universidade de São Paulo, Avenida do Café s/n, 14040-903, Ribeirão Preto – SP,  
Brazil.*

\* mgconsta@usp.br

## Table of contents

General Information -----S2

<sup>1</sup>H NMR, <sup>13</sup>C NMR, gCOSY, gHMQC and gHMBC spectra for all compounds----- S3-S60

gNOESY spectra of compounds 11, 12, 14 and 16 -----S32, S38, S49 and S60

---

\* Corresponding author. Tel.: (+55)-16-3602-3747; fax: (+55)-16-3602-4838; e-mail: \* mgconsta@usp.br.

### **General Information**

The NMR spectra were recorded using a Bruker DPX-500 instrument (500 MHz  $^1\text{H}$  NMR and 125 MHz  $^{13}\text{C}$  NMR);  $\text{CDCl}_3$  and mixtures of  $\text{CDCl}_3$  and  $\text{DMSO-d}_6$  were used as solvent with TMS as internal standard. IR spectra were measured with a Perkin-Elmer Spectrum RX IFTIR System. High resolution mass spectra (HRMS) were obtained on an ESI-TOF Mass Spectrometer.

|                               |                |                             |                      |                              |         |
|-------------------------------|----------------|-----------------------------|----------------------|------------------------------|---------|
| <b>Acquisition Time (sec)</b> | 6.7633         | <b>Comment</b>              | Imported from UXNMR. | <b>Frequency (MHz)</b>       | 500.13  |
| <b>Nucleus</b>                | <sup>1</sup> H | <b>Number of Transients</b> | 16                   | <b>Original Points Count</b> | 32768   |
| <b>Pulse Sequence</b>         | zg30           | <b>Solvent</b>              | CHLOROFORM-D         | <b>Points Count</b>          | 32768   |
| <b>Temperature (degree C)</b> | 27.000         |                             |                      | <b>Sweep Width (Hz)</b>      | 4844.96 |

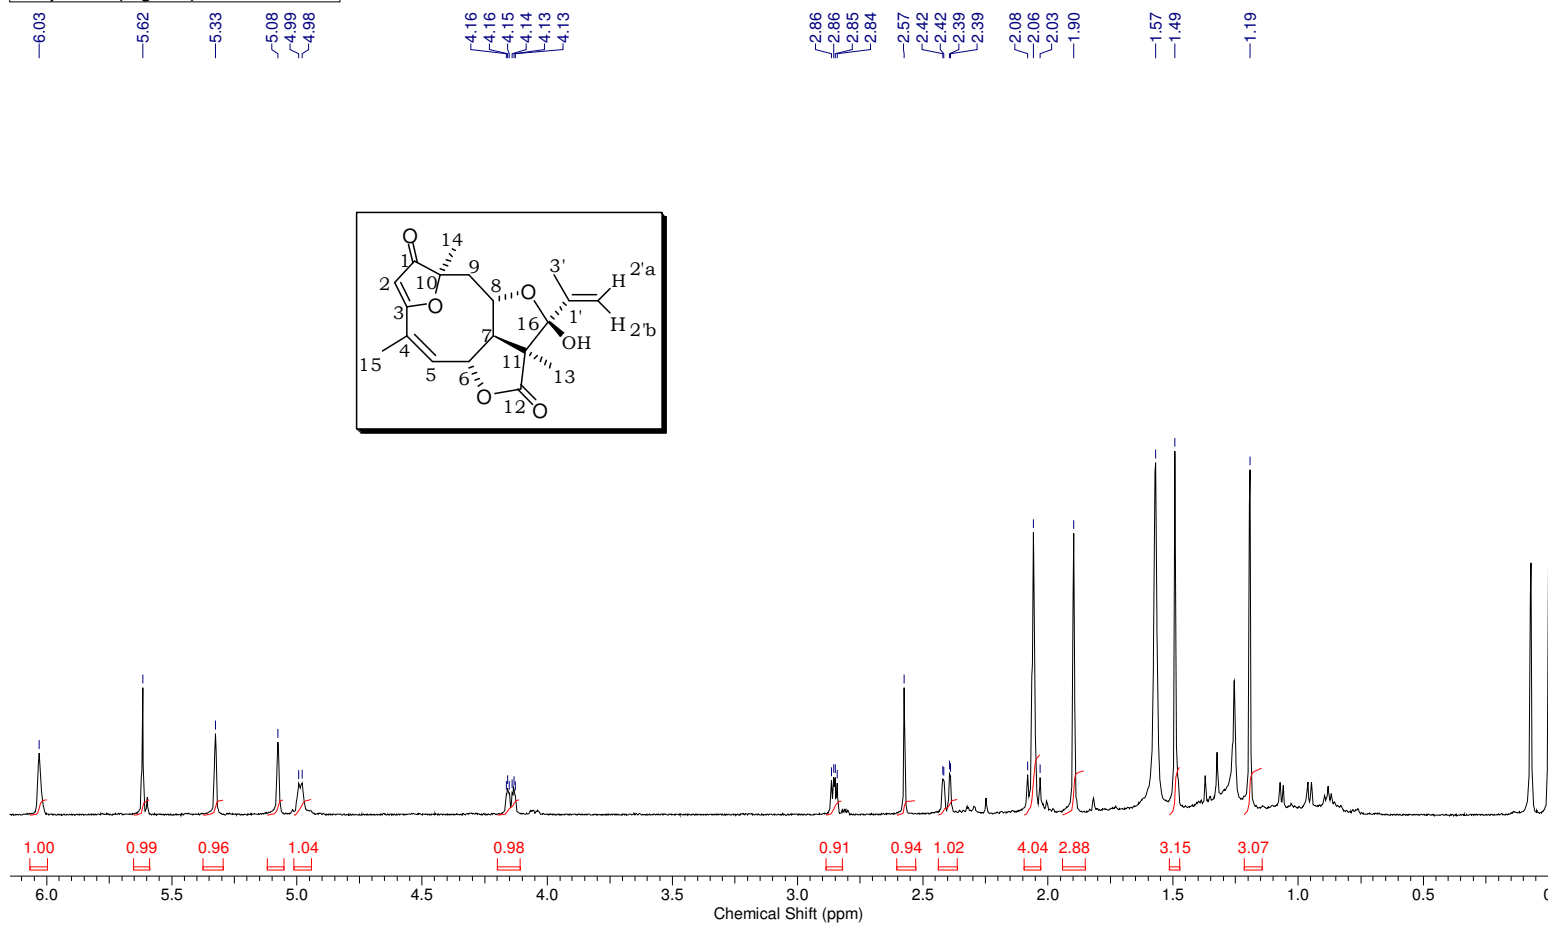

<sup>1</sup>H NMR (500 MHz) in CDCl<sub>3</sub> of compound **1**.

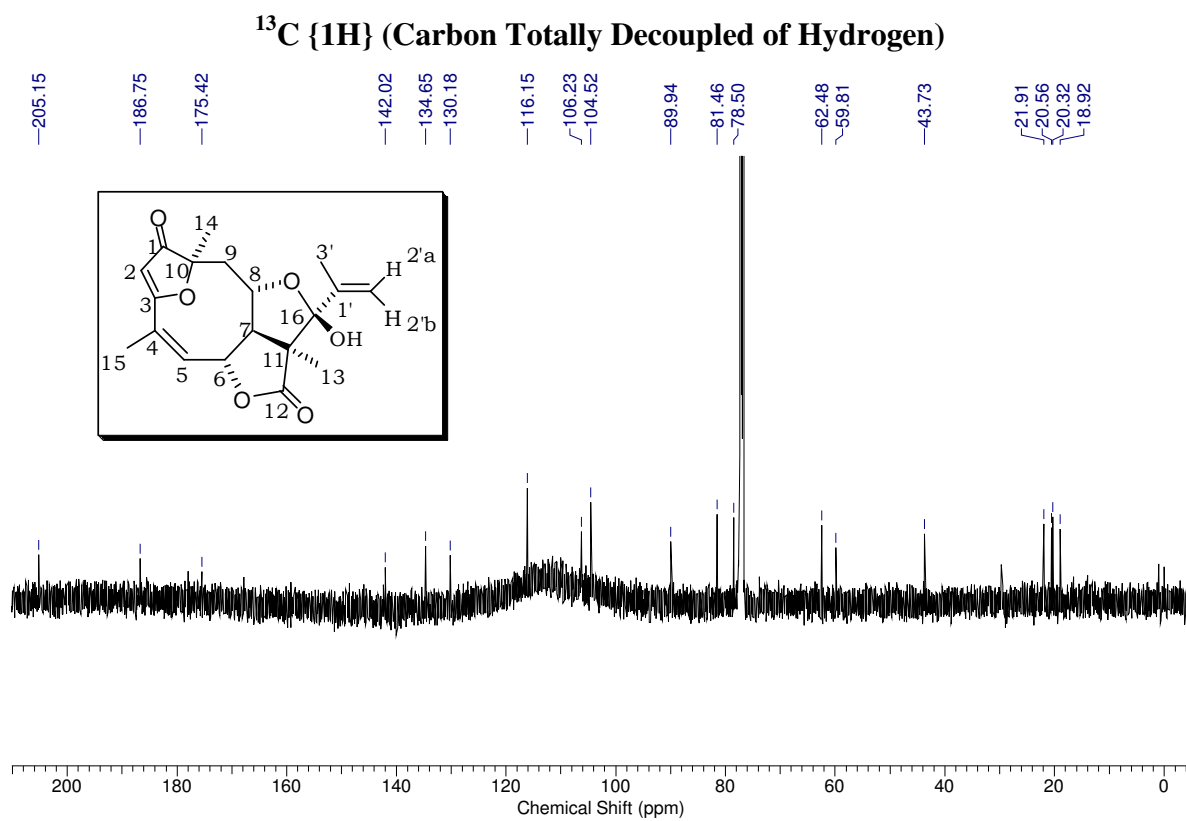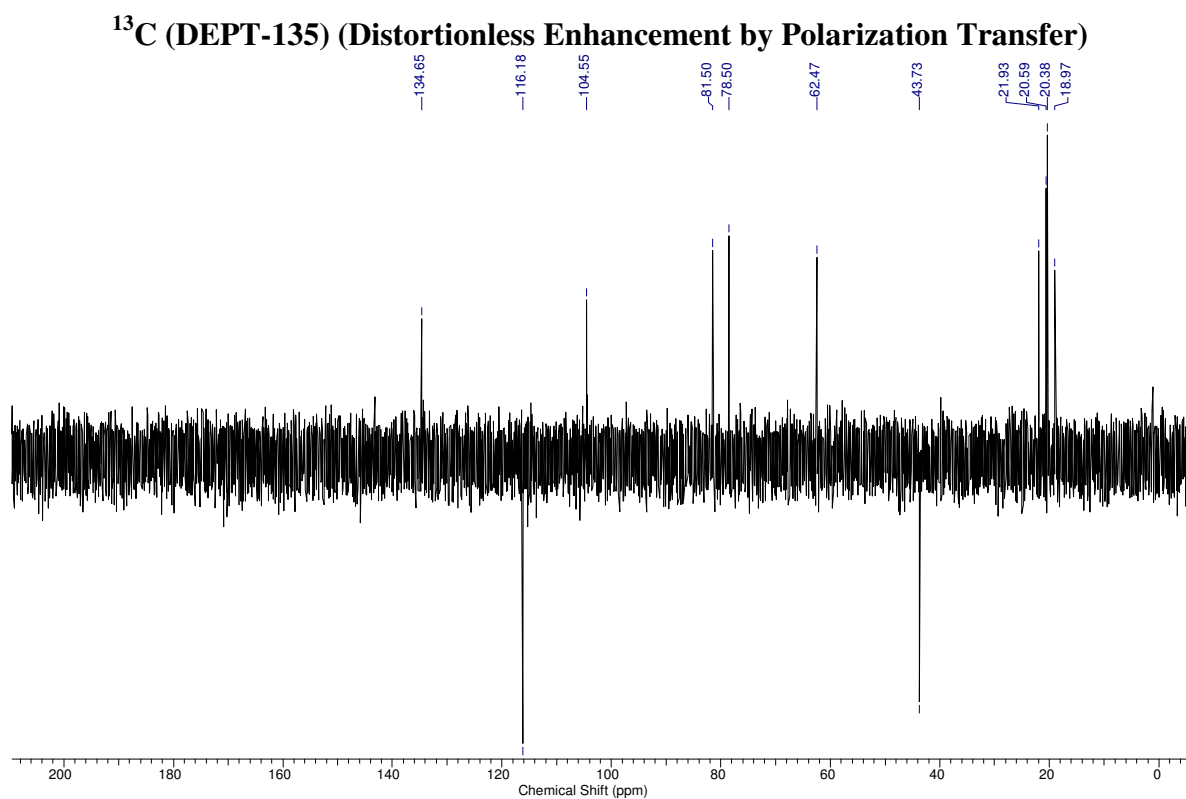

$^{13}\text{C}$  NMR (125 MHz) in  $\text{CDCl}_3$  of compound **1**

### gCOSY – Compound 1

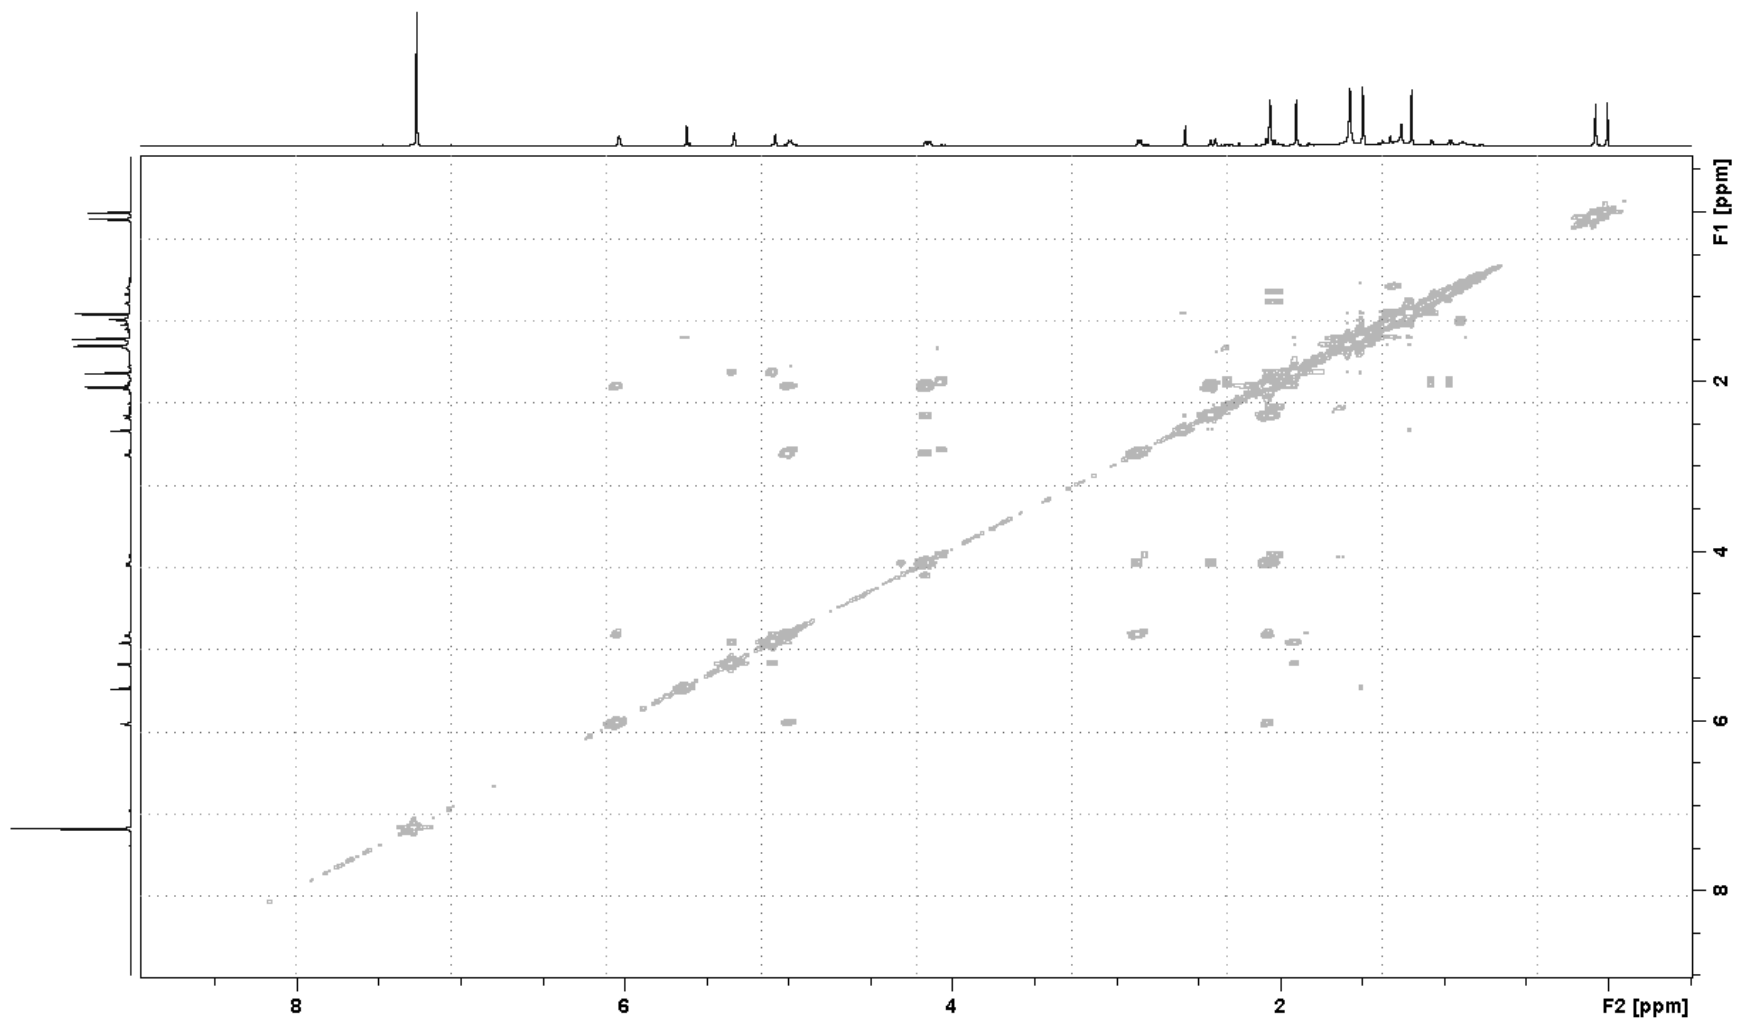

### gHMQC – Compound 1

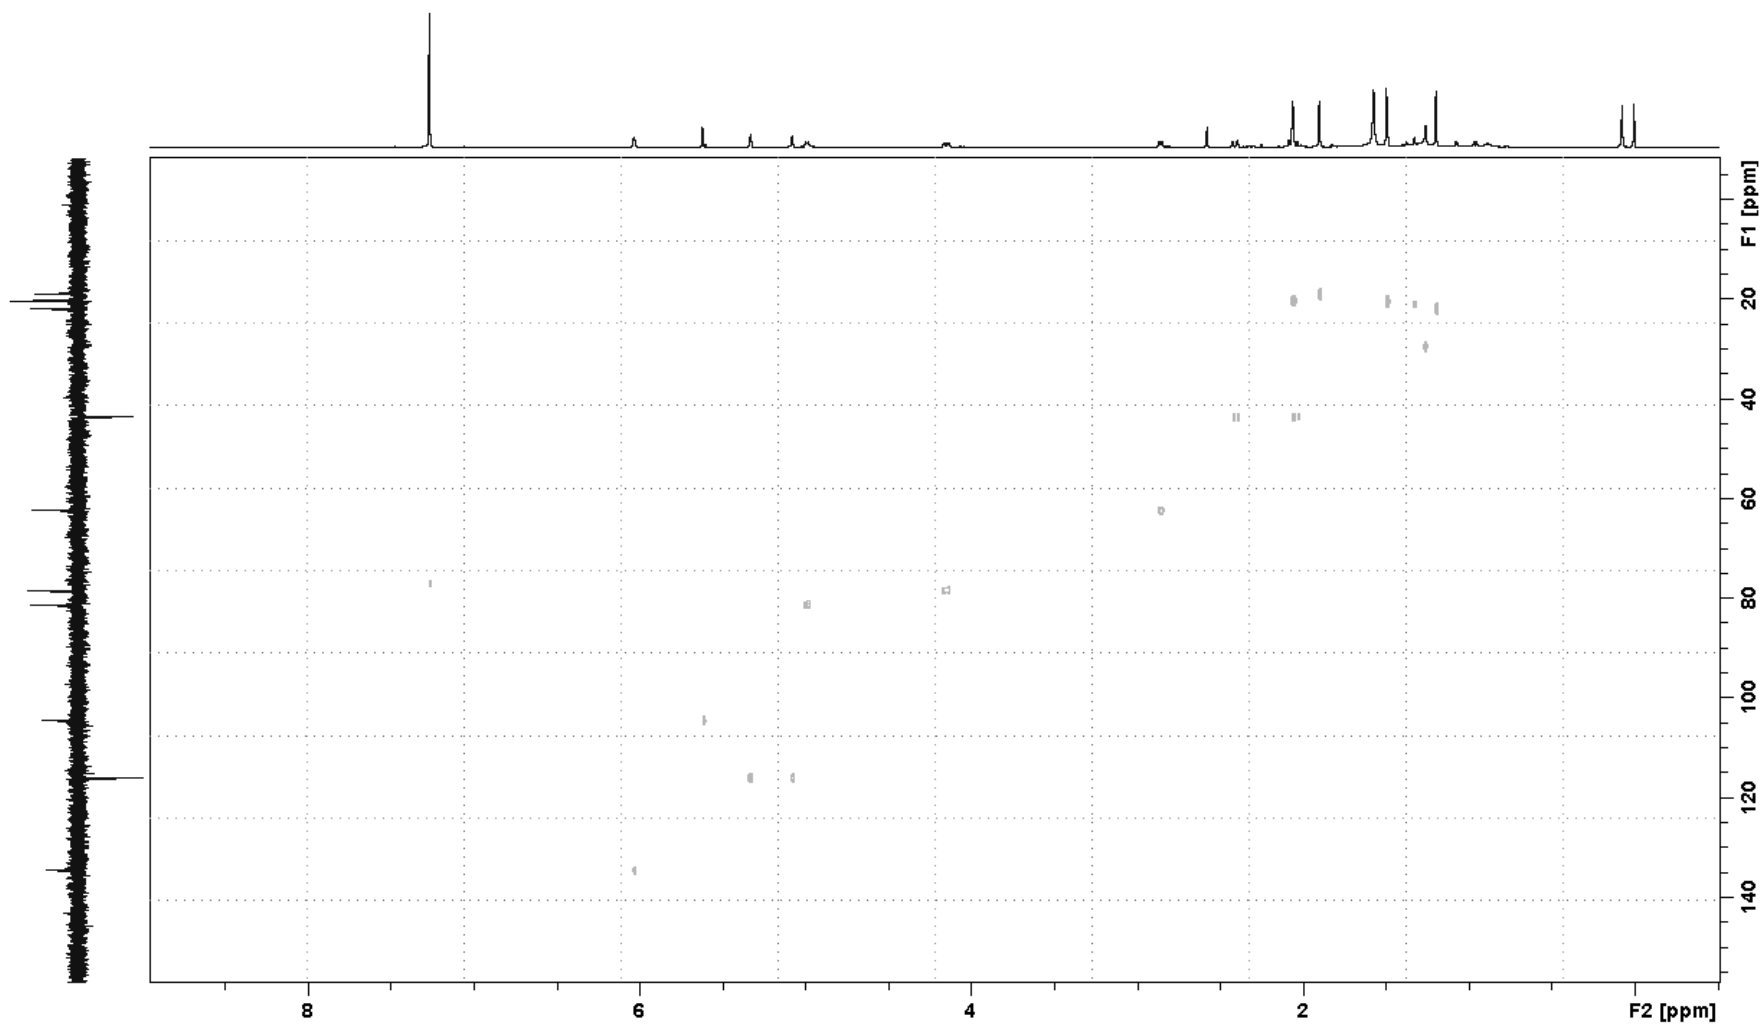

### gHMBC – Compound 1

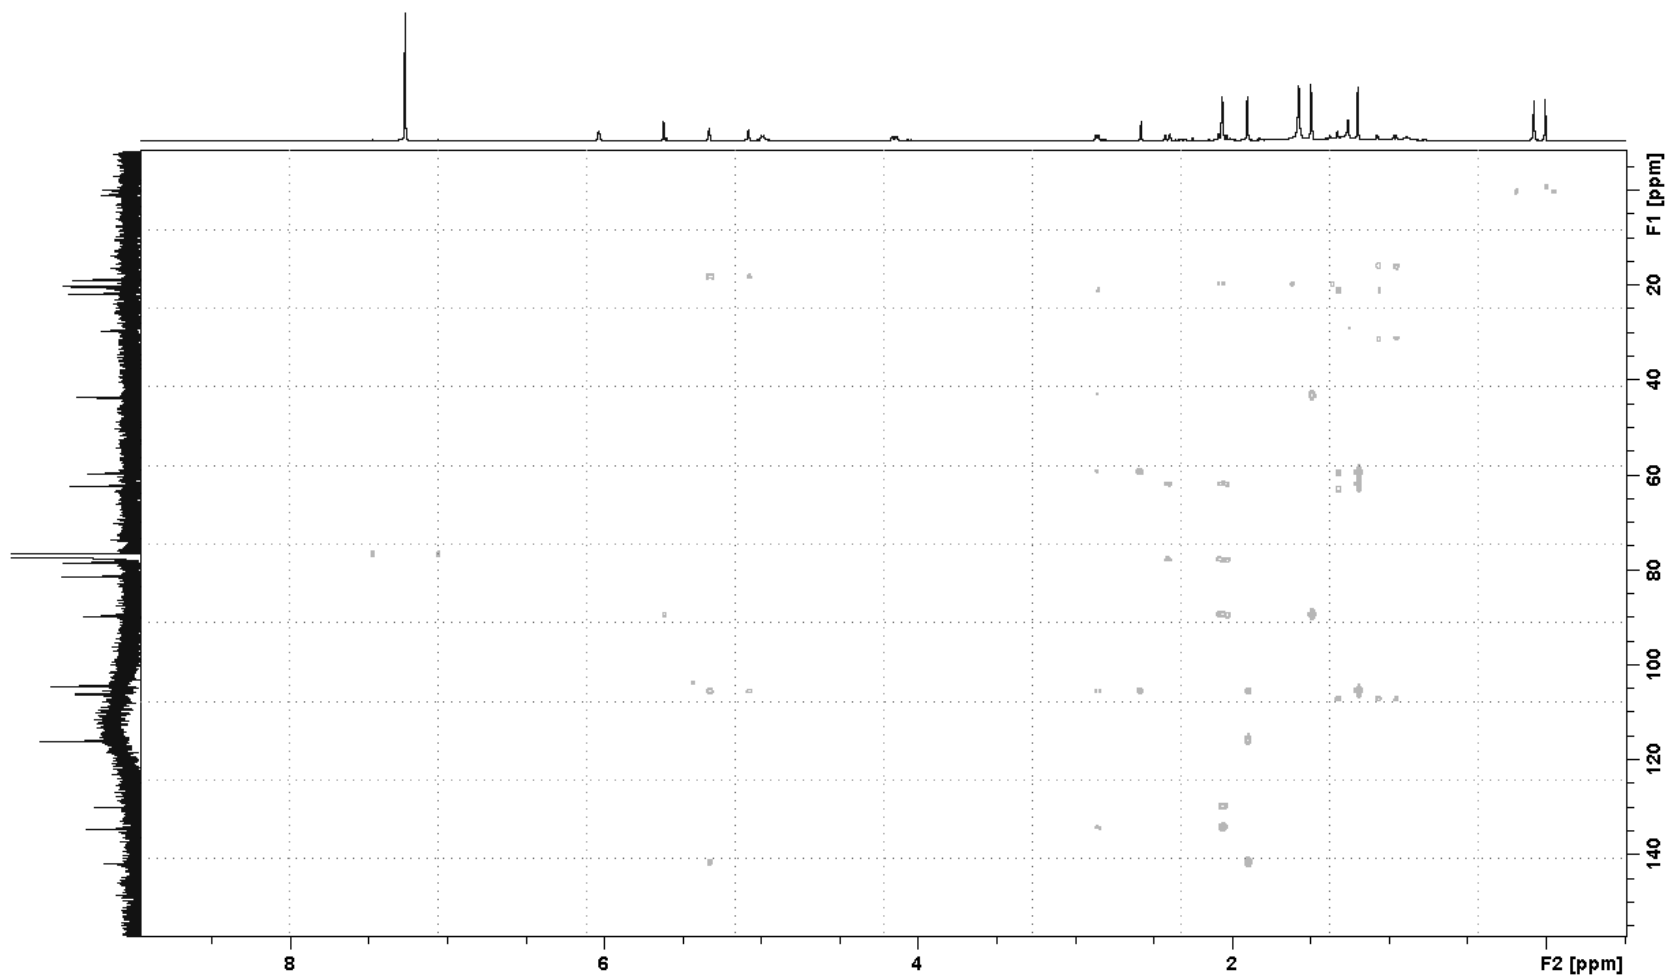

|                        |              |                  |                      |                      |      |
|------------------------|--------------|------------------|----------------------|----------------------|------|
| Acquisition Time (sec) | 3.2768       | Comment          | Imported from UXMNR. |                      |      |
| Frequency (MHz)        | 500.13       | Nucleus          | 1H                   | Number of Transients | 32   |
| Original Points Count  | 32768        | Points Count     | 32768                | Pulse Sequence       | zg30 |
| Solvent                | CHLOROFORM-D | Sweep Width (Hz) | 10000.00             |                      |      |
| Temperature (degree C) | 27.000       |                  |                      |                      |      |

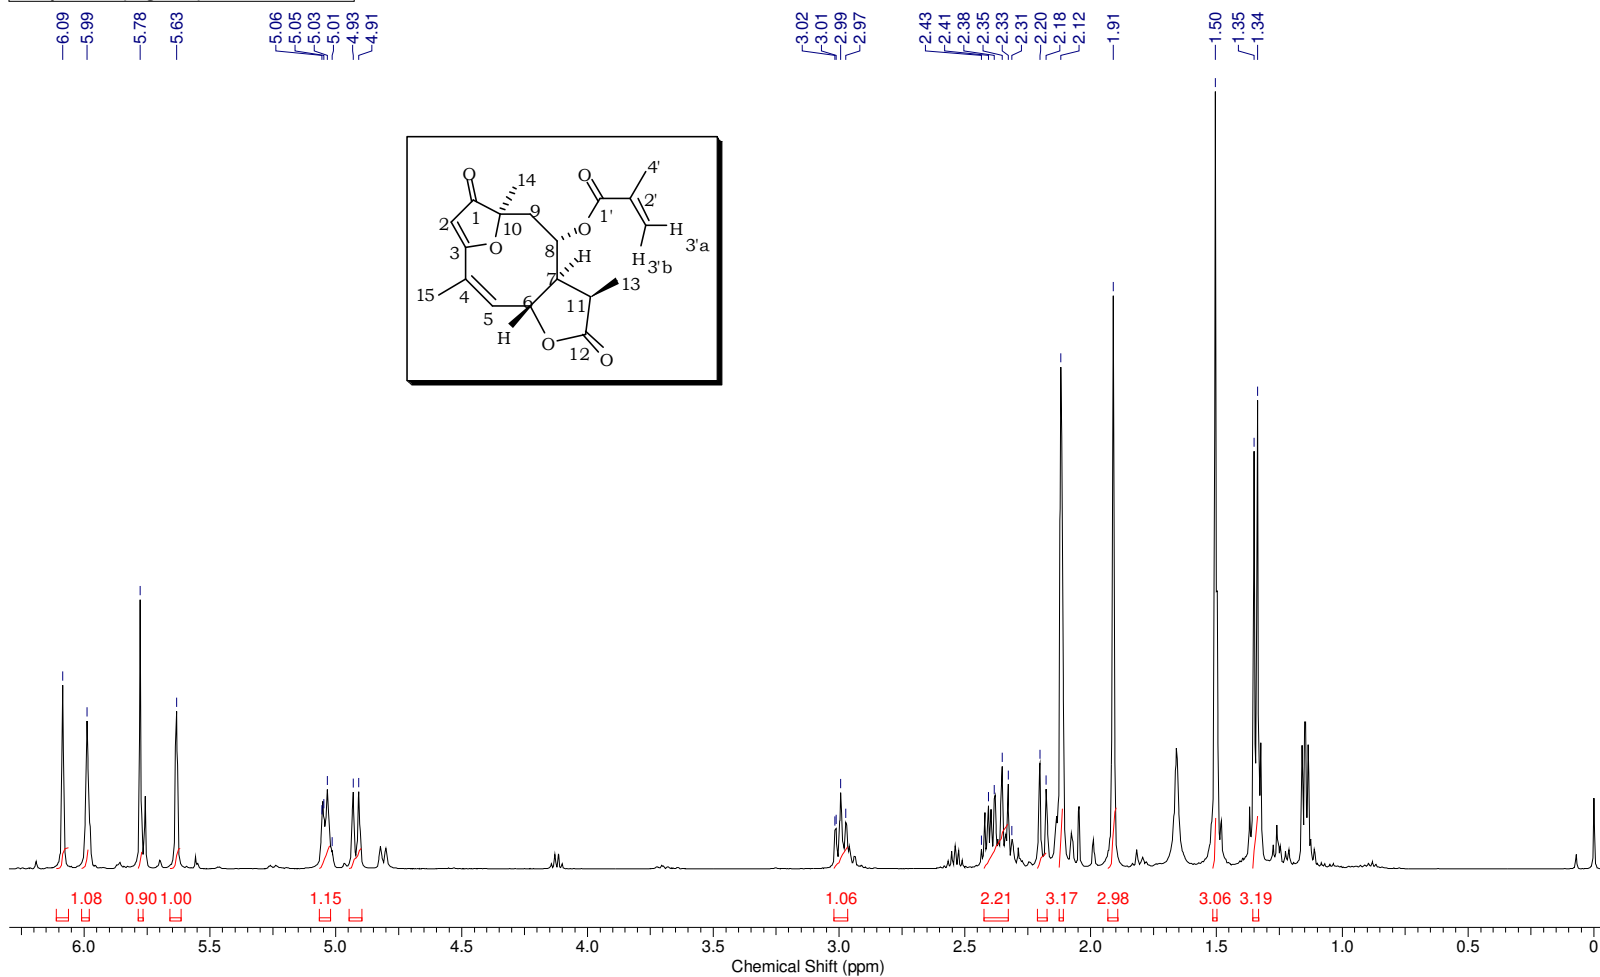

$^1\text{H}$  NMR (500 MHz) in  $\text{CDCl}_3$  of compound **7**.



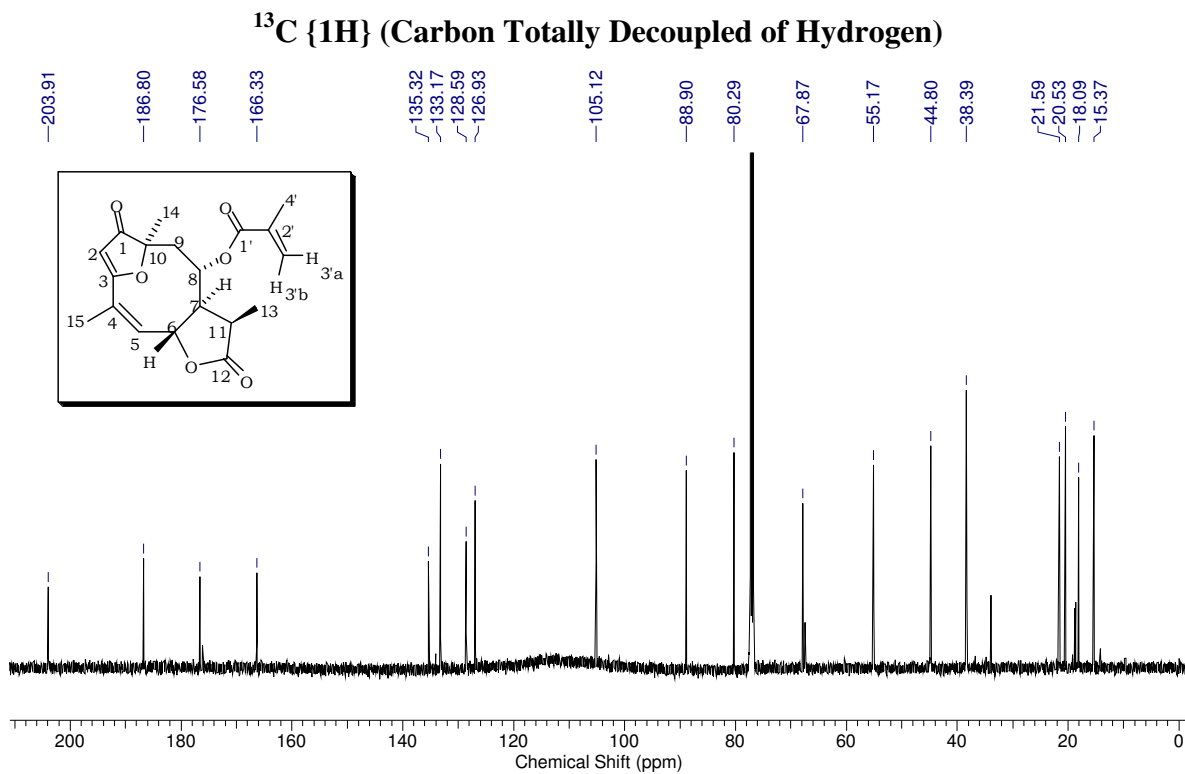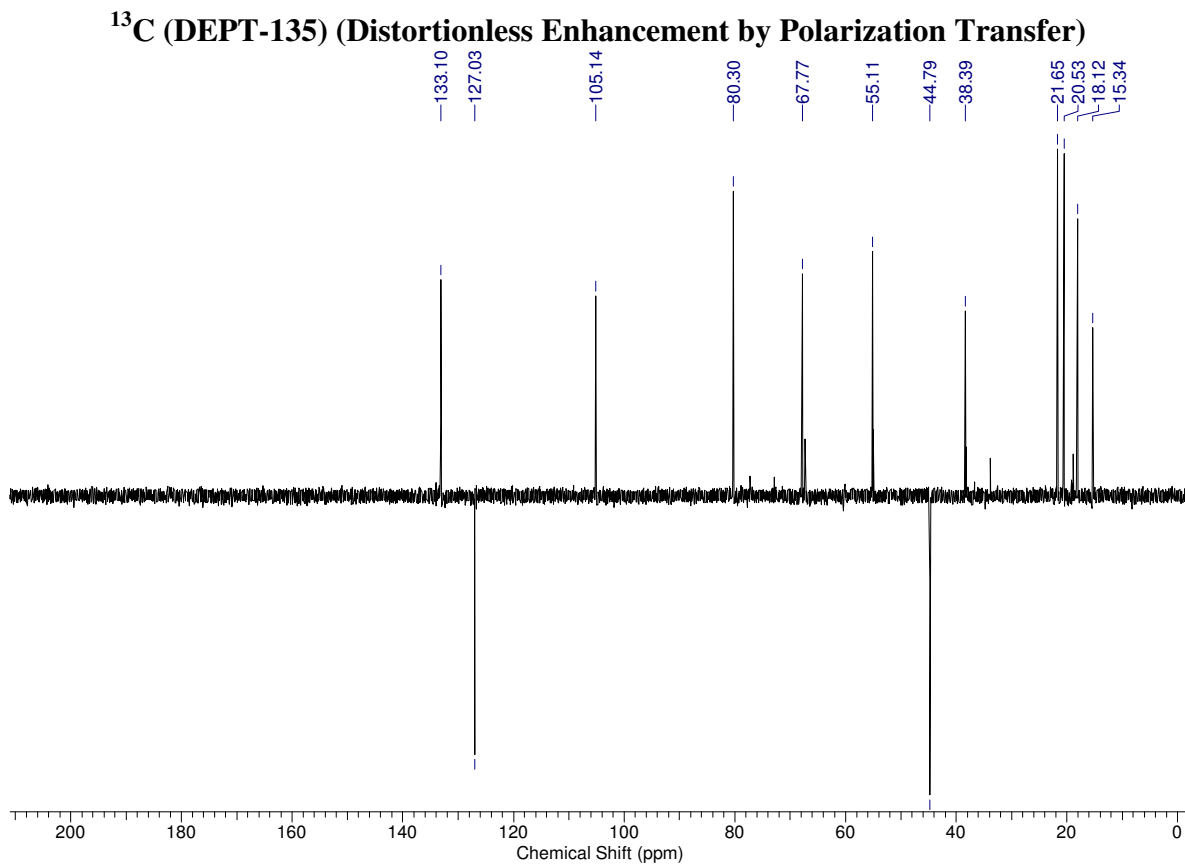

$^{13}\text{C}$  NMR (125 MHz) in  $\text{CDCl}_3$  of compound 7.

### gCOSY – Compound 7

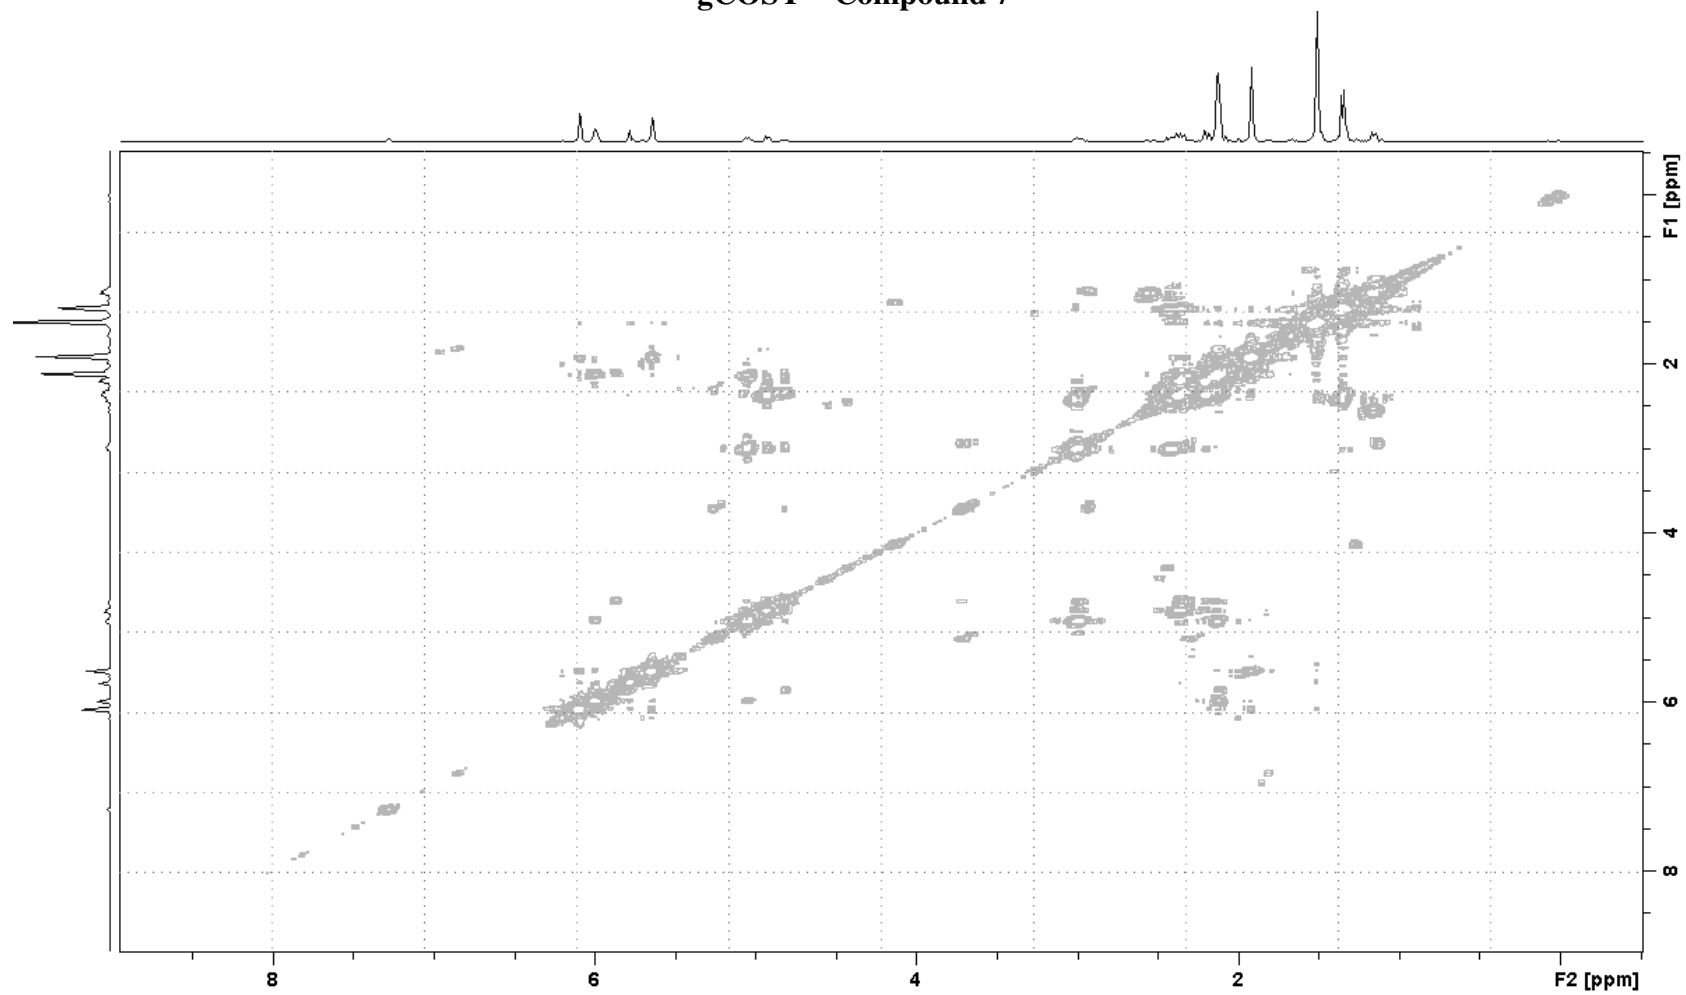

### gHMQC - Compound 7

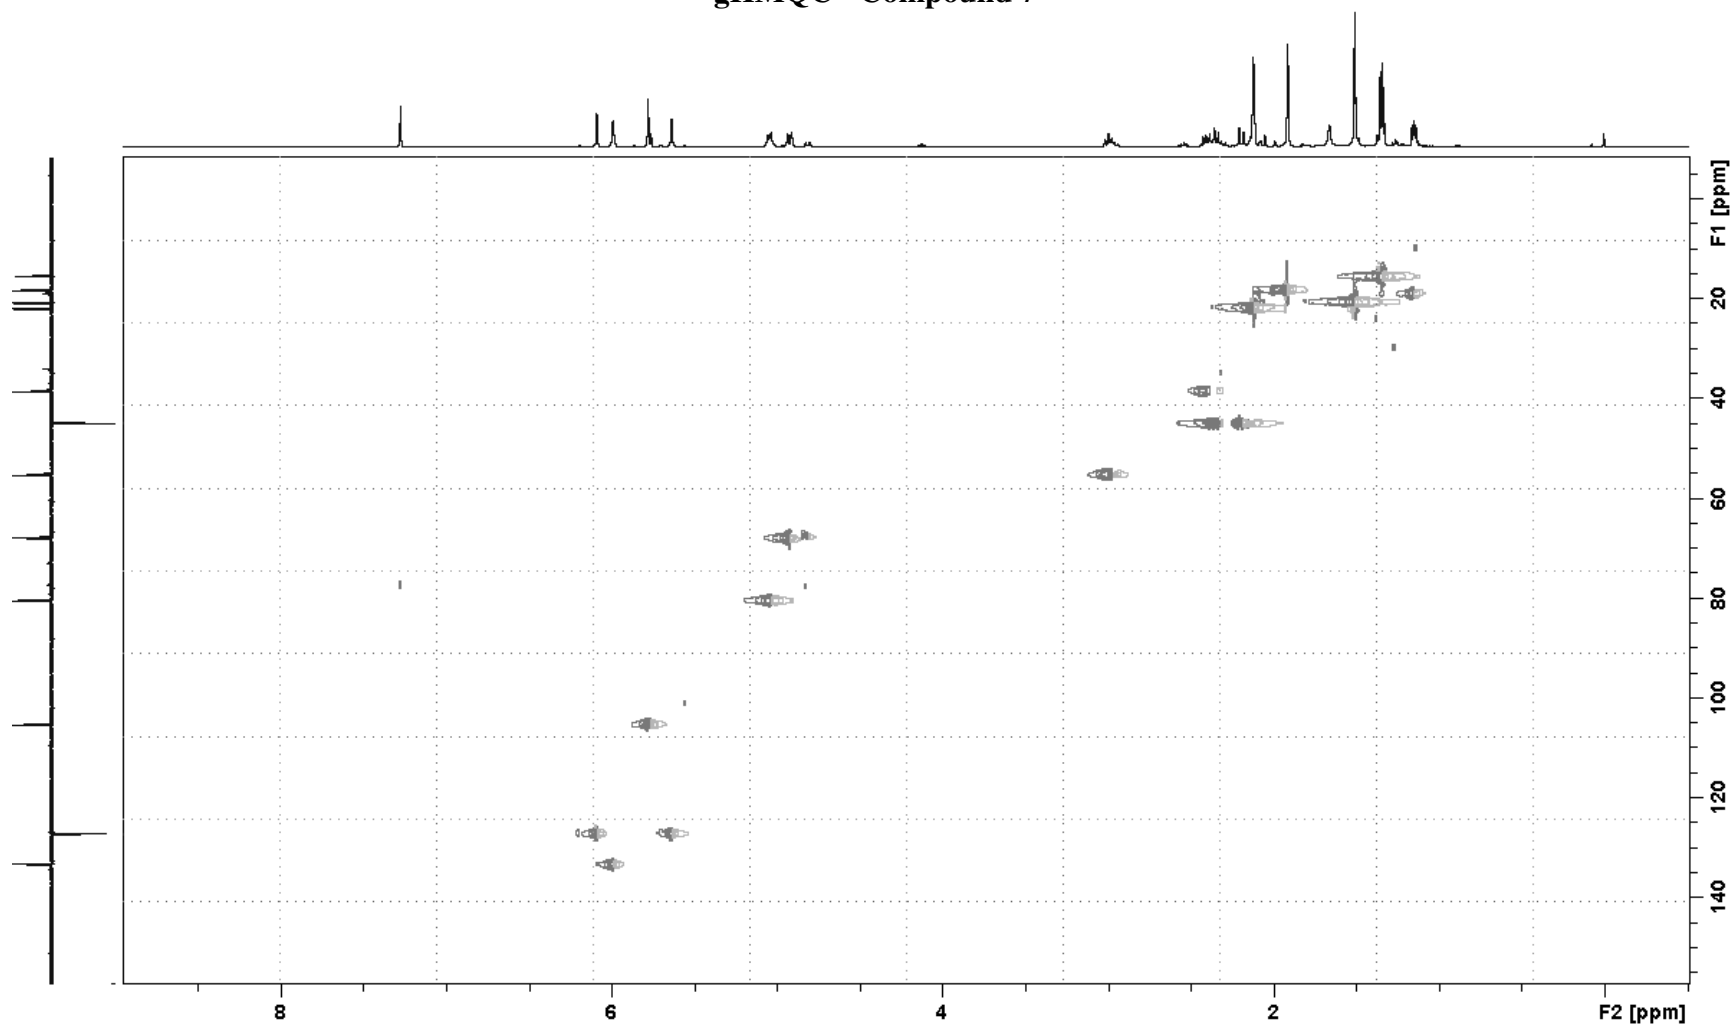

### gHMBC – Compound 7

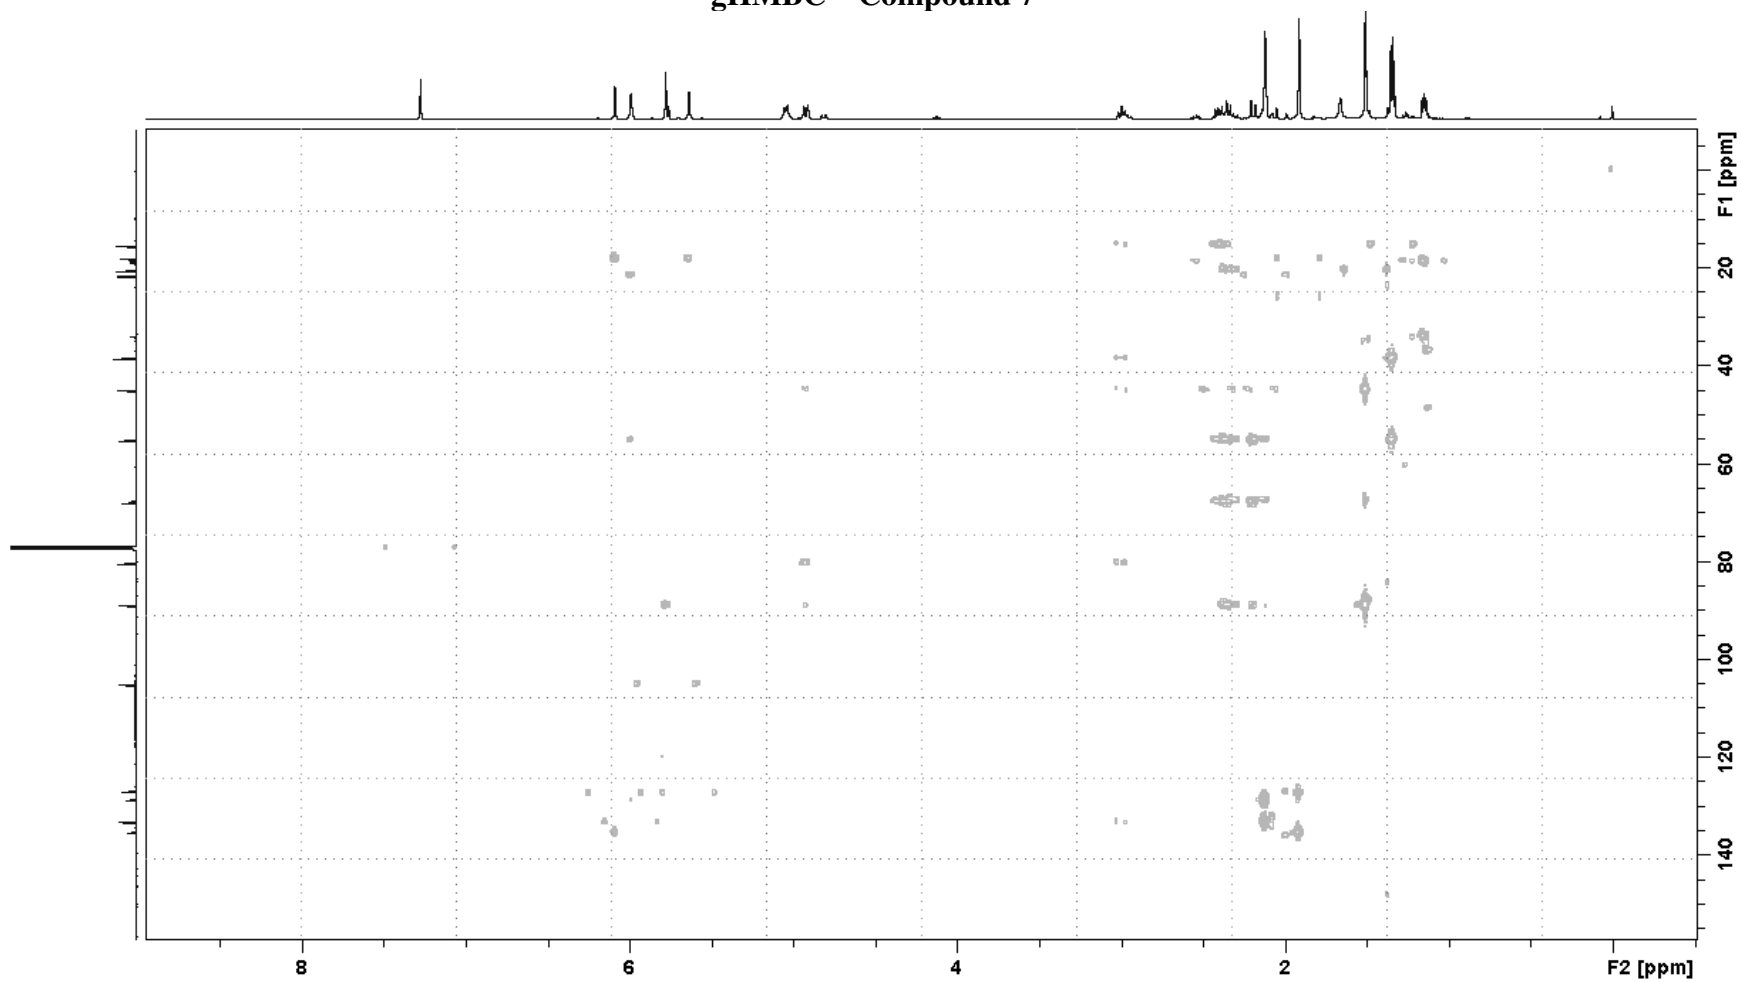

|                               |         |                               |                      |                              |              |
|-------------------------------|---------|-------------------------------|----------------------|------------------------------|--------------|
| <b>Acquisition Time (sec)</b> | 3.8535  | <b>Comment</b>                | Imported from UXNMR. | <b>Frequency (MHz)</b>       | 500.13       |
| <b>Nucleus</b>                | 1H      | <b>Number of Transients</b>   | 8                    | <b>Original Points Count</b> | 32768        |
| <b>Points Count</b>           | 32768   | <b>Pulse Sequence</b>         | zg30                 | <b>Solvent</b>               | CHLOROFORM-D |
| <b>Sweep Width (Hz)</b>       | 8503.40 | <b>Temperature (degree C)</b> | 27.000               |                              |              |

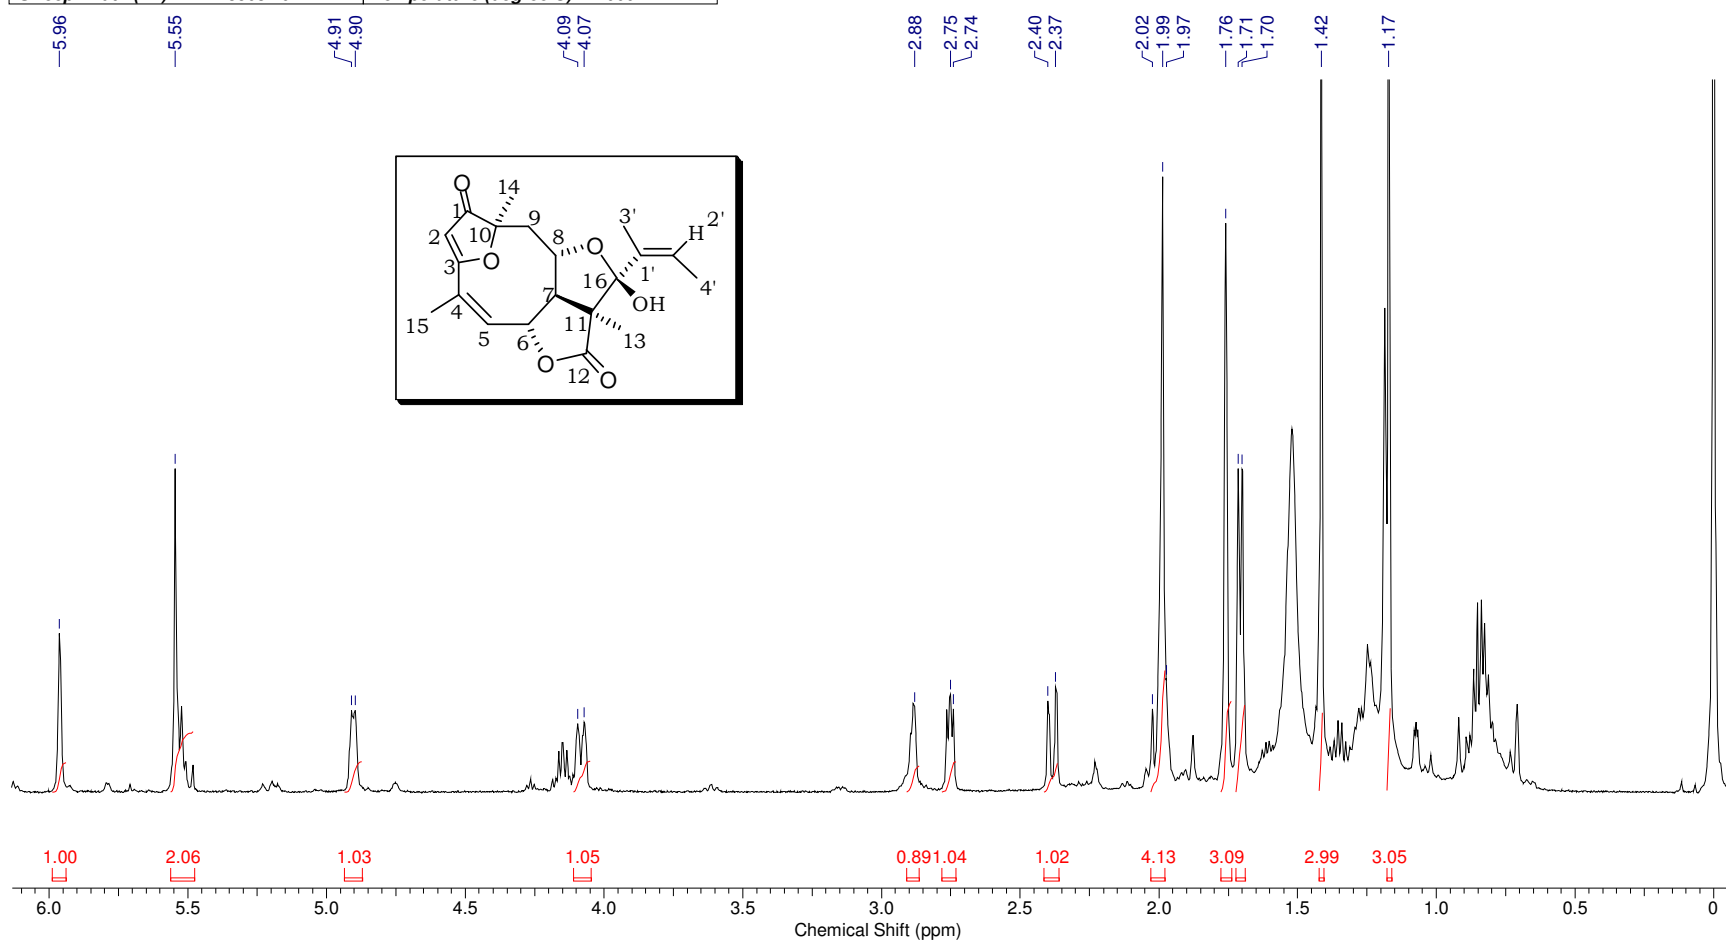

<sup>1</sup>H NMR (500 MHz) in CDCl<sub>3</sub> of compound 3.

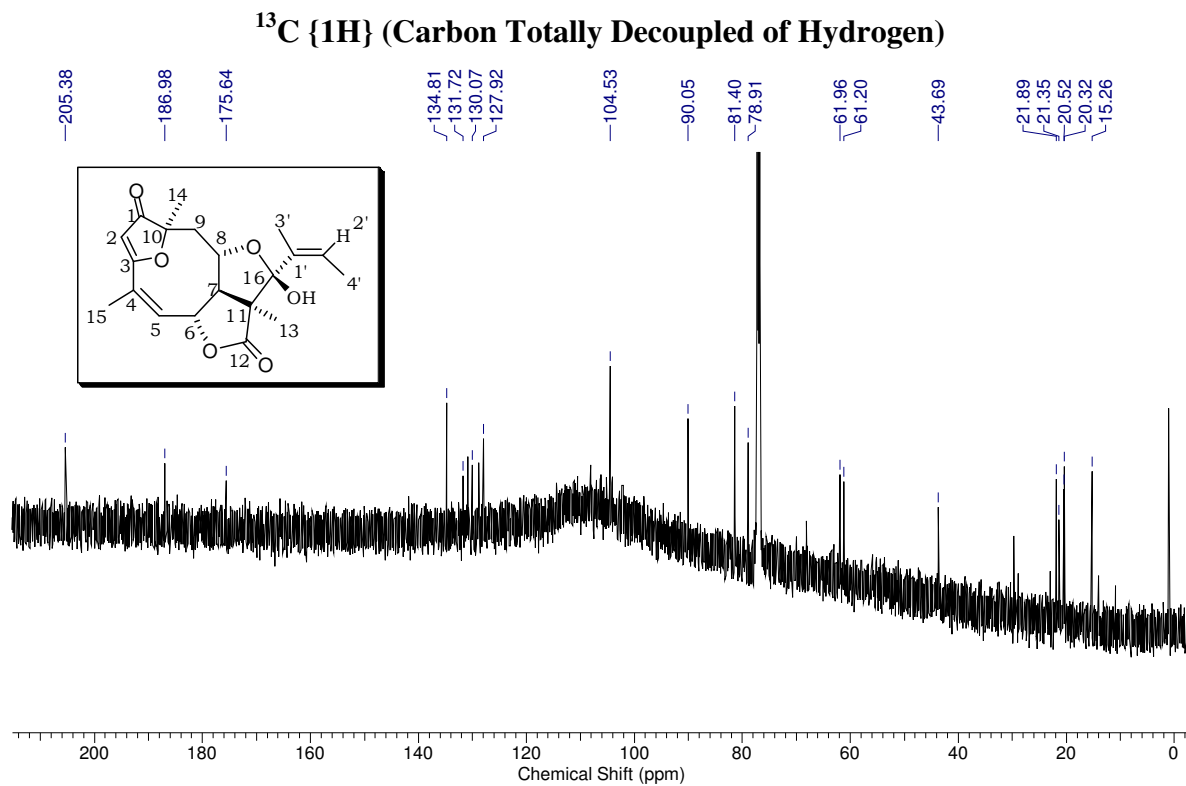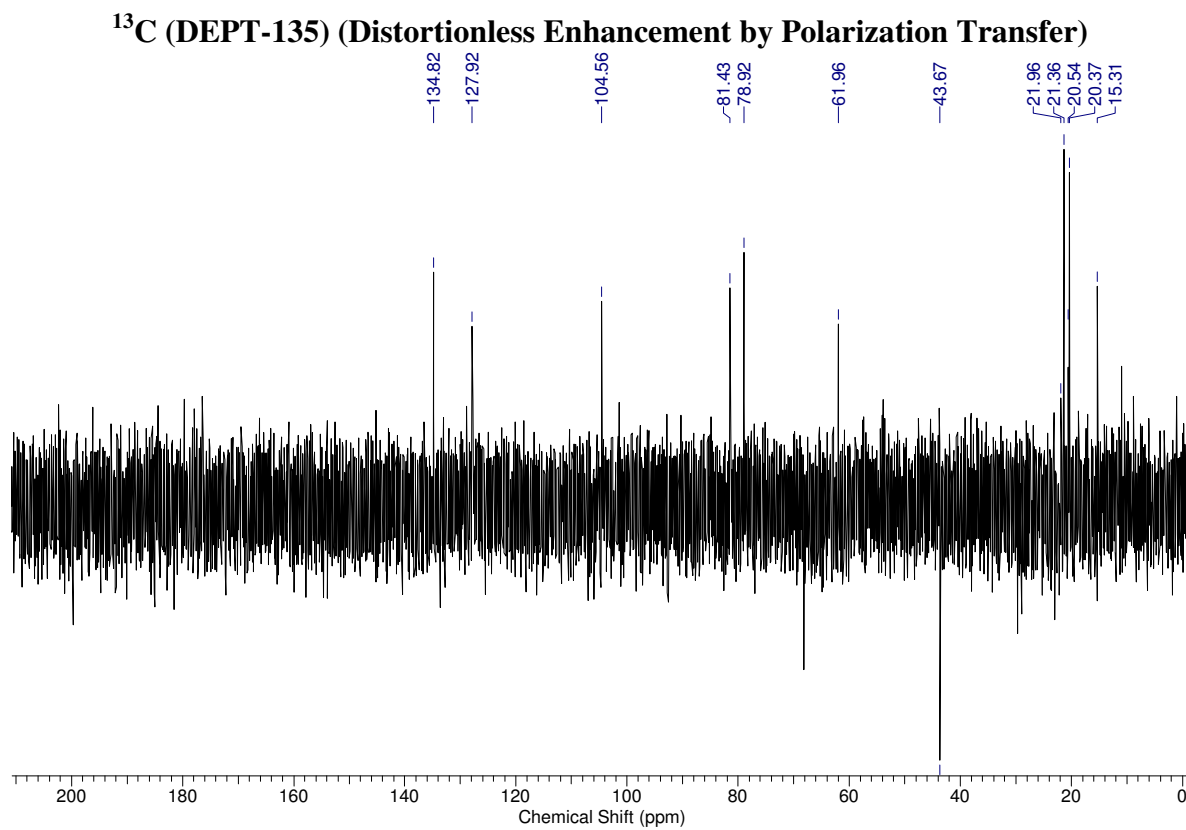

$^{13}\text{C}$  NMR (125 MHz) in  $\text{CDCl}_3$  of compound **3**

### gCOSY – Compound 3

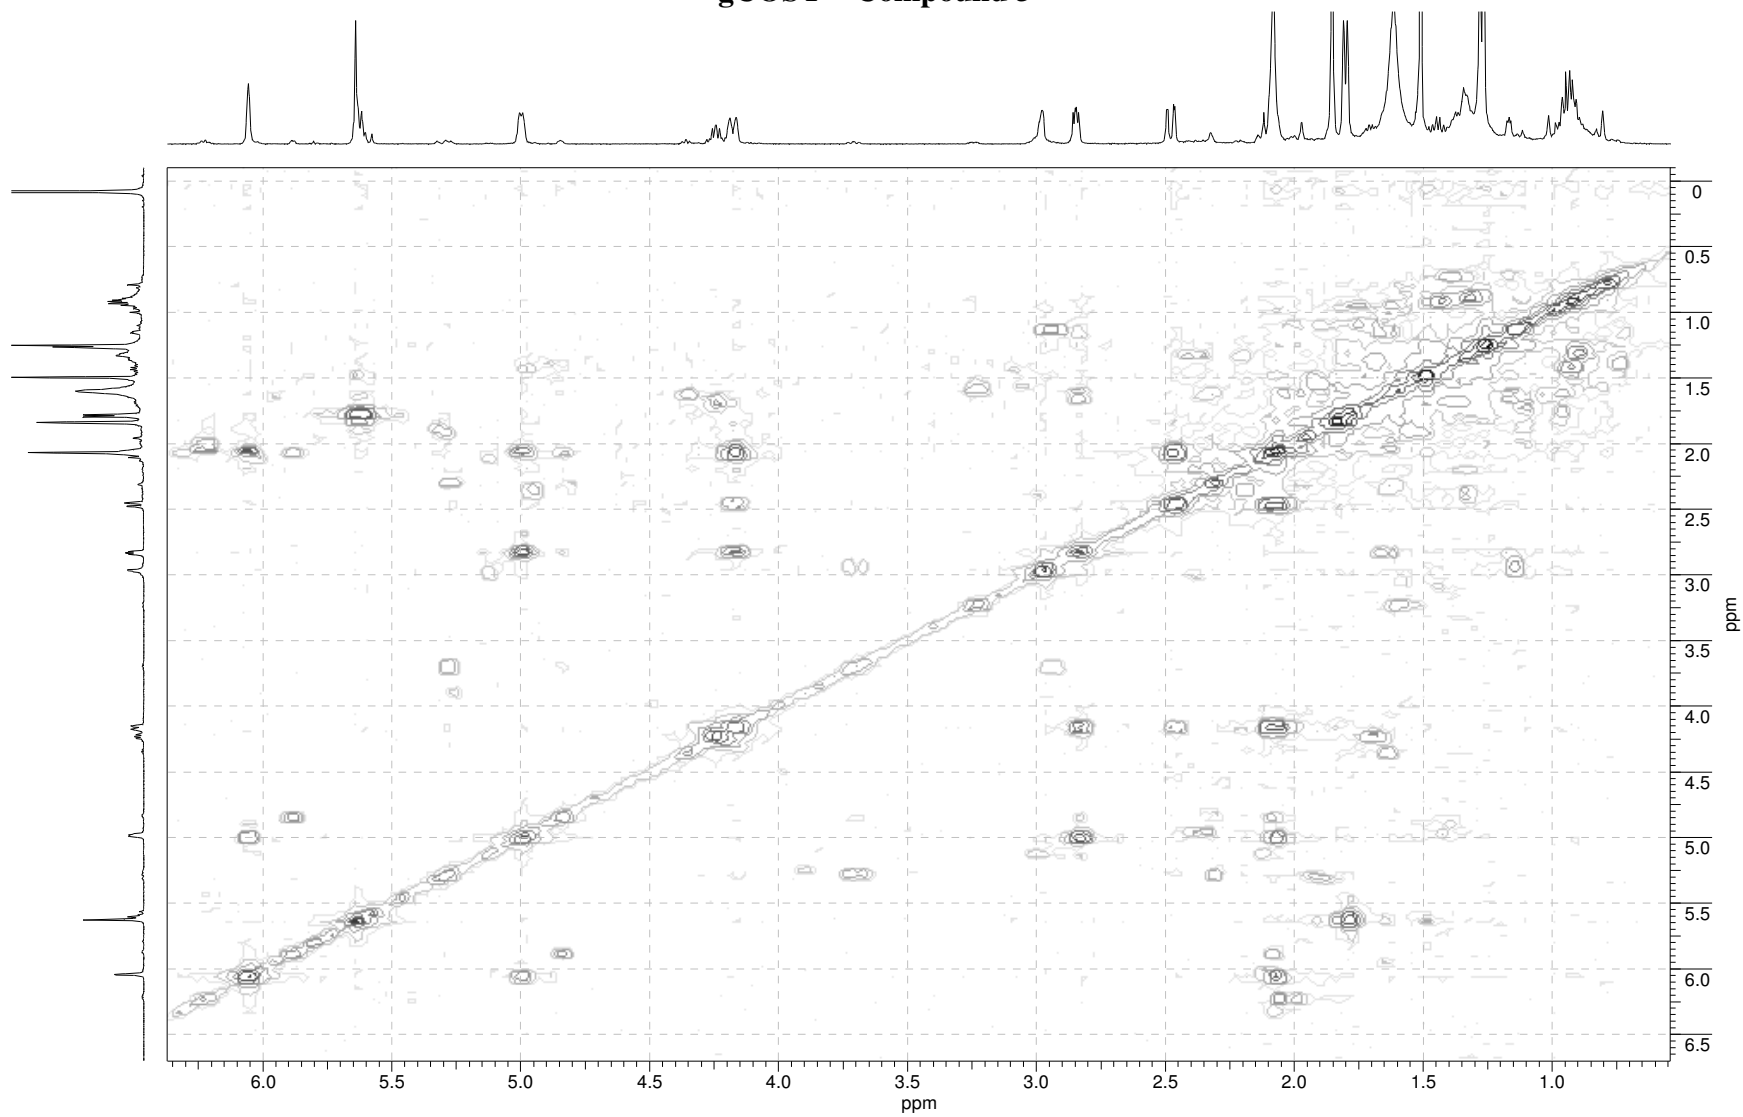

### gHMQC - Compound 3

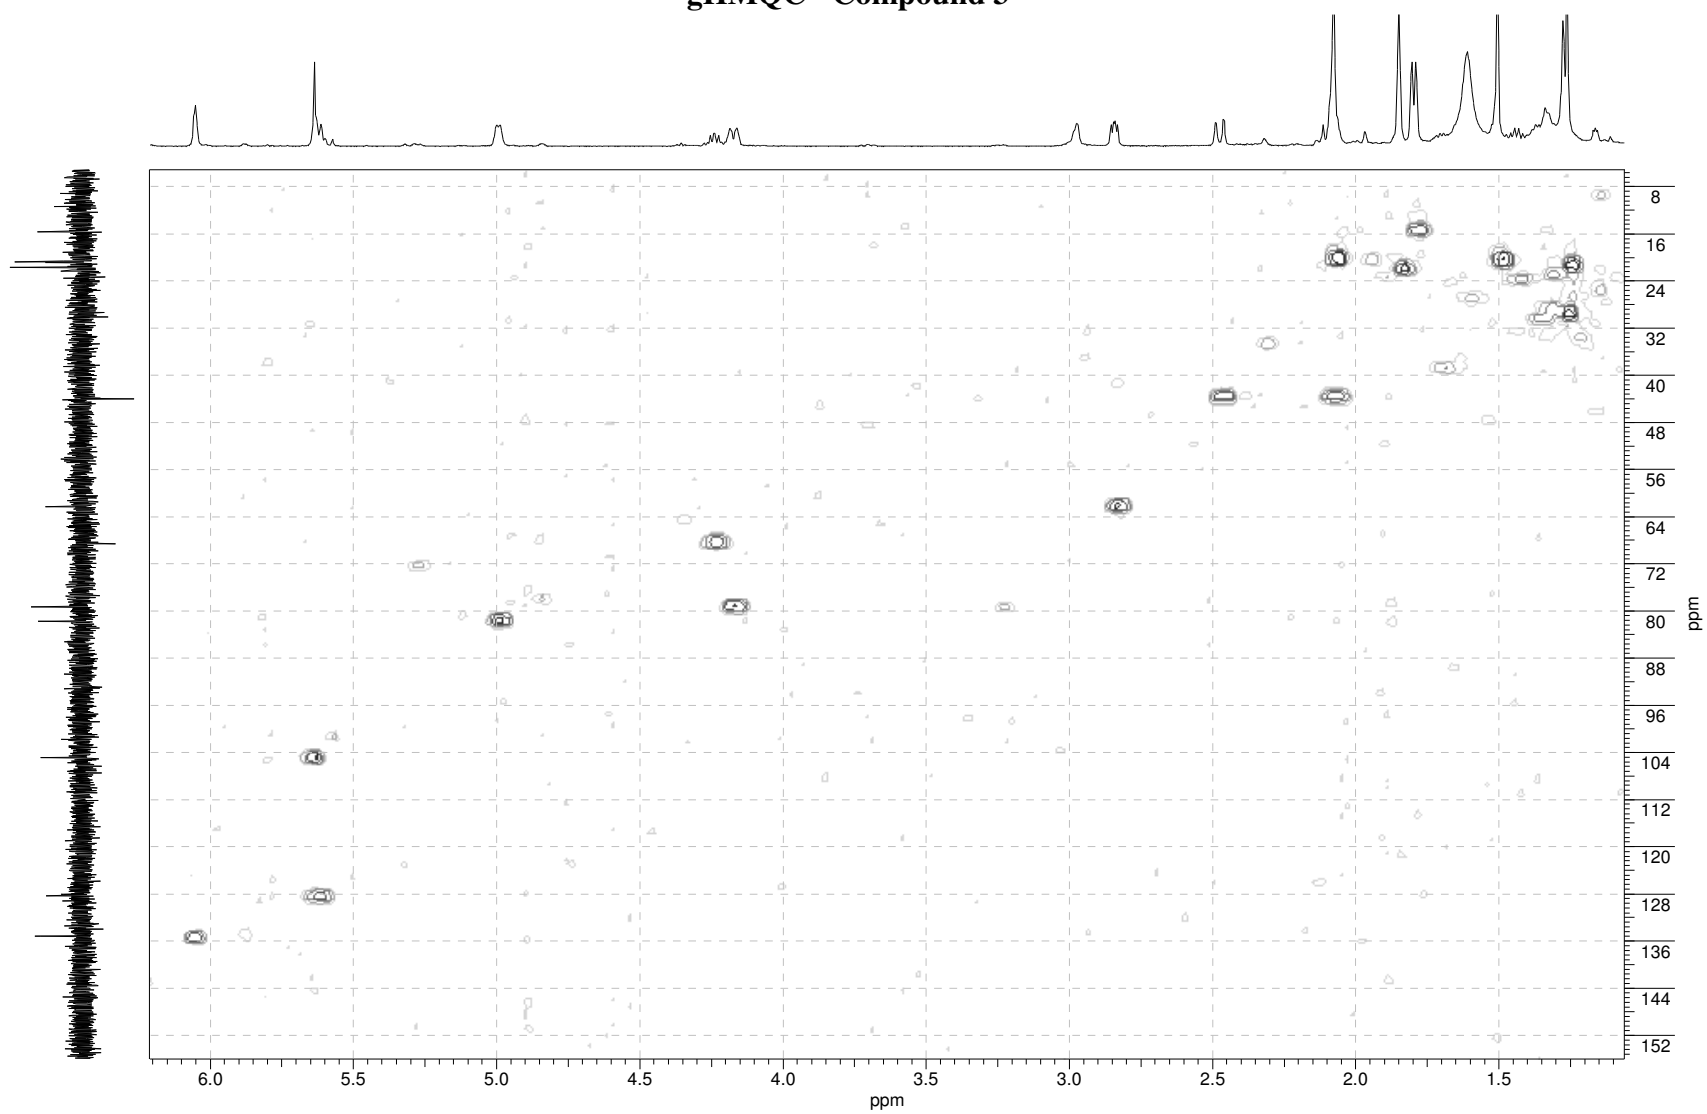



### gHMBC - Compound 3

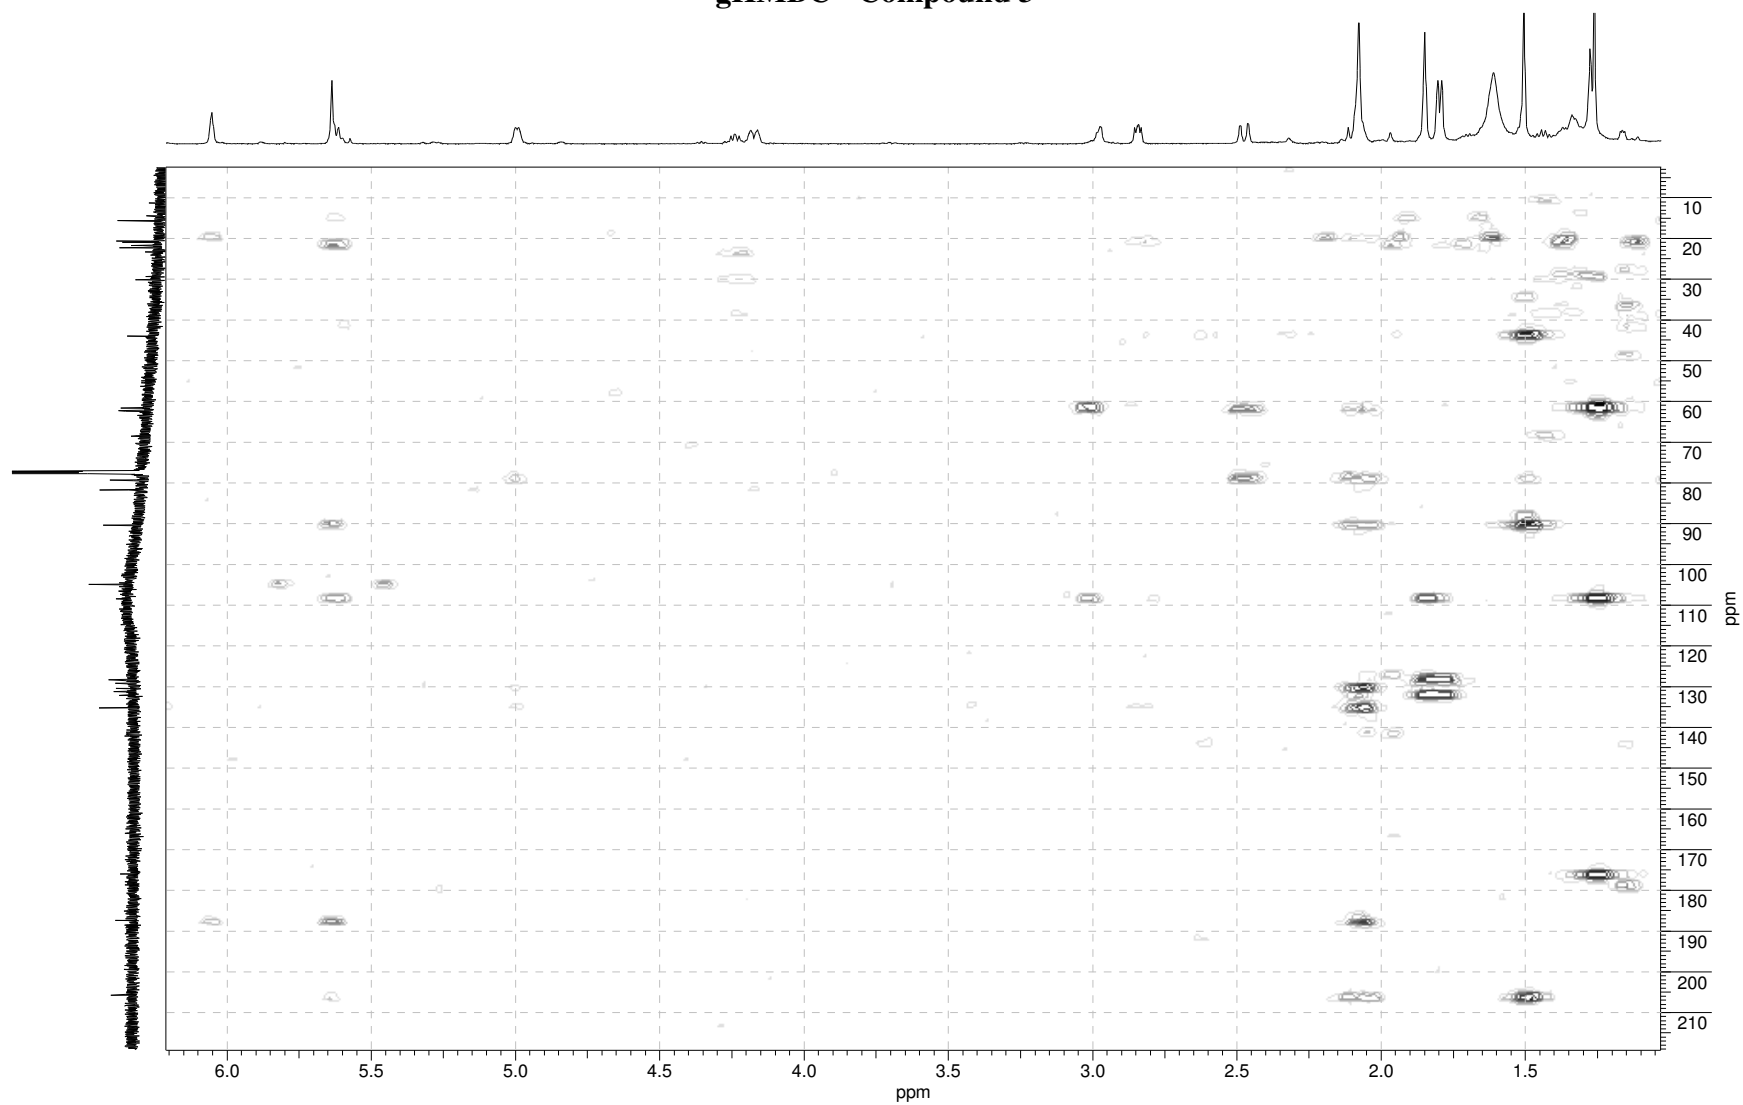

|                               |         |                               |                      |                              |              |
|-------------------------------|---------|-------------------------------|----------------------|------------------------------|--------------|
| <b>Acquisition Time (sec)</b> | 3.8535  | <b>Comment</b>                | Imported from UXMNR. |                              |              |
| <b>Frequency (MHz)</b>        | 500.13  |                               |                      |                              |              |
| <b>Nucleus</b>                | 1H      | <b>Number of Transients</b>   | 16                   | <b>Original Points Count</b> | 32768        |
| <b>Points Count</b>           | 32768   | <b>Pulse Sequence</b>         | zg30                 | <b>Solvent</b>               | CHLOROFORM-D |
| <b>Sweep Width (Hz)</b>       | 8503.40 | <b>Temperature (degree C)</b> | 27.000               |                              |              |

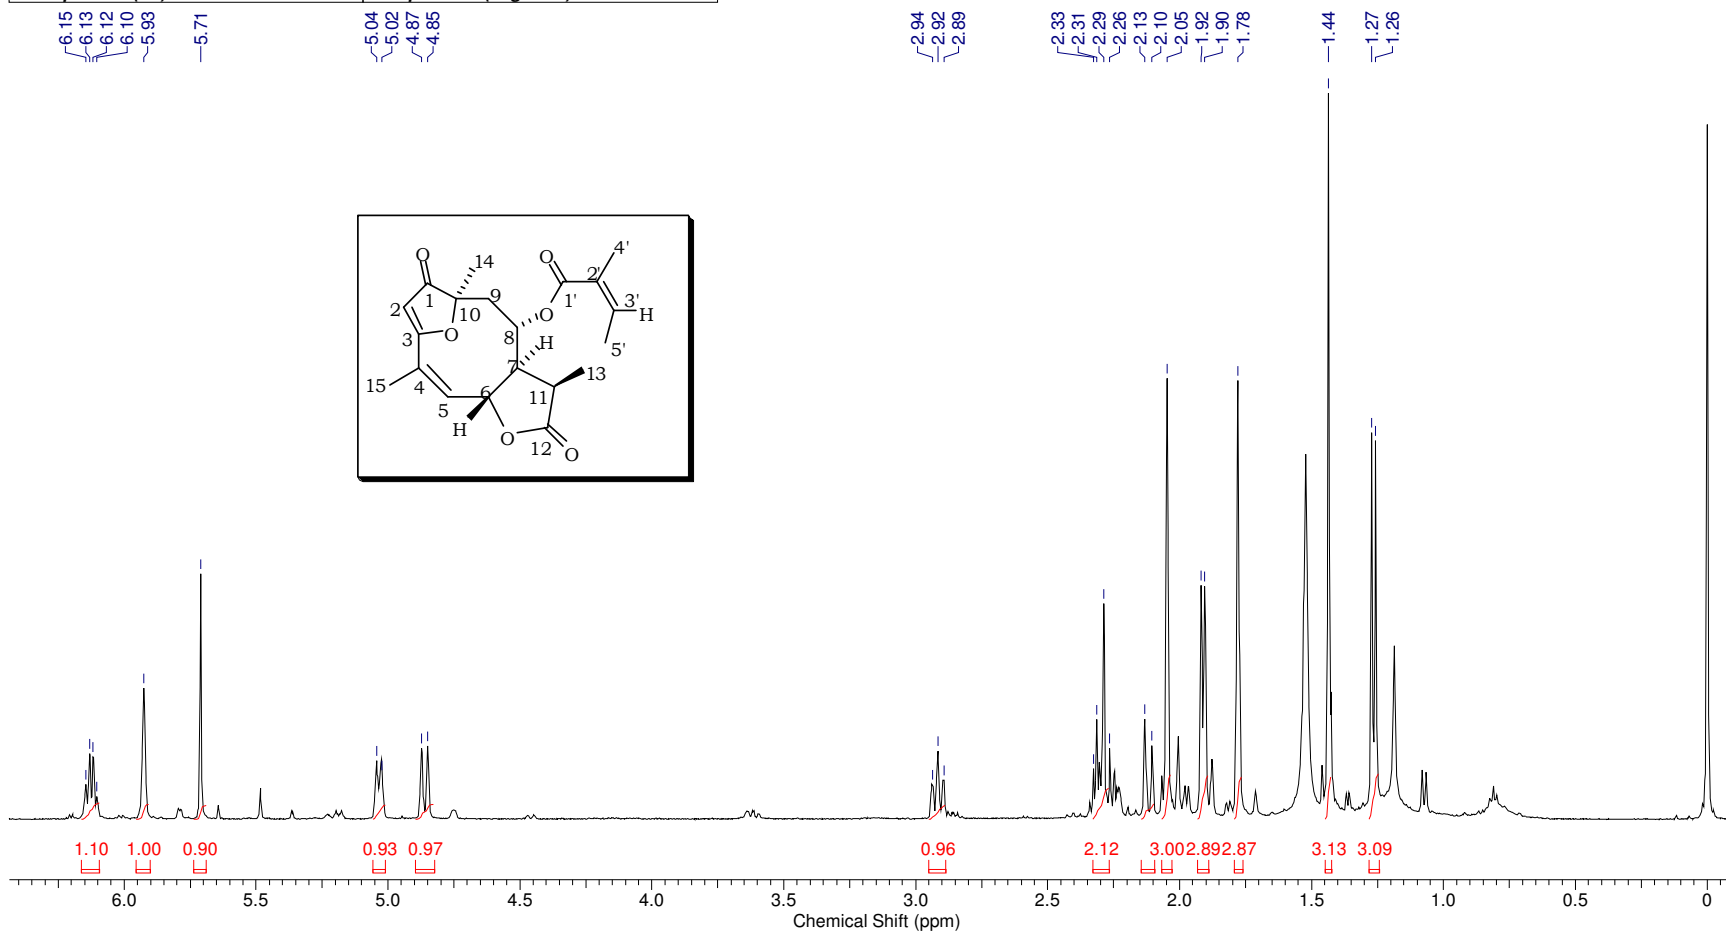

$^1\text{H}$  NMR (500 MHz) in  $\text{CDCl}_3$  of compound **10**.

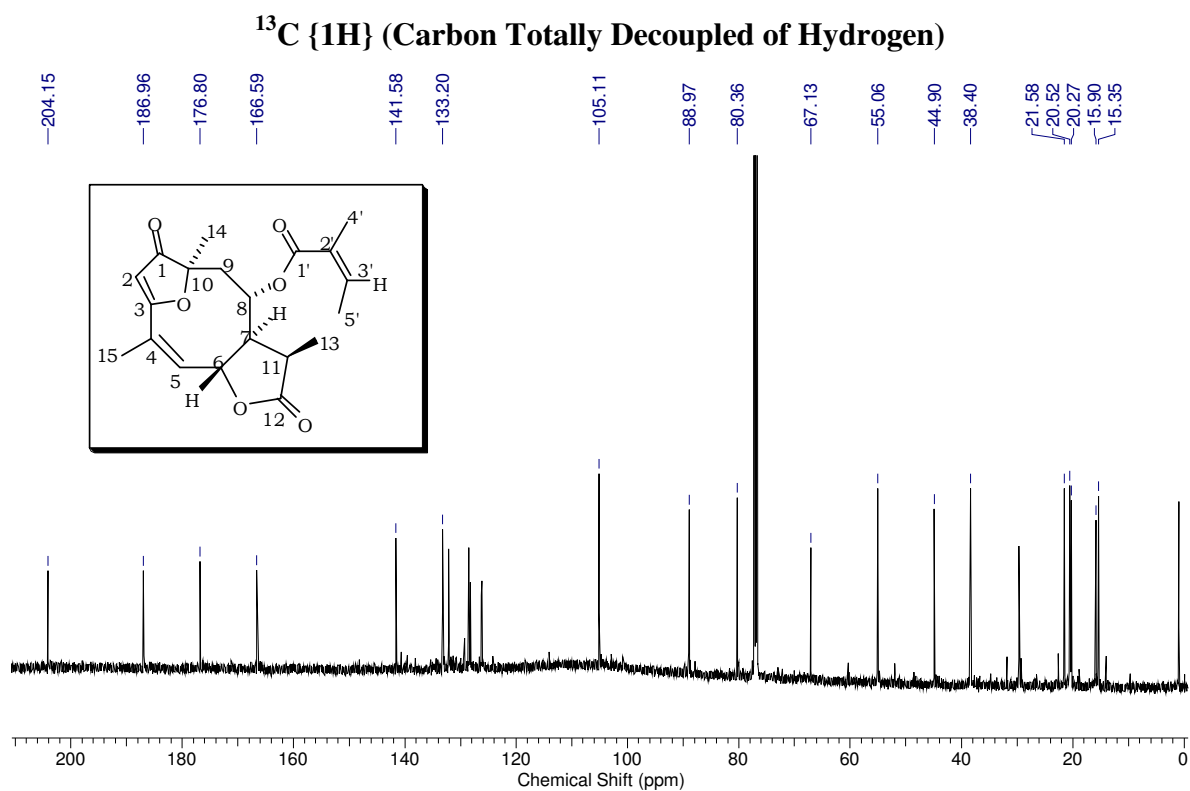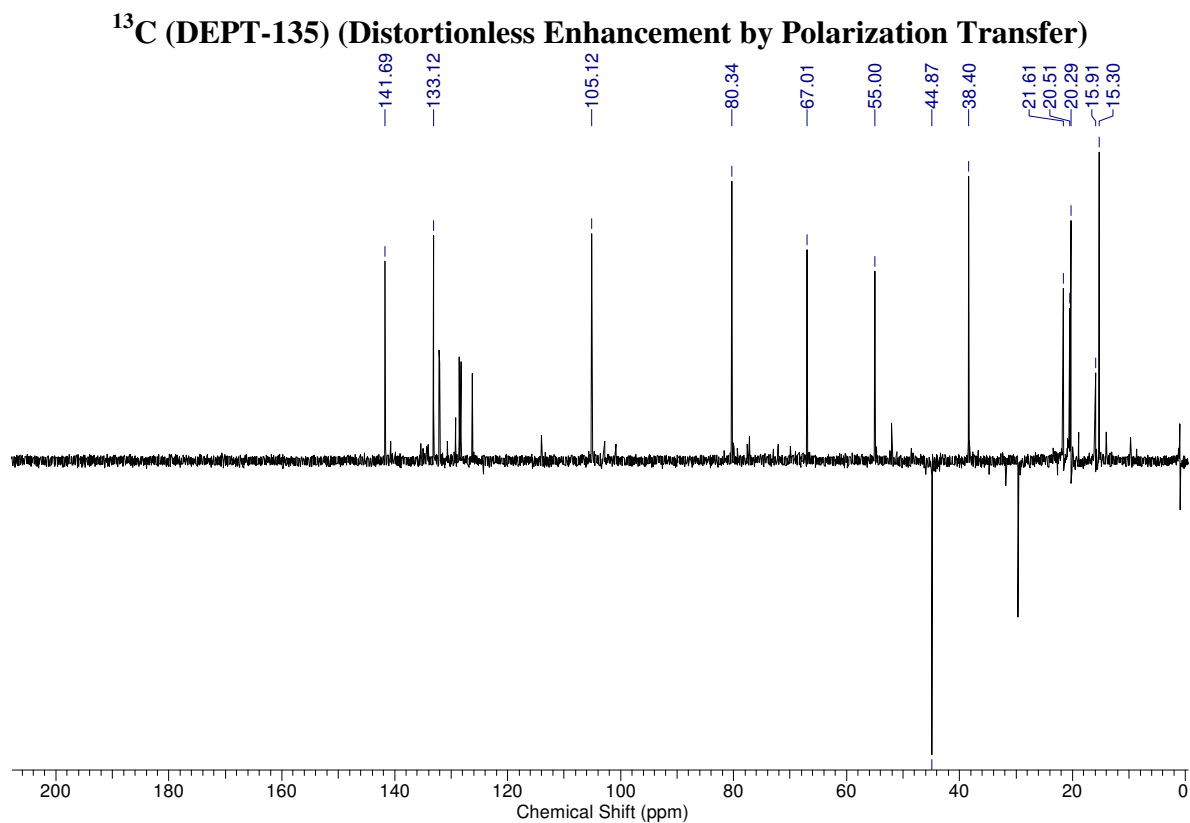

$^{13}\text{C}$  NMR (125 MHz) in  $\text{CDCl}_3$  of compound **10**.

### gCOSY – Compound 10

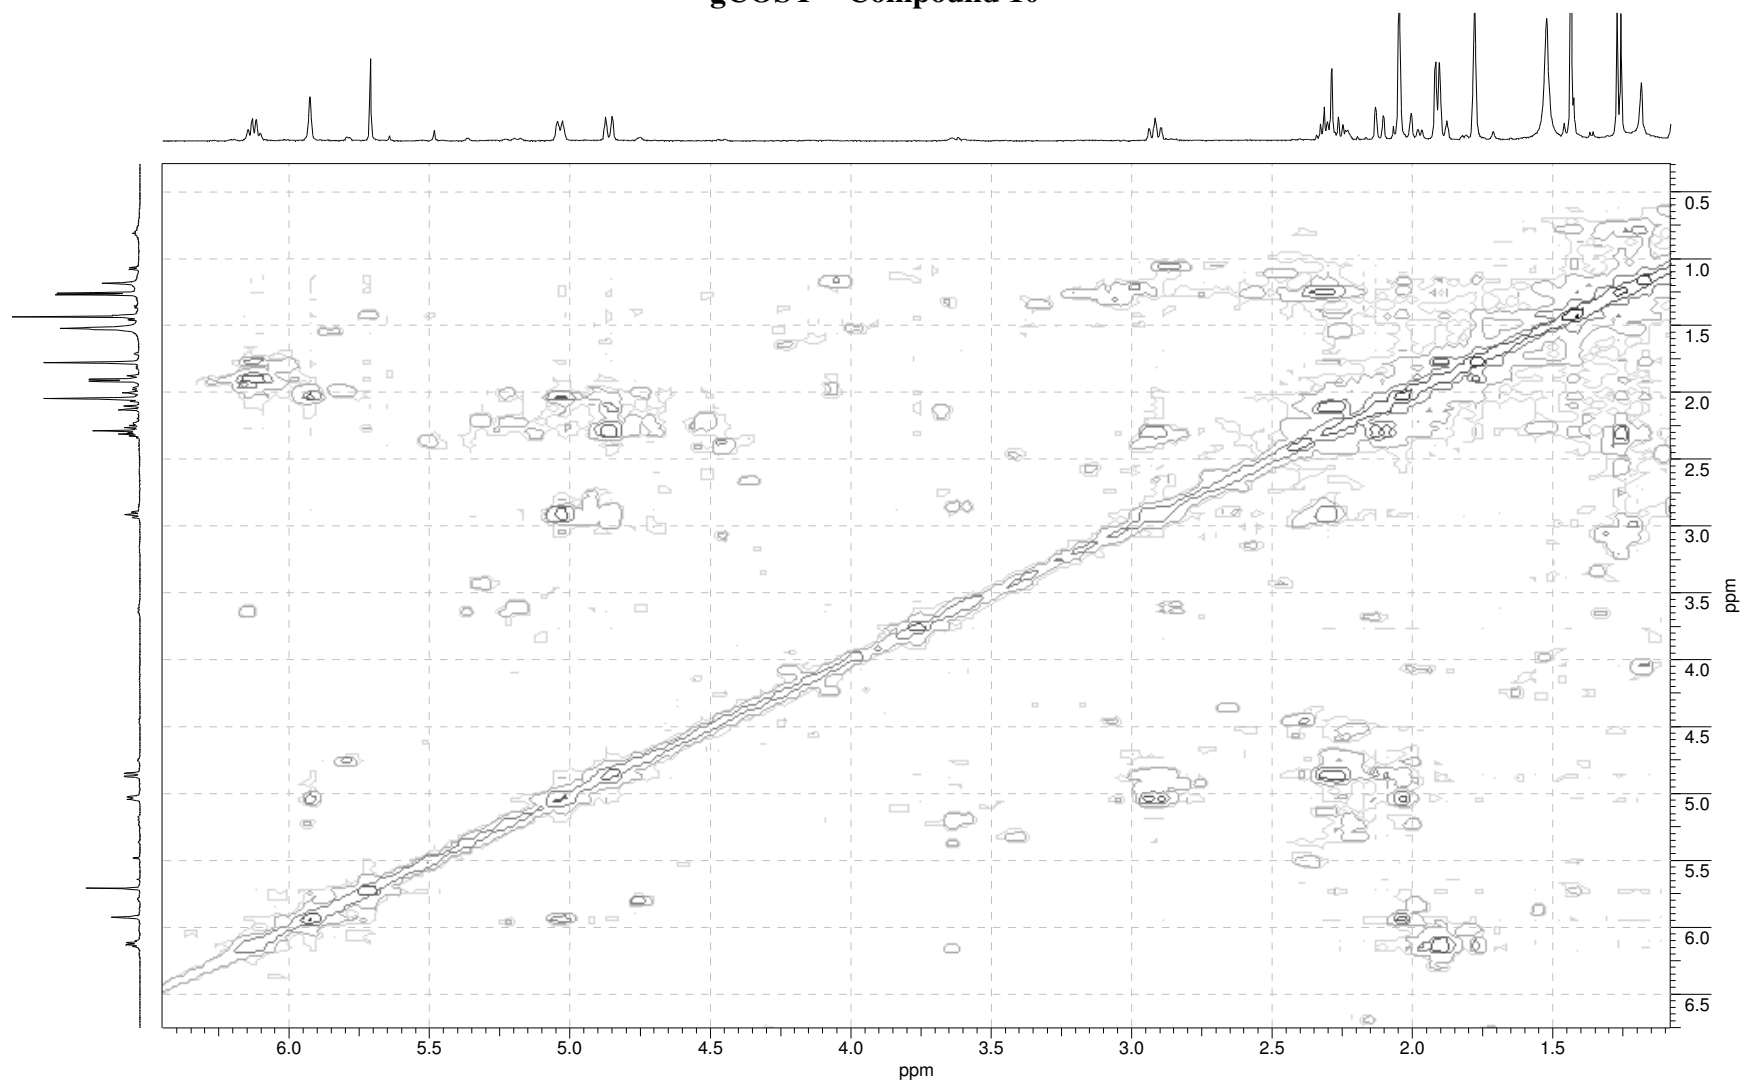

### gHMQC – Compound 10

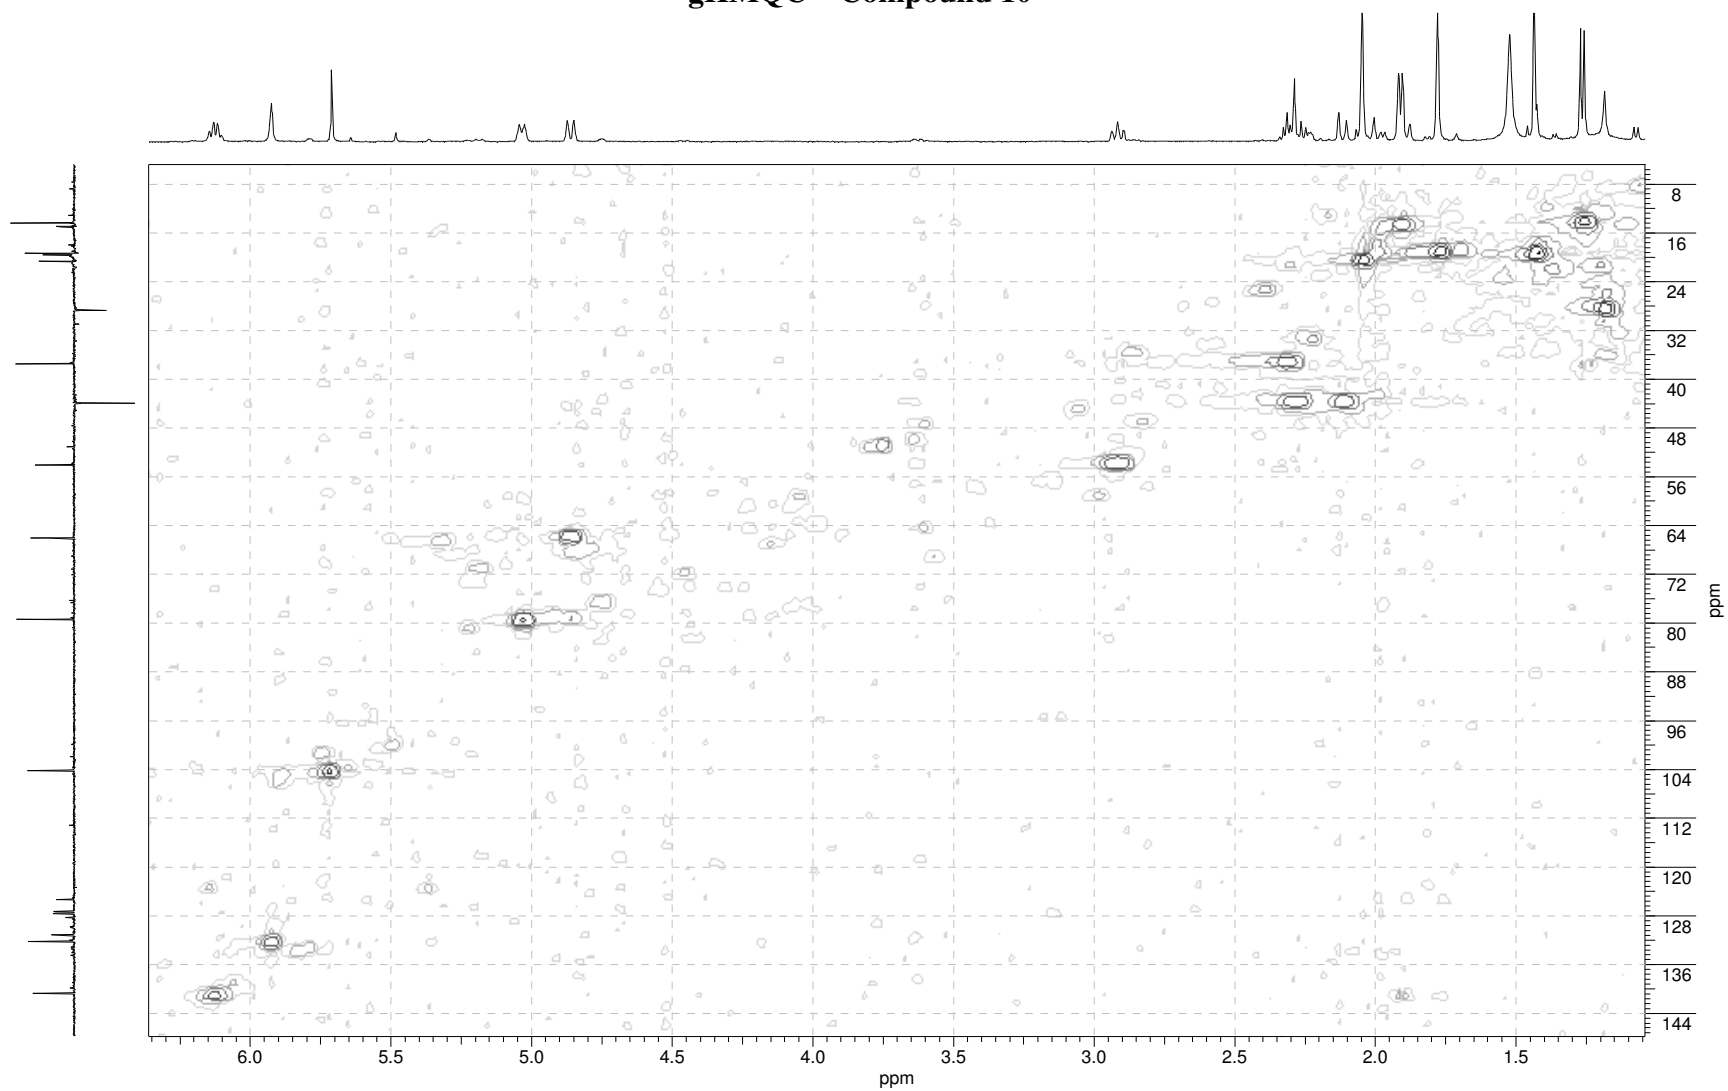

### gHMBC – Compound 10

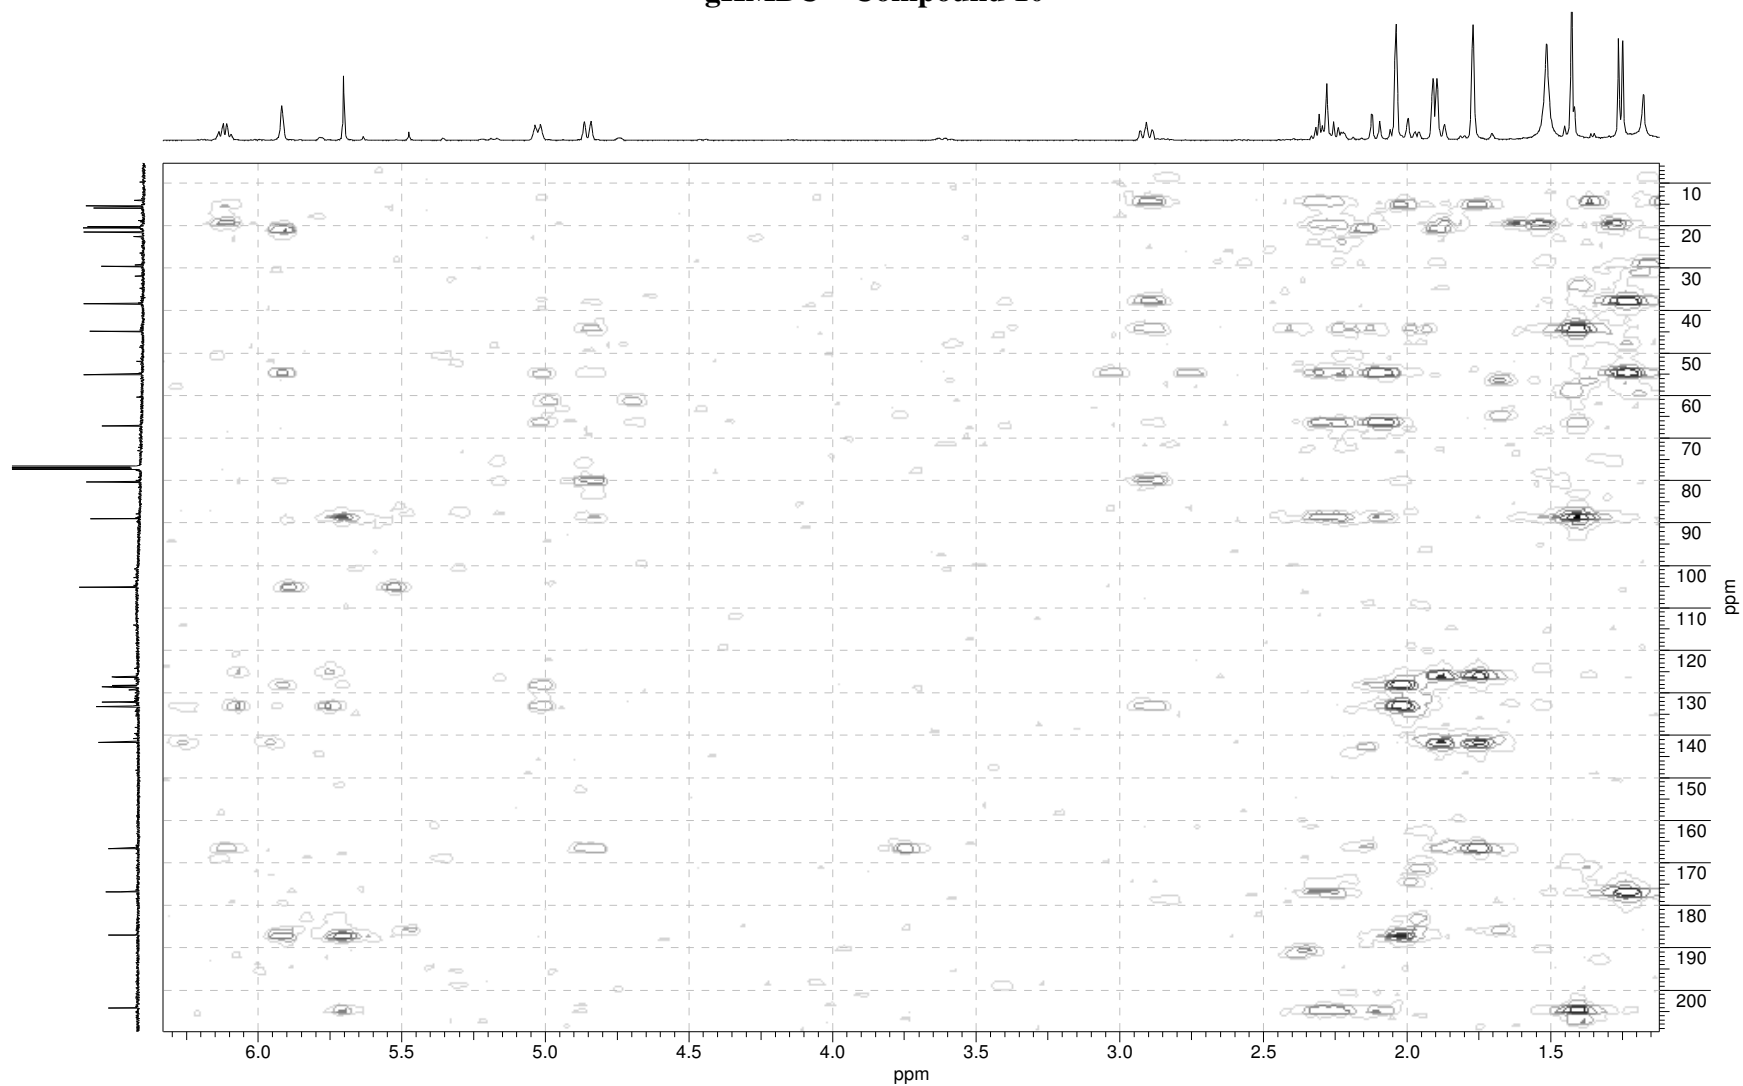

|                               |              |                         |                      |                                |
|-------------------------------|--------------|-------------------------|----------------------|--------------------------------|
| <b>Acquisition Time (sec)</b> | 4.1288       | <b>Comment</b>          | Imported from UXNMR. |                                |
| <b>Frequency (MHz)</b>        | 500.13       | <b>Nucleus</b>          | 1H                   | <b>Number of Transients</b> 32 |
| <b>Original Points Count</b>  | 32768        | <b>Points Count</b>     | 32768                | <b>Pulse Sequence</b> zg30     |
| <b>Solvent</b>                | CHLOROFORM-D | <b>Sweep Width (Hz)</b> | 7936.51              |                                |
| <b>Temperature (degree C)</b> | 27.000       |                         |                      |                                |

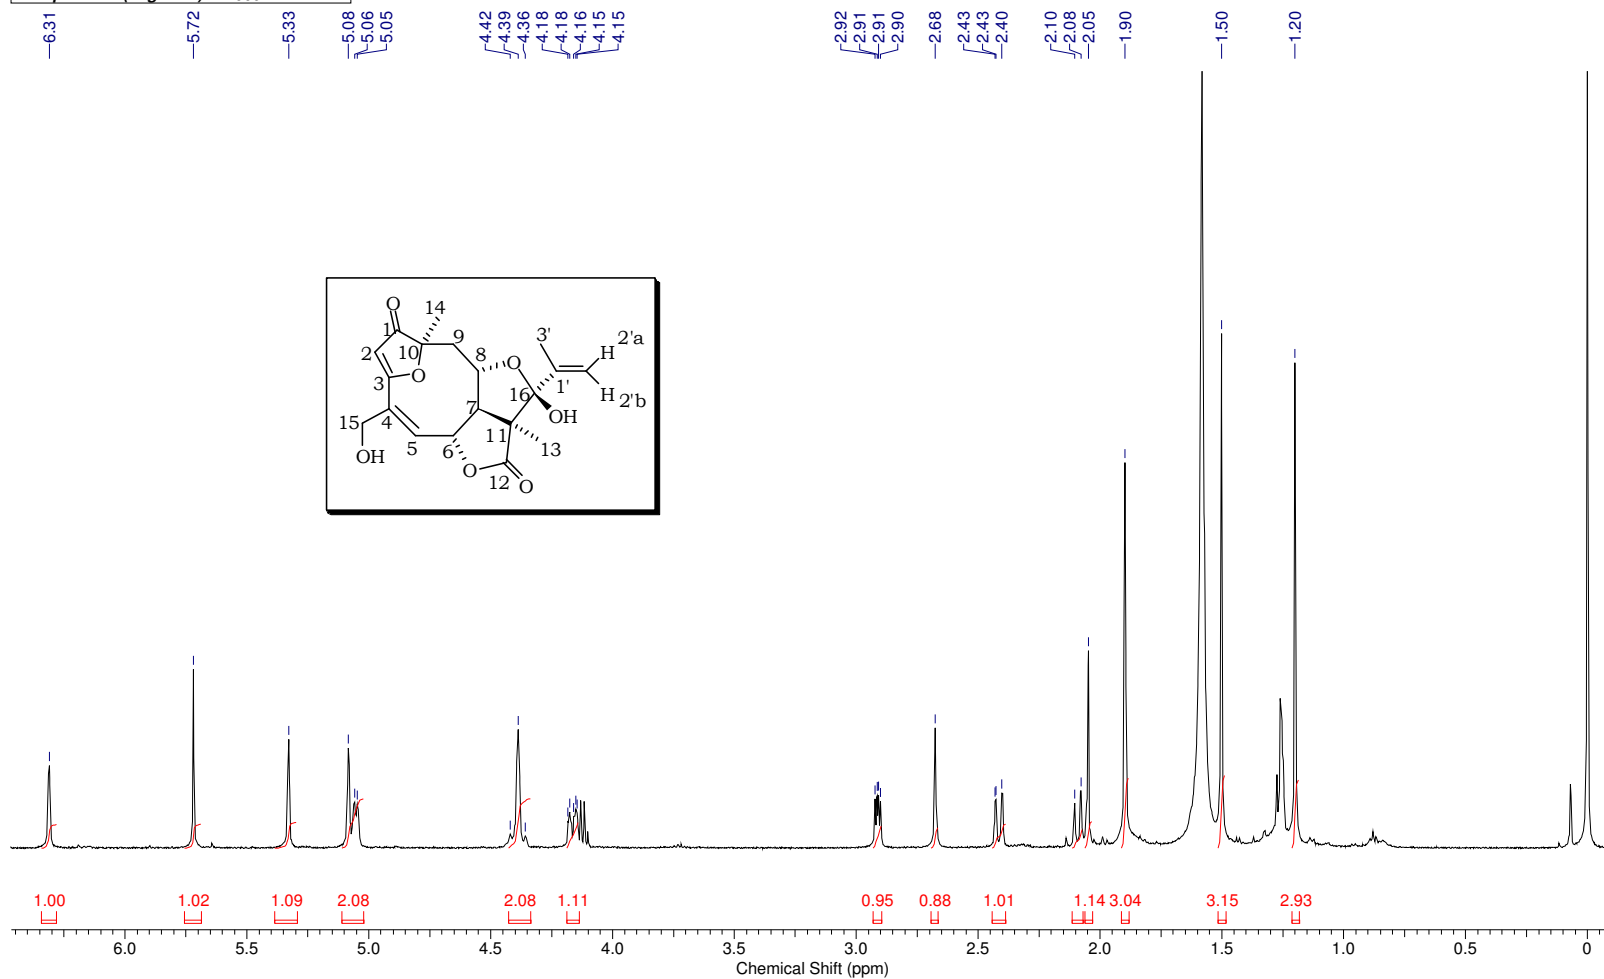

$^1\text{H}$  NMR (500 MHz) in  $\text{CDCl}_3$  of compound **2**.

### gCOSY – Compound 2

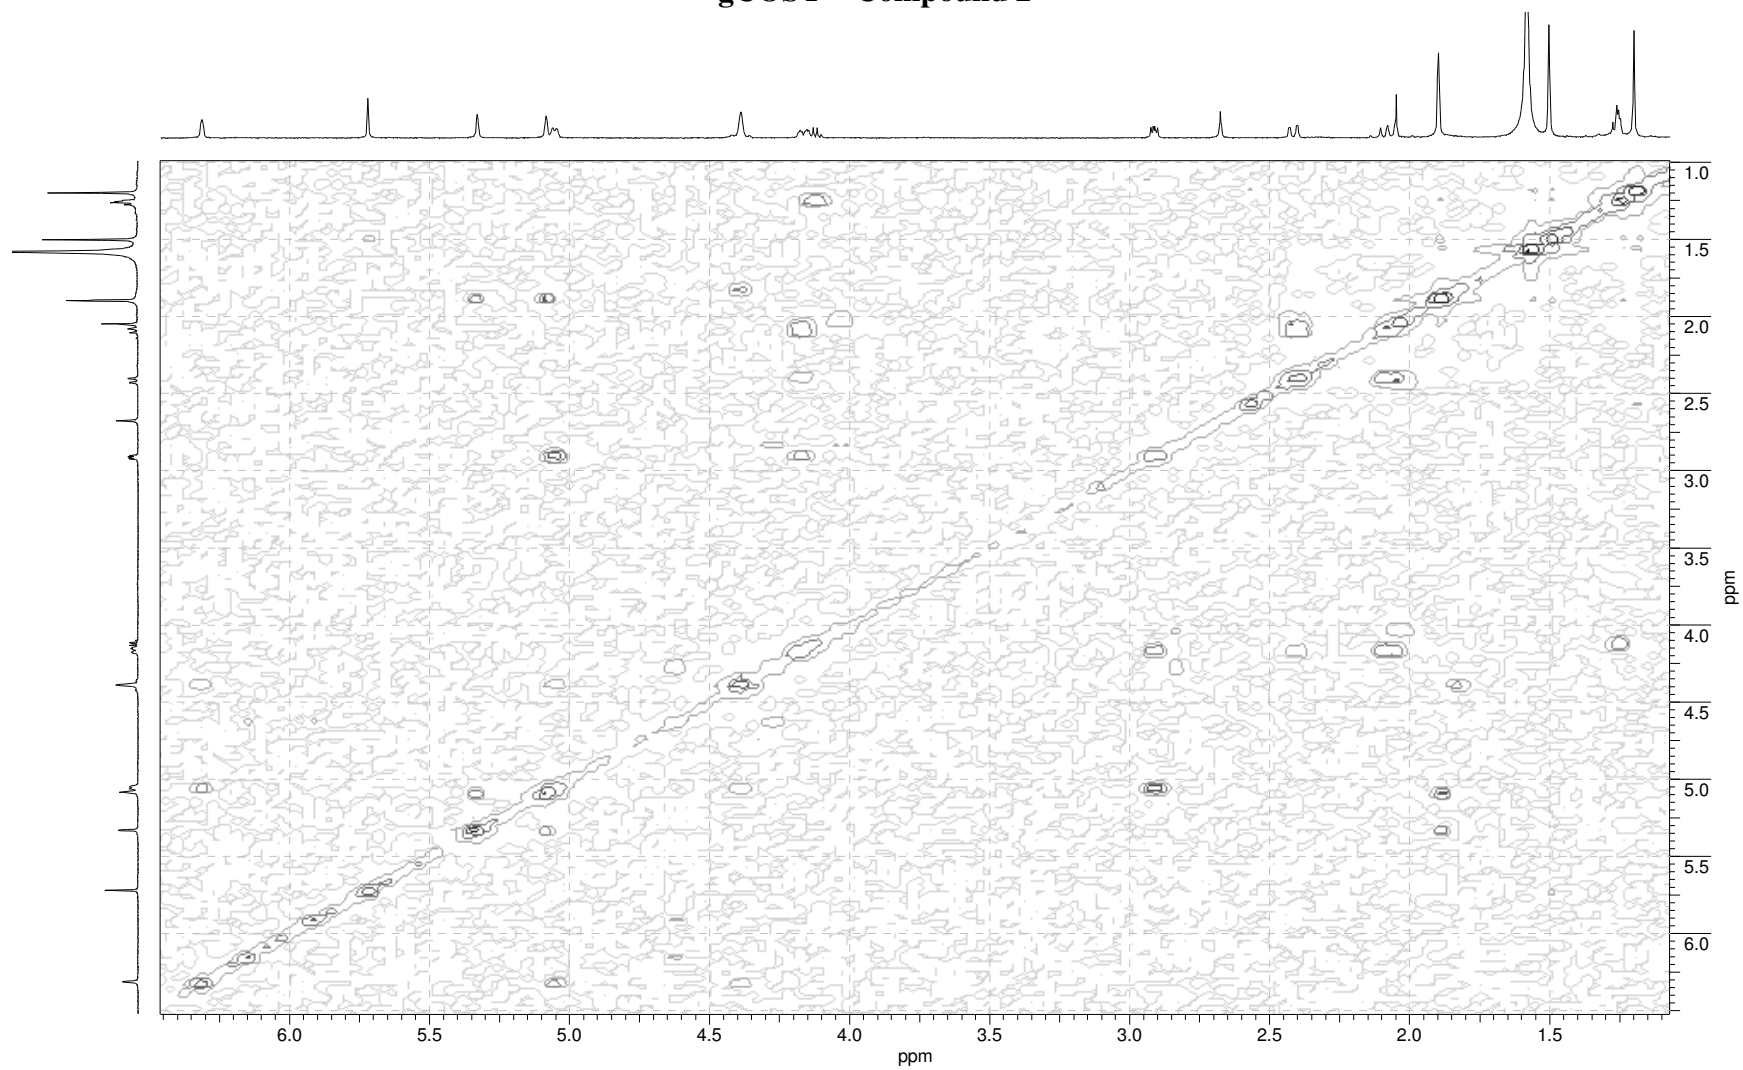



**gHMQC – Compound 2**

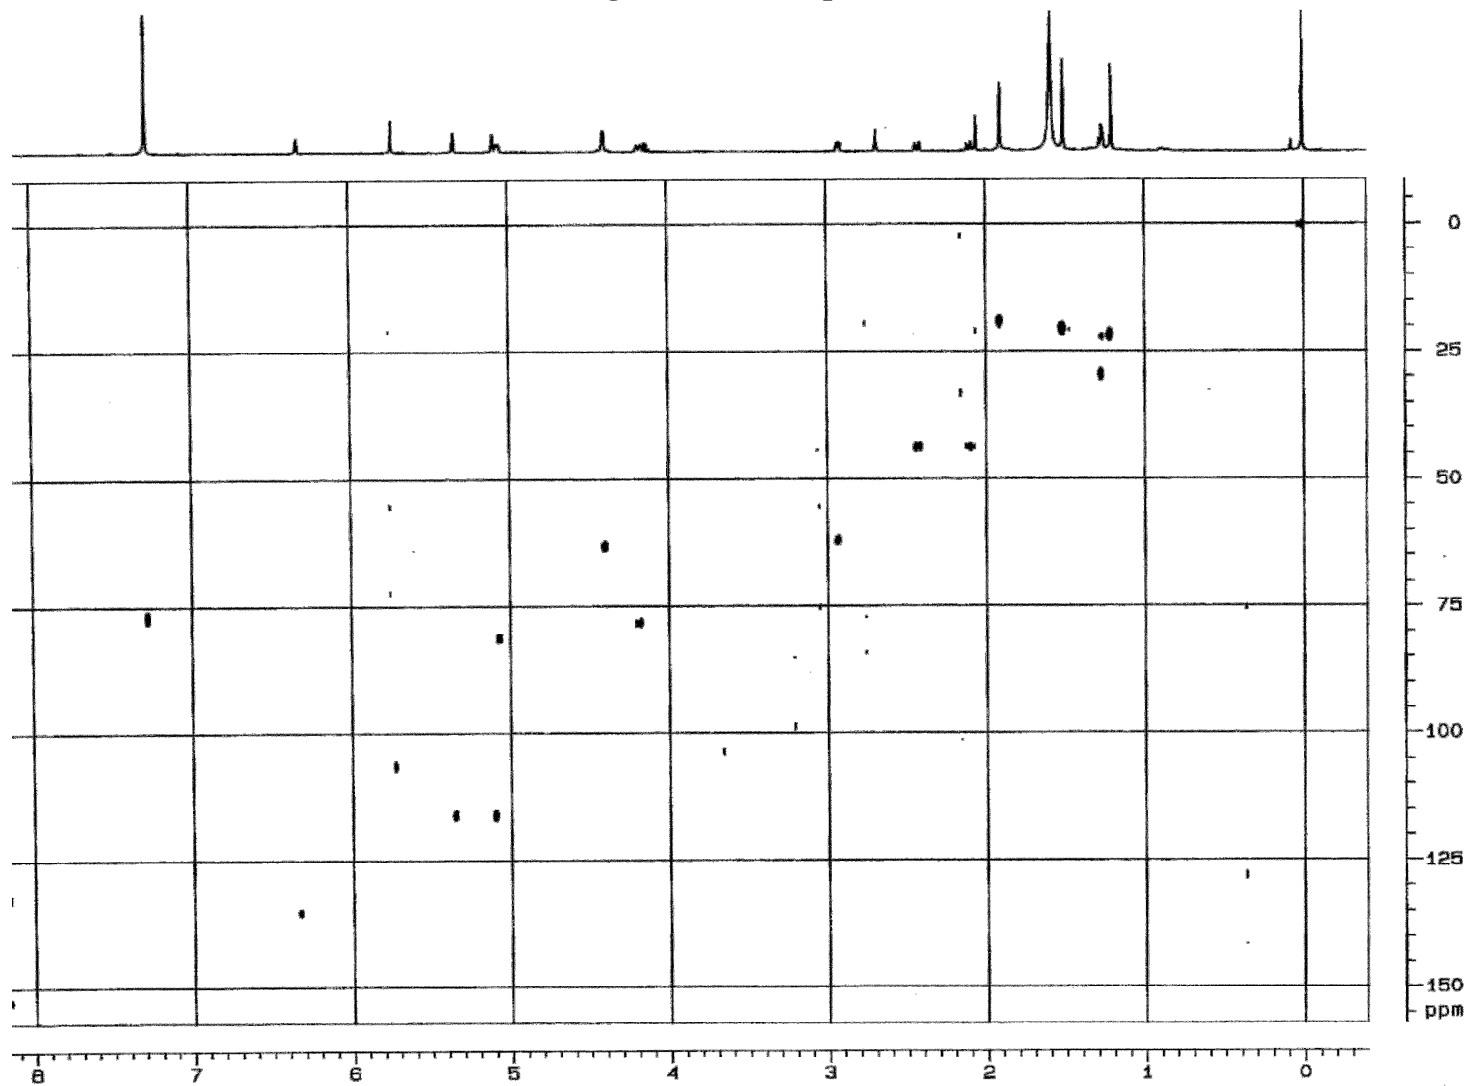

gHMBC – Compound 2

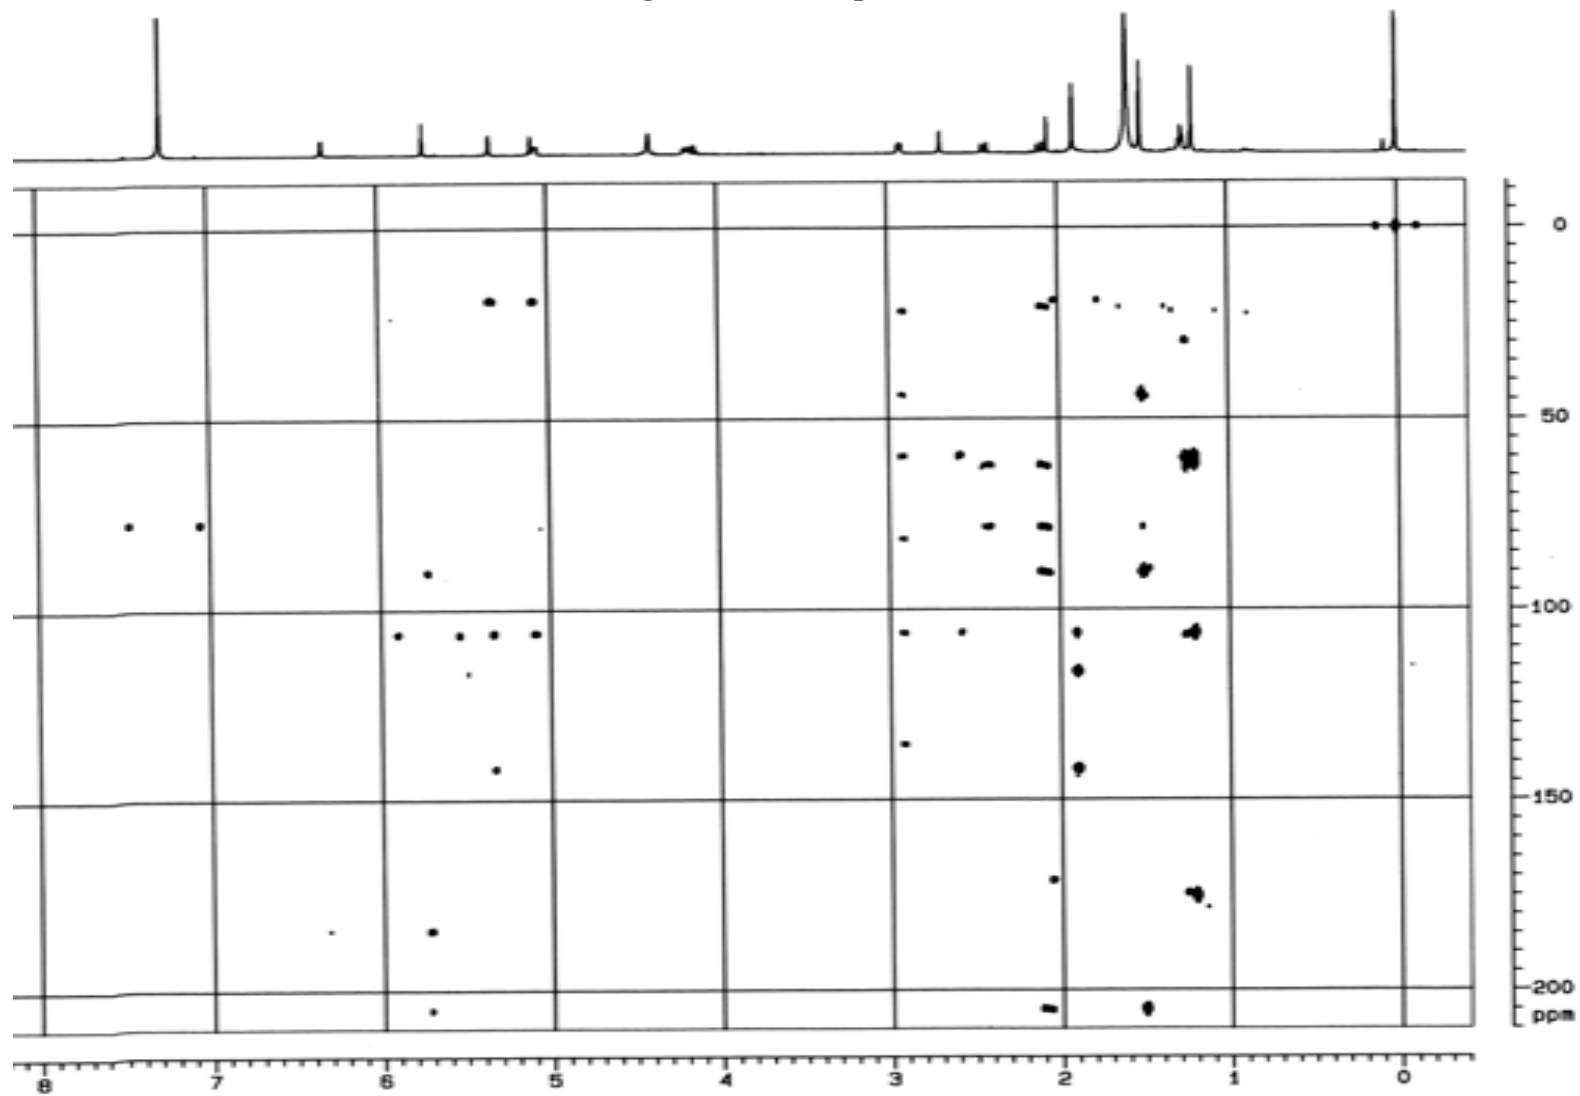

|                        |              |              |                      |                      |         |
|------------------------|--------------|--------------|----------------------|----------------------|---------|
| Acquisition Time (sec) | 3.9059       | Comment      | Imported from UXNMR. |                      |         |
| Frequency (MHz)        | 500.13       | Nucleus      | 1H                   | Number of Transients | 16      |
| Original Points Count  | 32768        | Points Count | 32768                | Pulse Sequence       | zg30    |
| Solvent                | CHLOROFORM-D |              |                      | Sweep Width (Hz)     | 8389.26 |
| Temperature (degree C) | 27.000       |              |                      |                      |         |

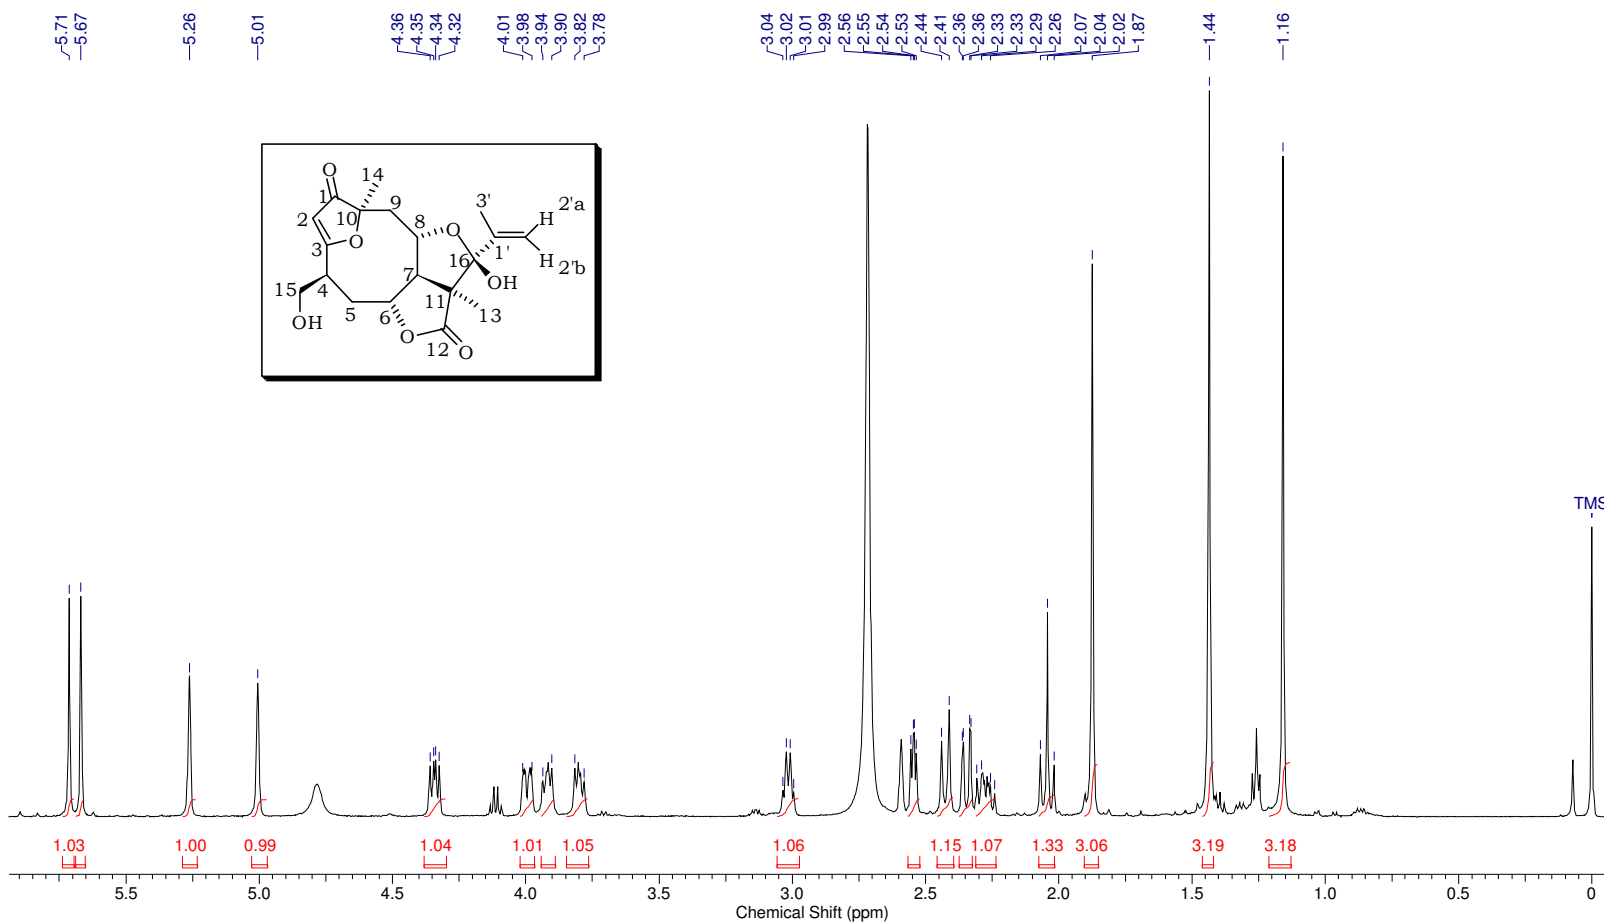

<sup>1</sup>H NMR (500 MHz) in CDCl<sub>3</sub> with 10% DMSO-d<sub>6</sub> of compound **11**.

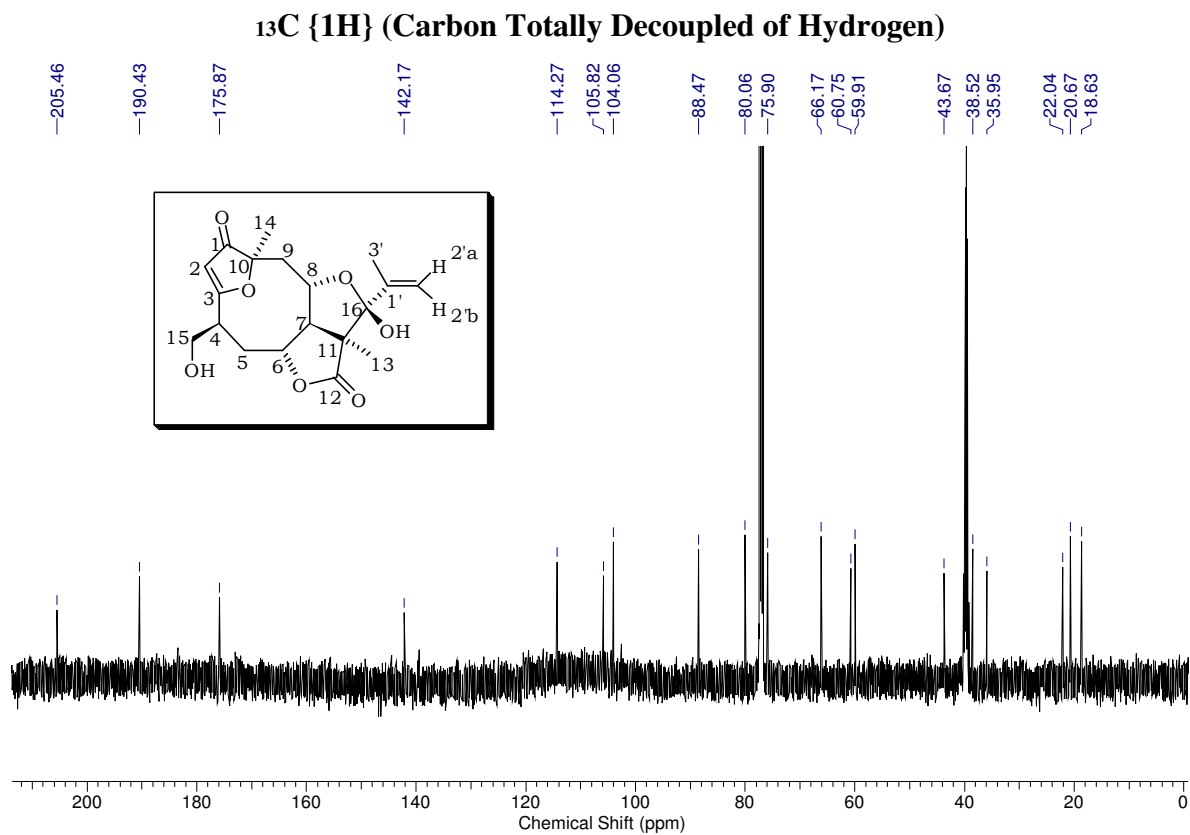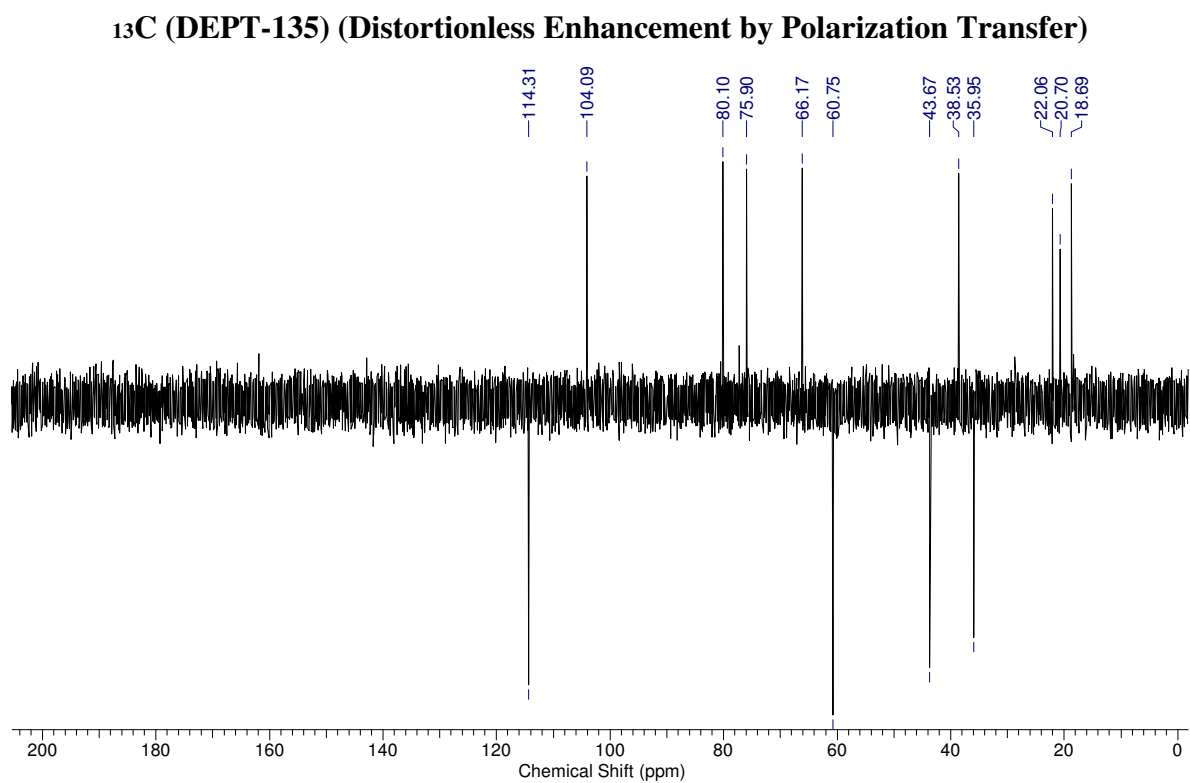

$^{13}\text{C}$  NMR (125 MHz) in  $\text{CDCl}_3$  with 10%  $\text{DMSO-d}_6$  of compound **11**.

### gCOSY – Compound 11

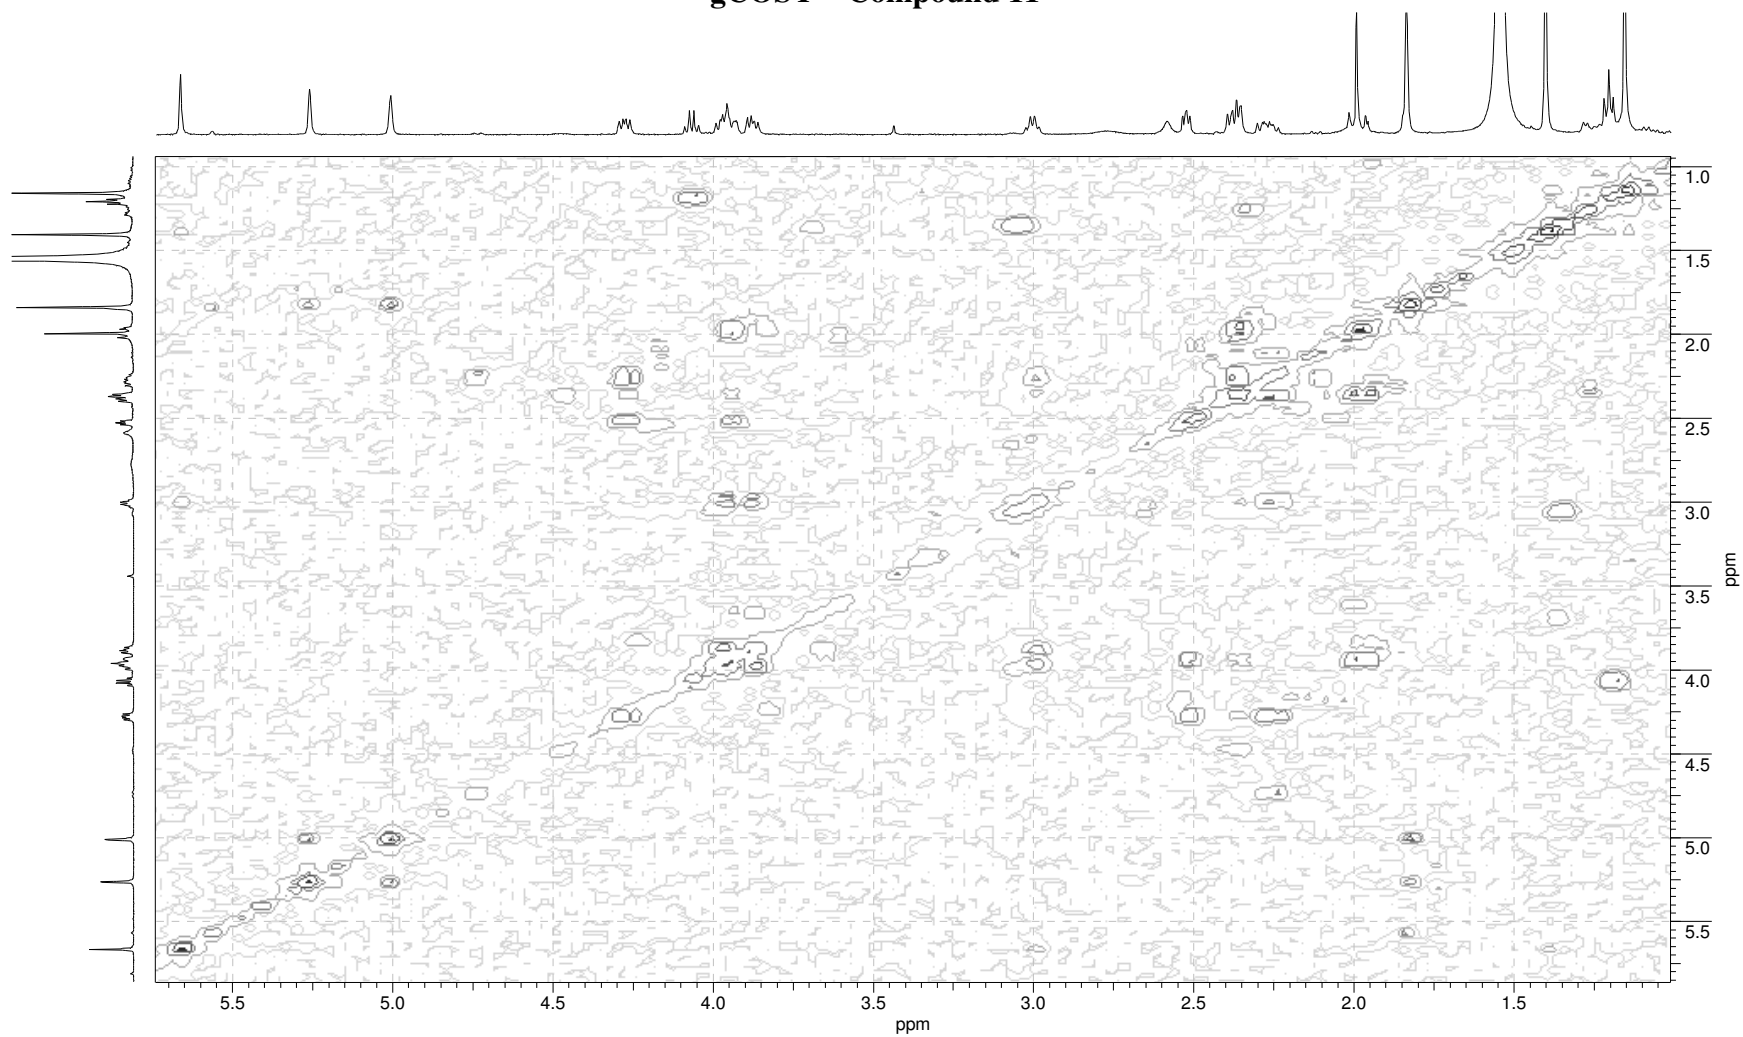

### gHMQC – Compound 11

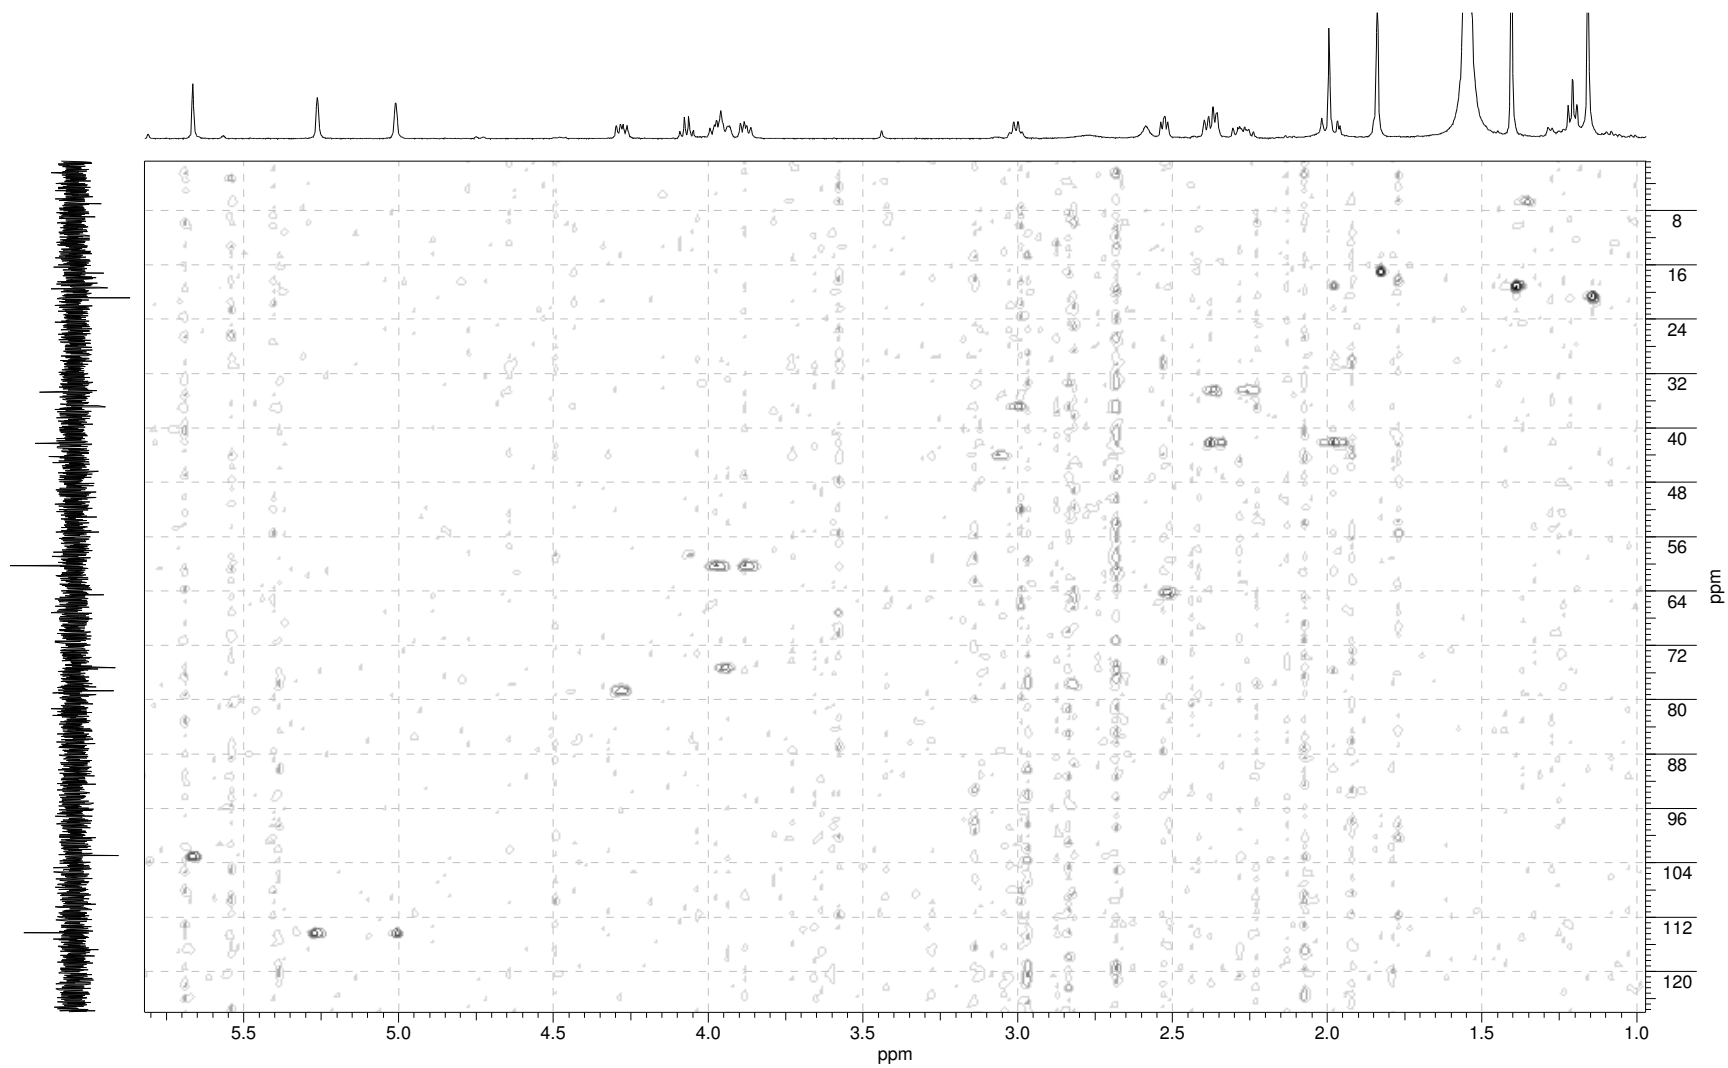

### gHMBC – Compound 11

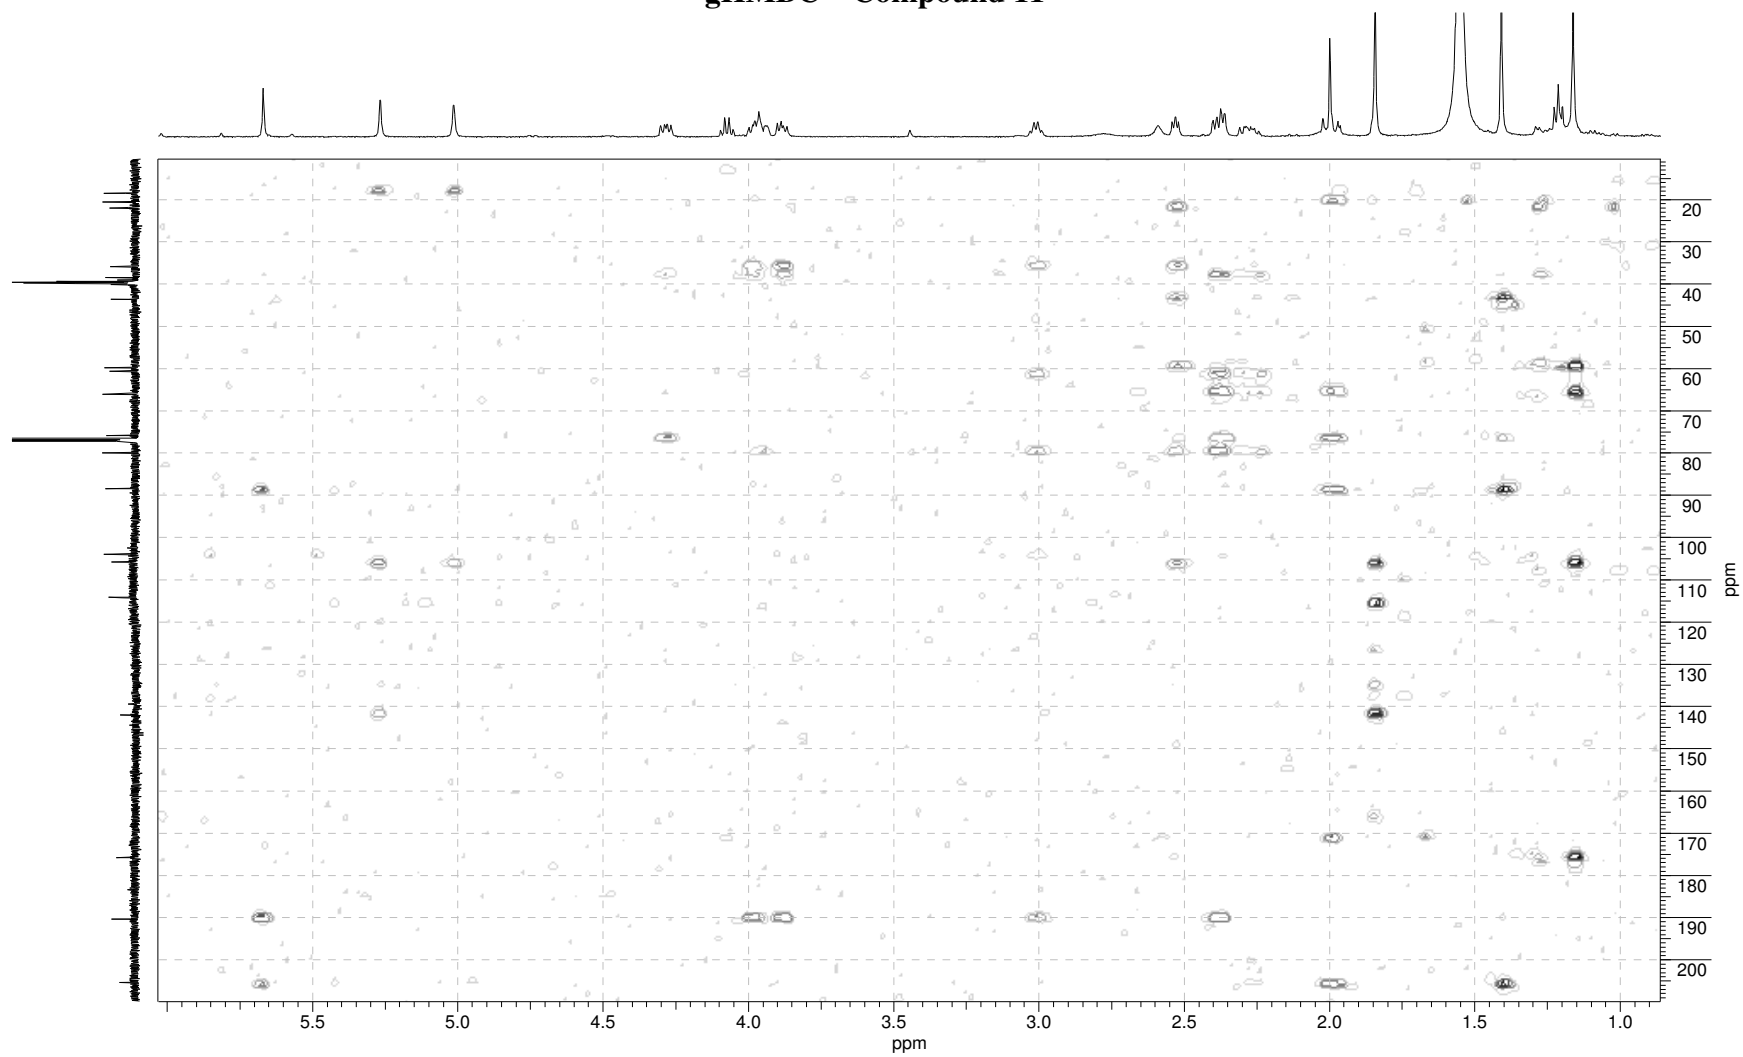

### gNOESY – Compound 11

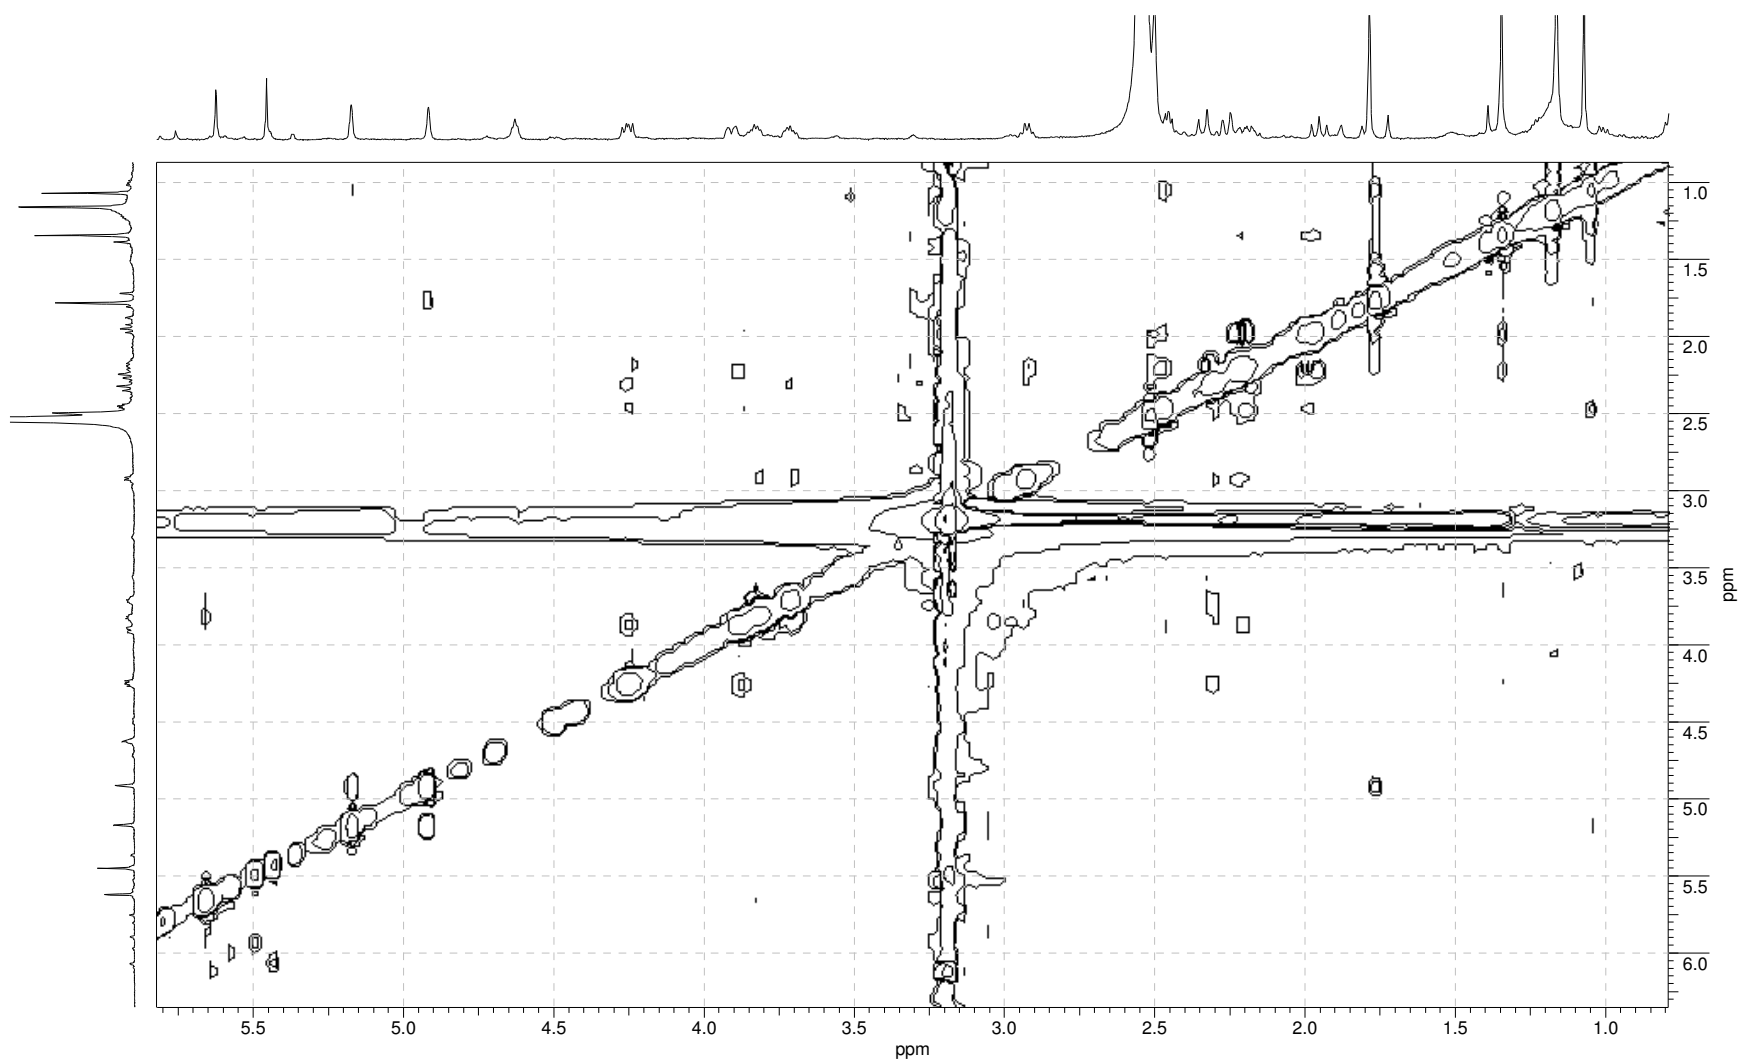



|                        |              |                  |                      |                      |      |
|------------------------|--------------|------------------|----------------------|----------------------|------|
| Acquisition Time (sec) | 4.0108       | Comment          | Imported from UXNMR. |                      |      |
| Frequency (MHz)        | 500.13       | Nucleus          | 1H                   | Number of Transients | 16   |
| Original Points Count  | 32768        | Points Count     | 32768                | Pulse Sequence       | zg30 |
| Solvent                | CHLOROFORM-D | Sweep Width (Hz) | 8169.93              |                      |      |
| Temperature (degree C) | 27.000       |                  |                      |                      |      |

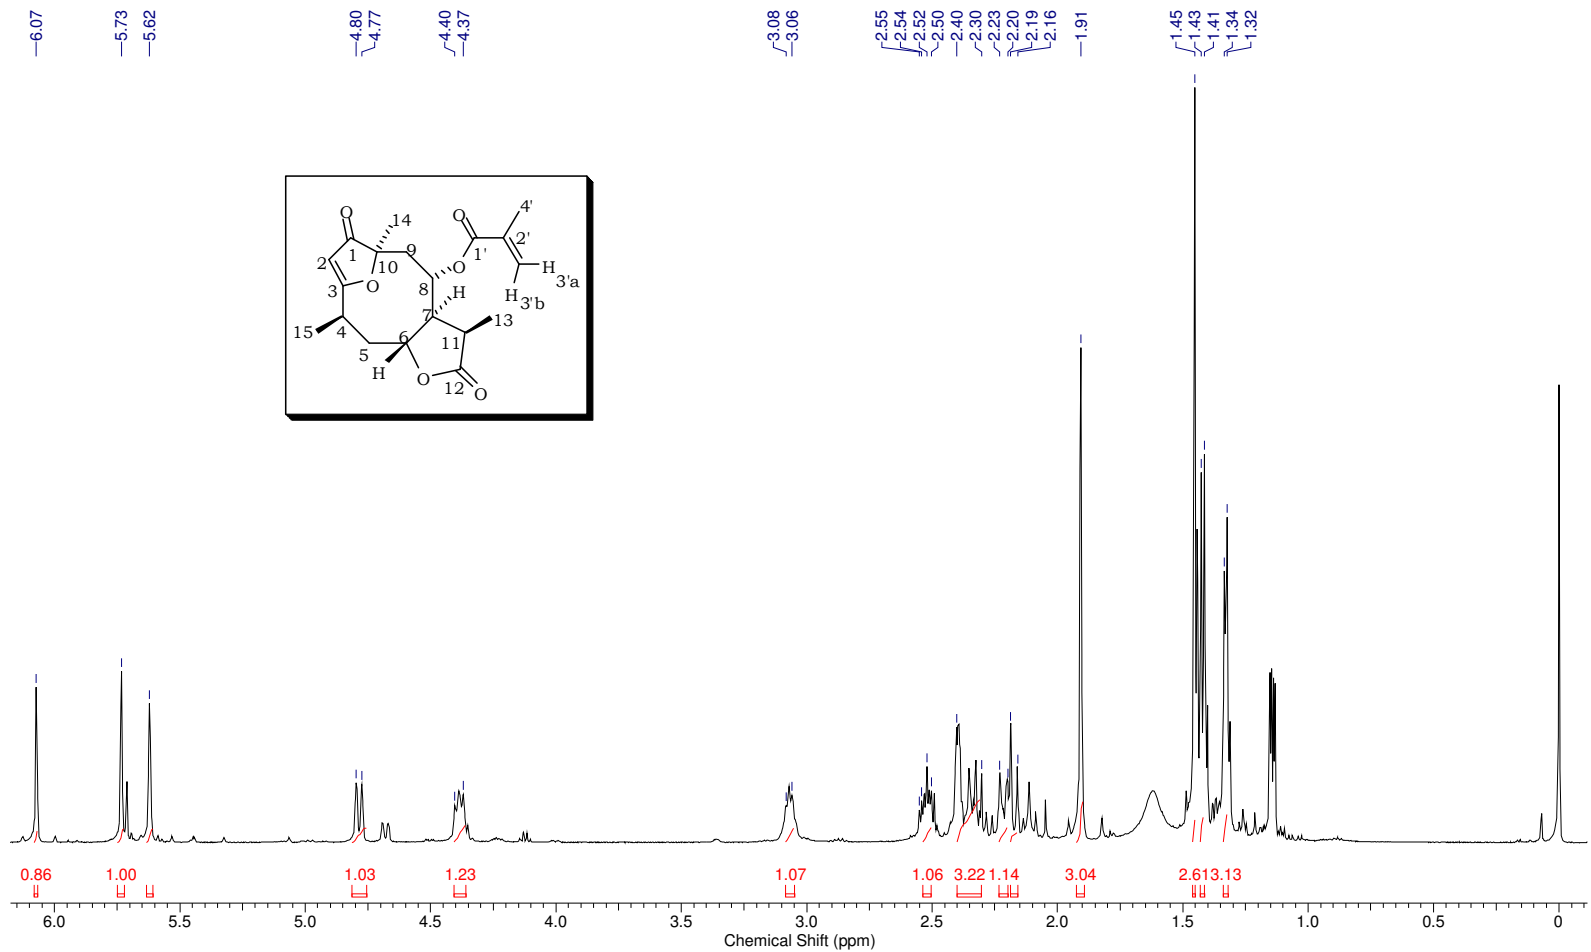

<sup>1</sup>H NMR (500 MHz) in CDCl<sub>3</sub> of compound 12.

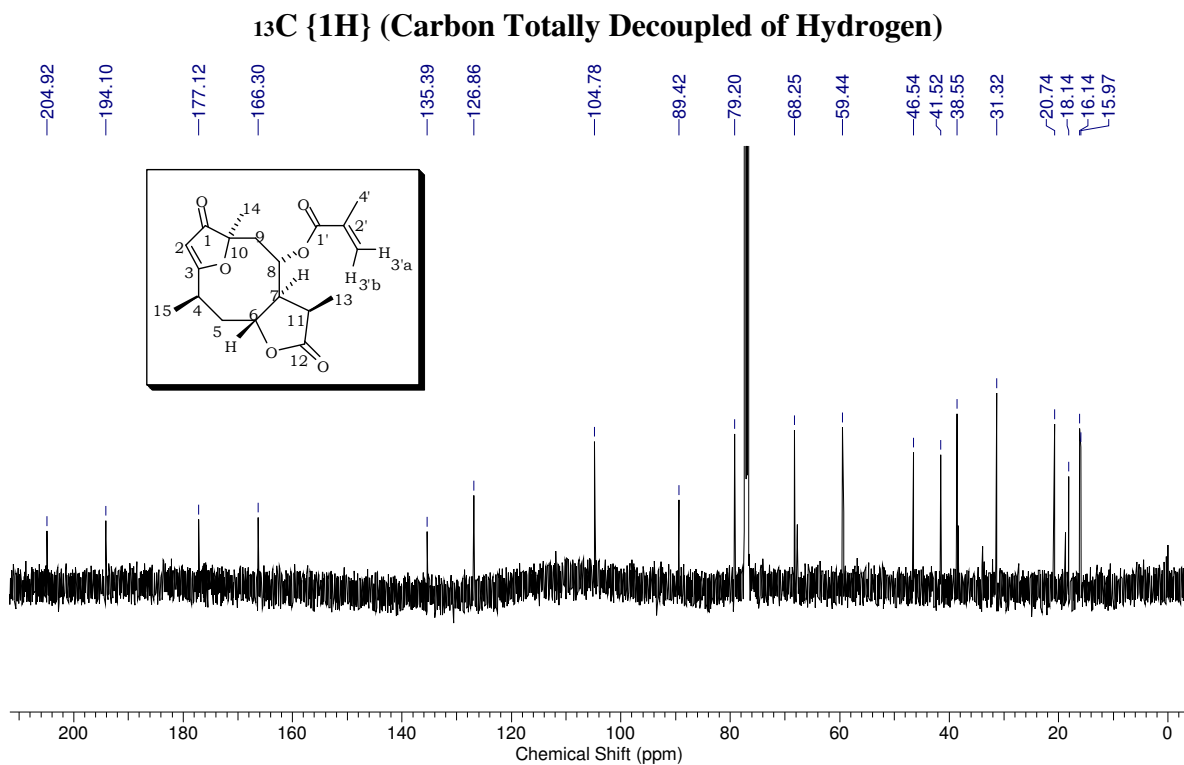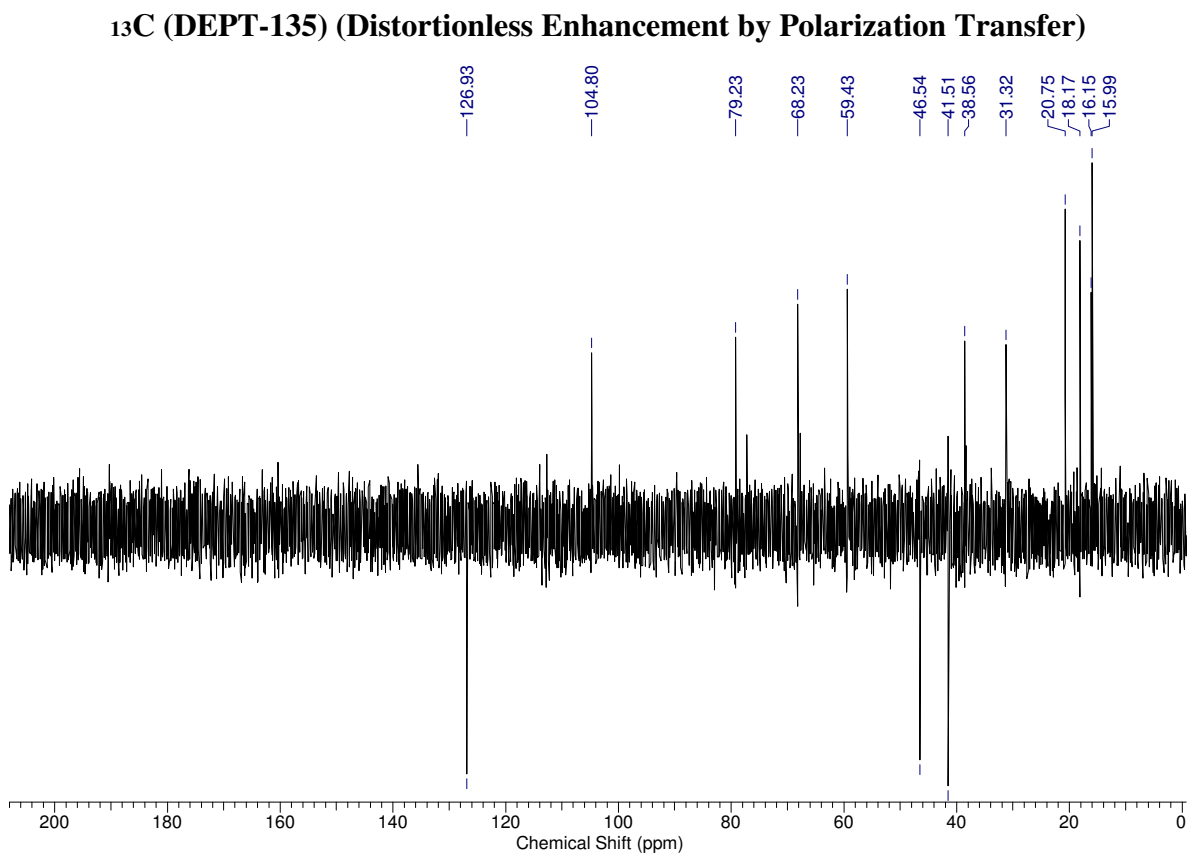

$^{13}\text{C}$  NMR (125 MHz) in  $\text{CDCl}_3$  of compound **12**.

### gCOSY – Compound 12

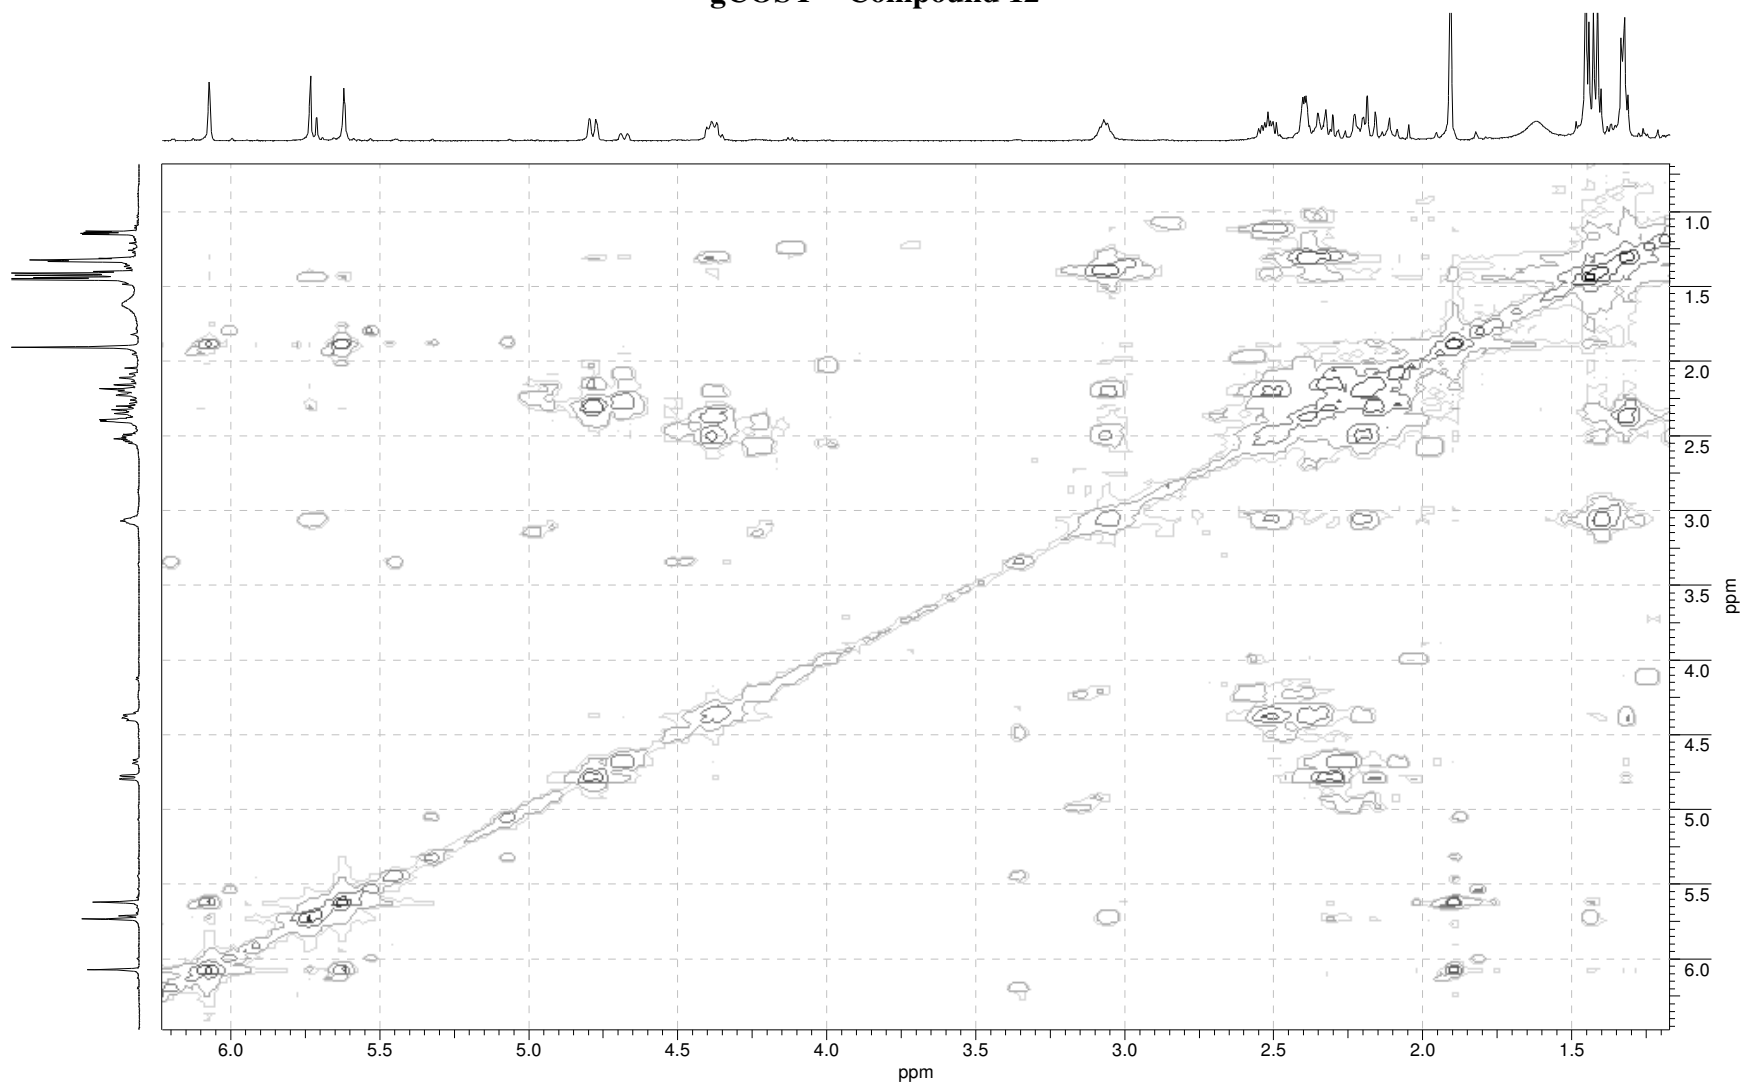

### gHMQC – Compound 12

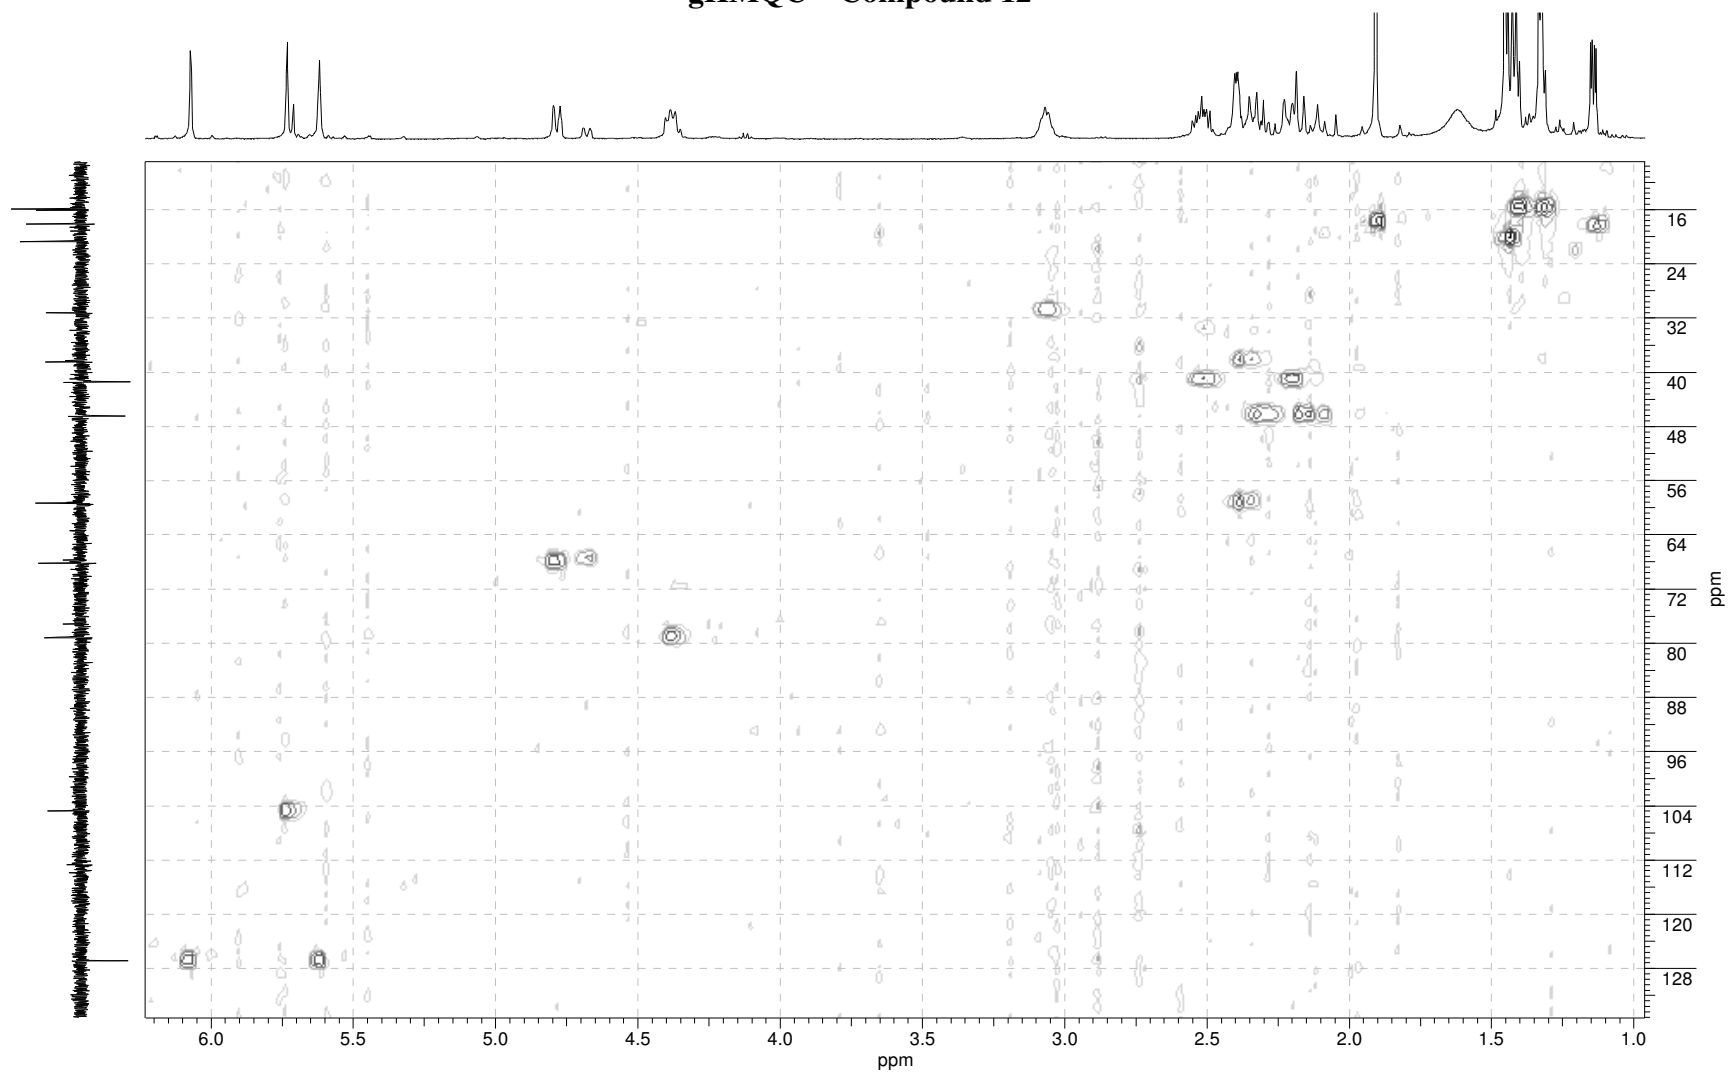

### gHMBC – Compound 12

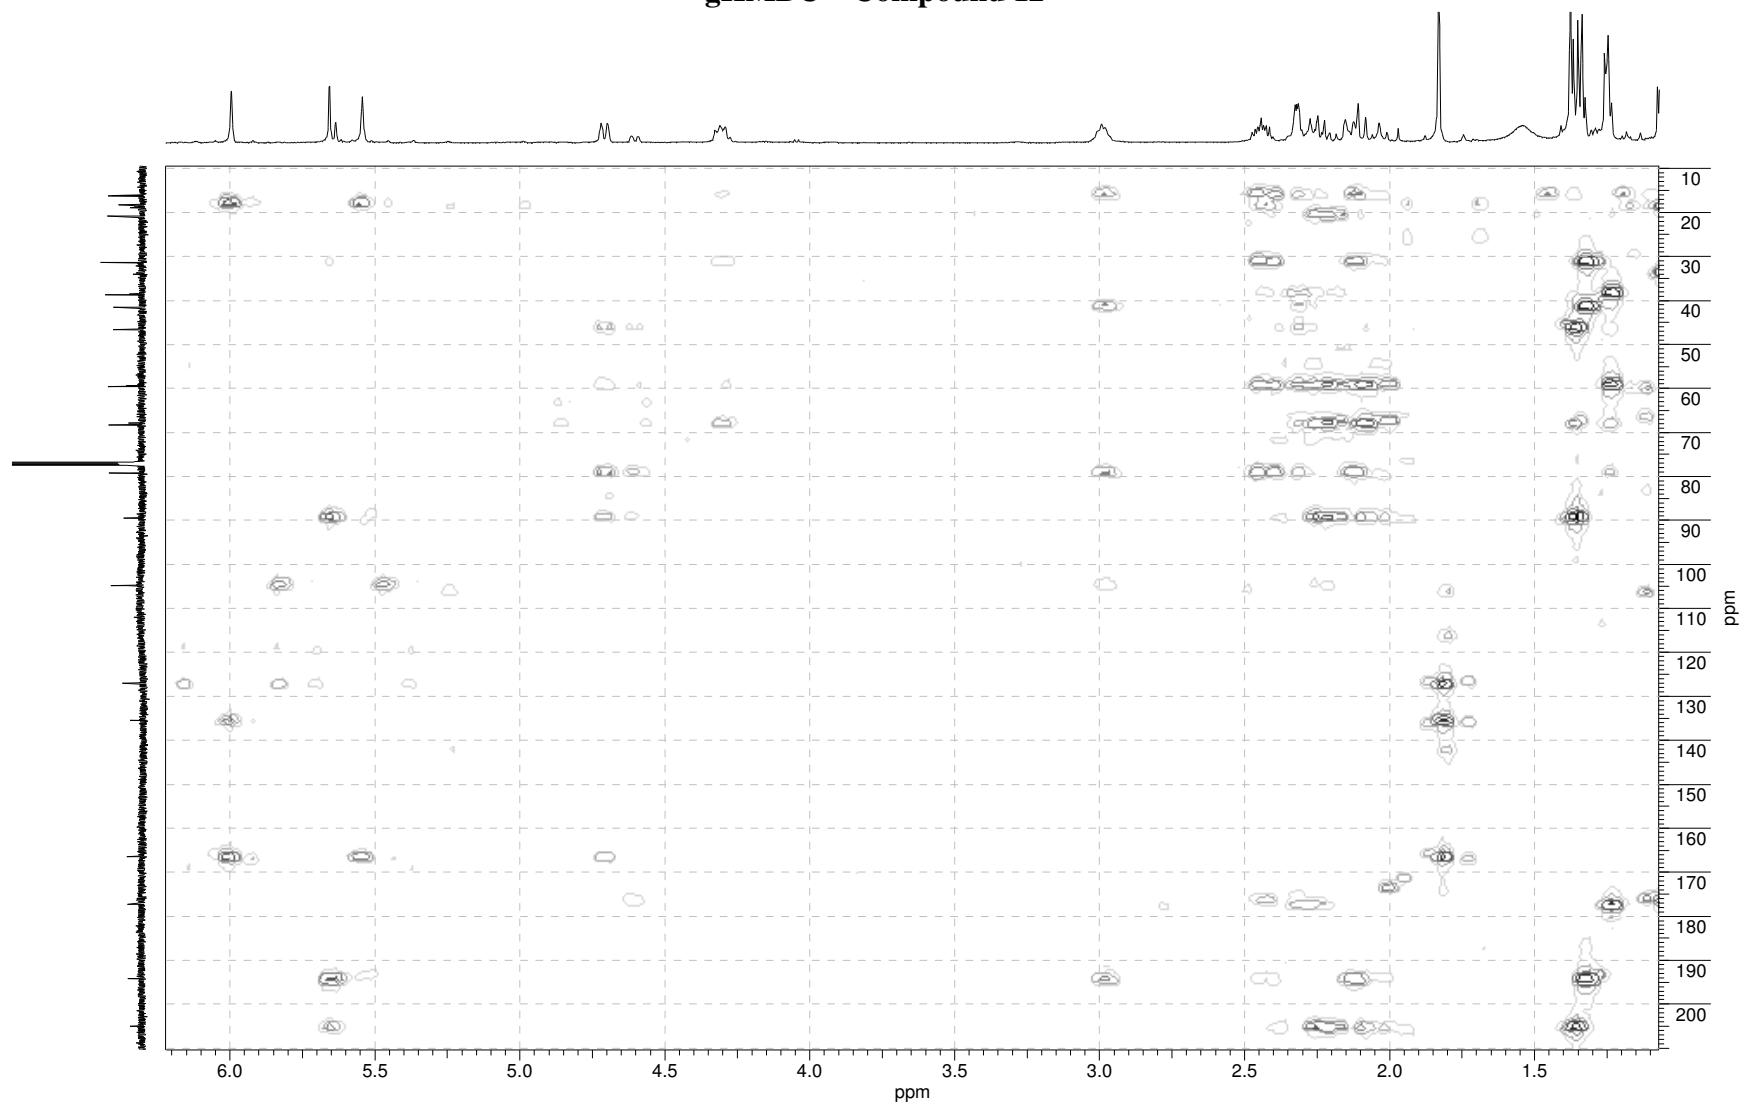

gNOESY – Compound 12 in C<sub>6</sub>D<sub>6</sub>

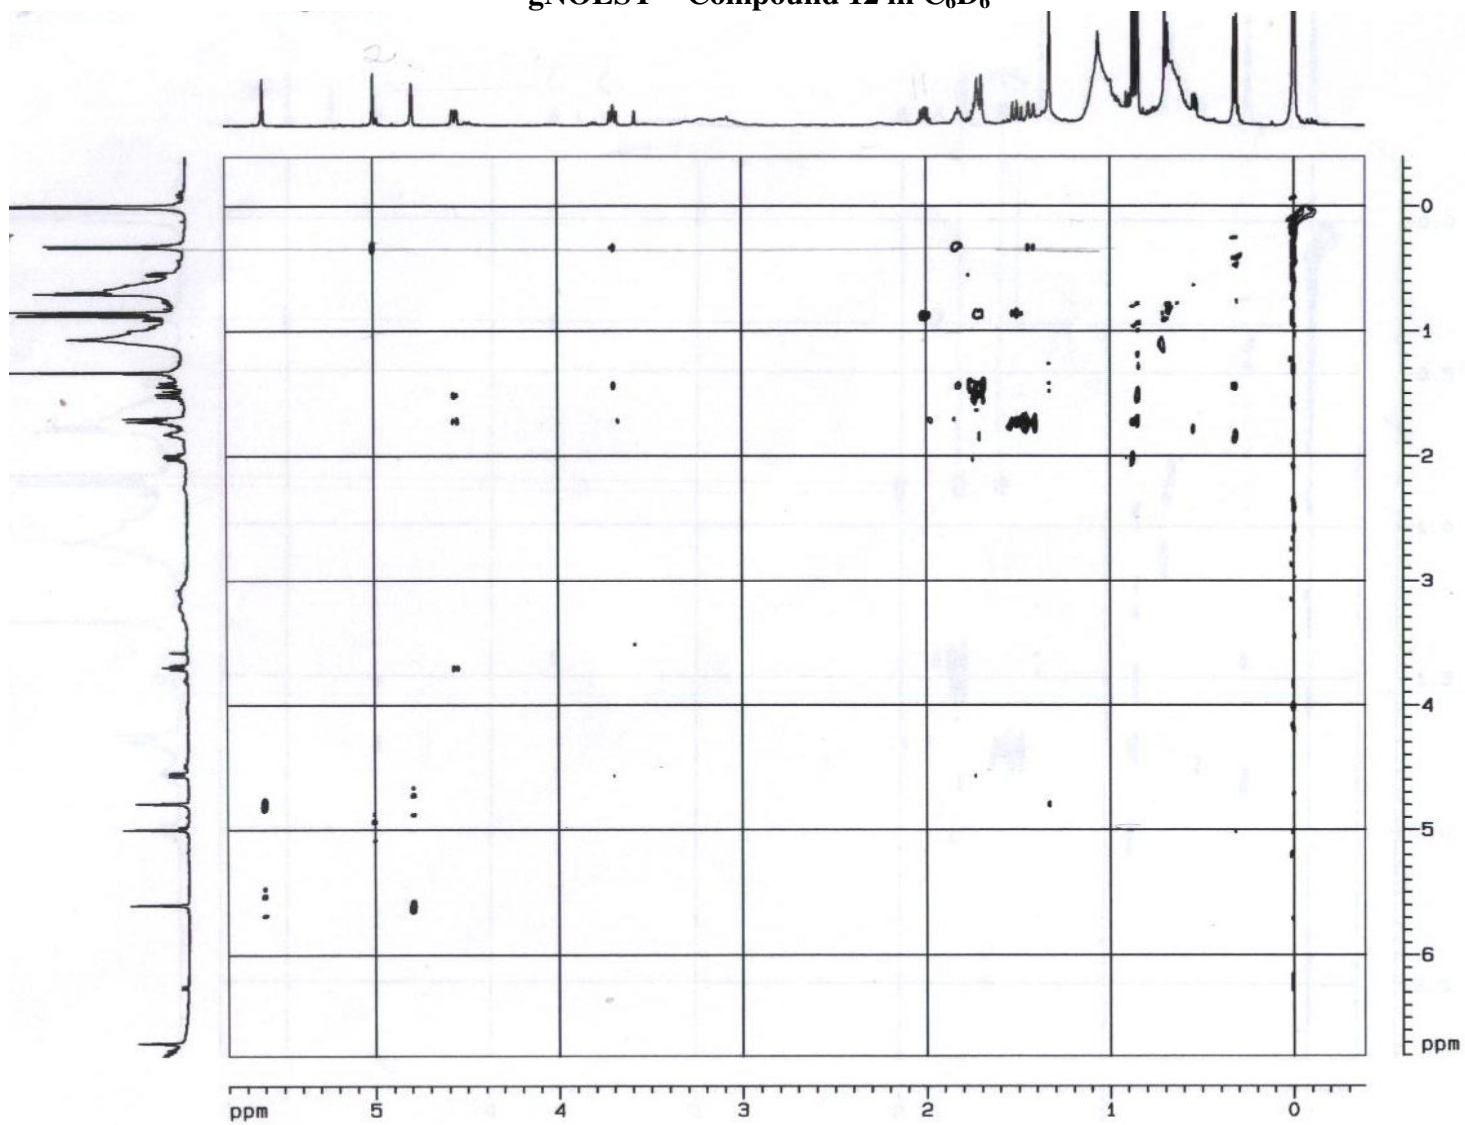

|                        |         |                        |        |              |       |                |      |         |              |
|------------------------|---------|------------------------|--------|--------------|-------|----------------|------|---------|--------------|
| Acquisition Time (sec) | 5.4657  | Comment                | 1H     |              |       |                |      |         |              |
| Frequency (MHz)        | 300.13  | Nucleus                | 1H     |              |       |                |      |         |              |
| Number of Transients   | 48      | Original Points Count  | 32768  | Points Count | 32768 | Pulse Sequence | zg30 | Solvent | CHLOROFORM-D |
| Sweep Width (Hz)       | 5995.20 | Temperature (degree C) | 19.200 |              |       |                |      |         |              |

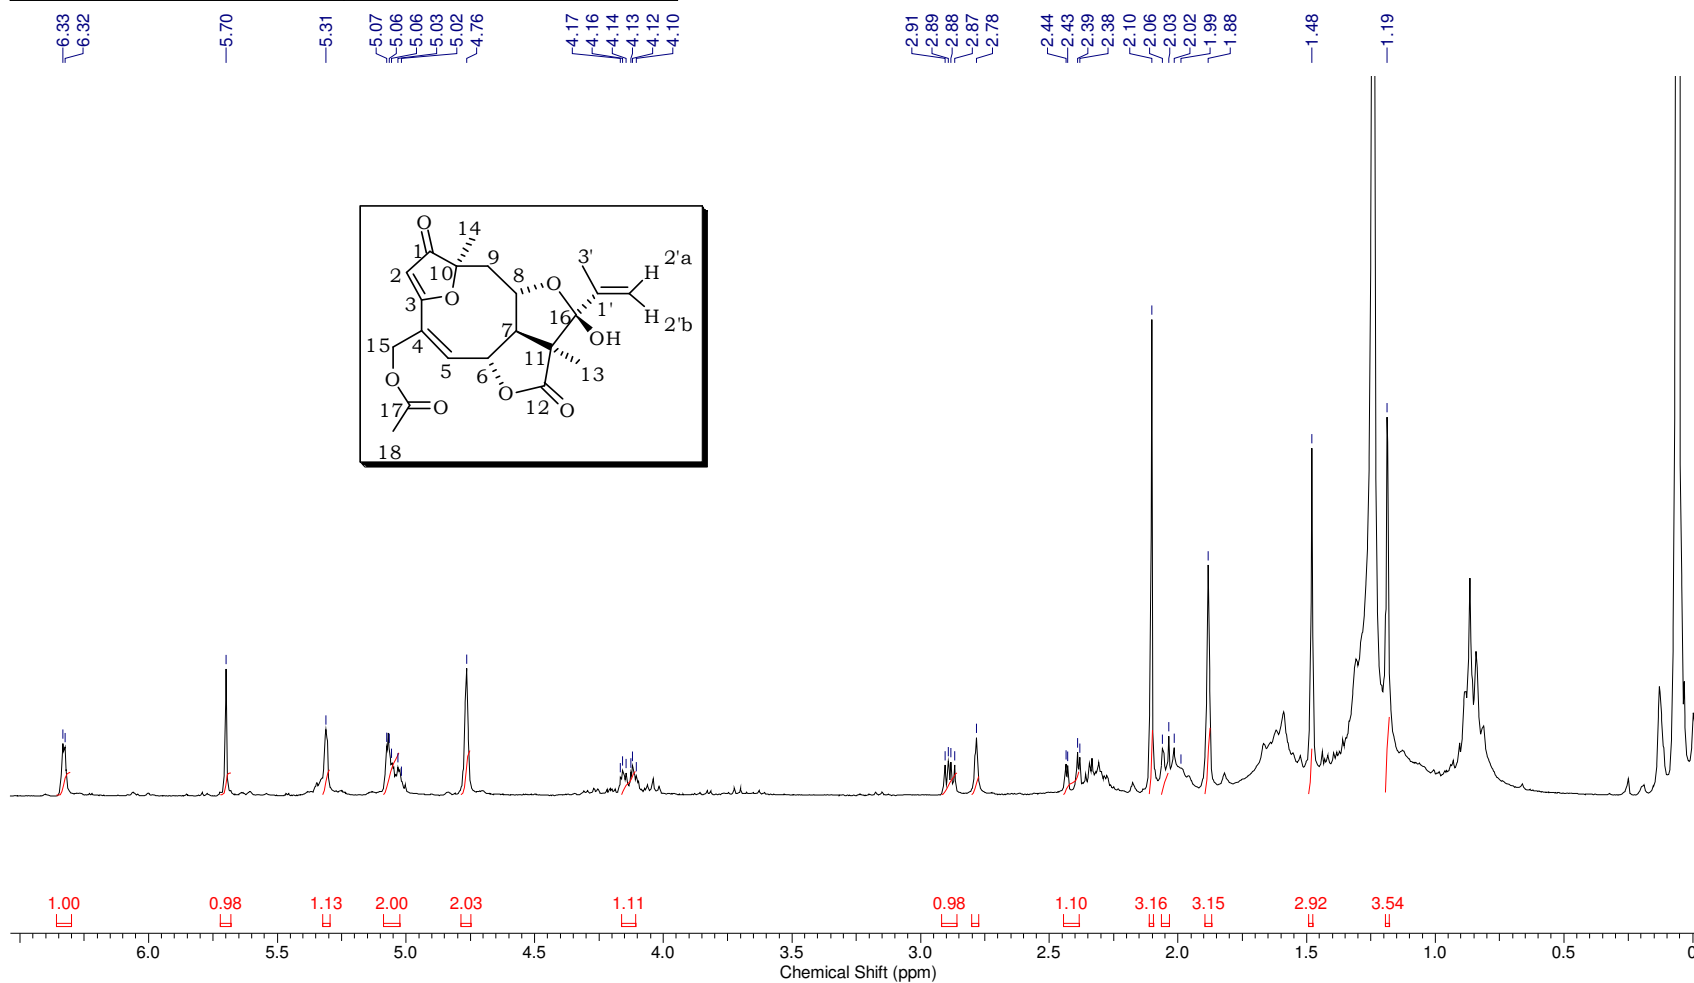

$^1\text{H}$  NMR (500 MHz) in  $\text{CDCl}_3$  of compound **13**.

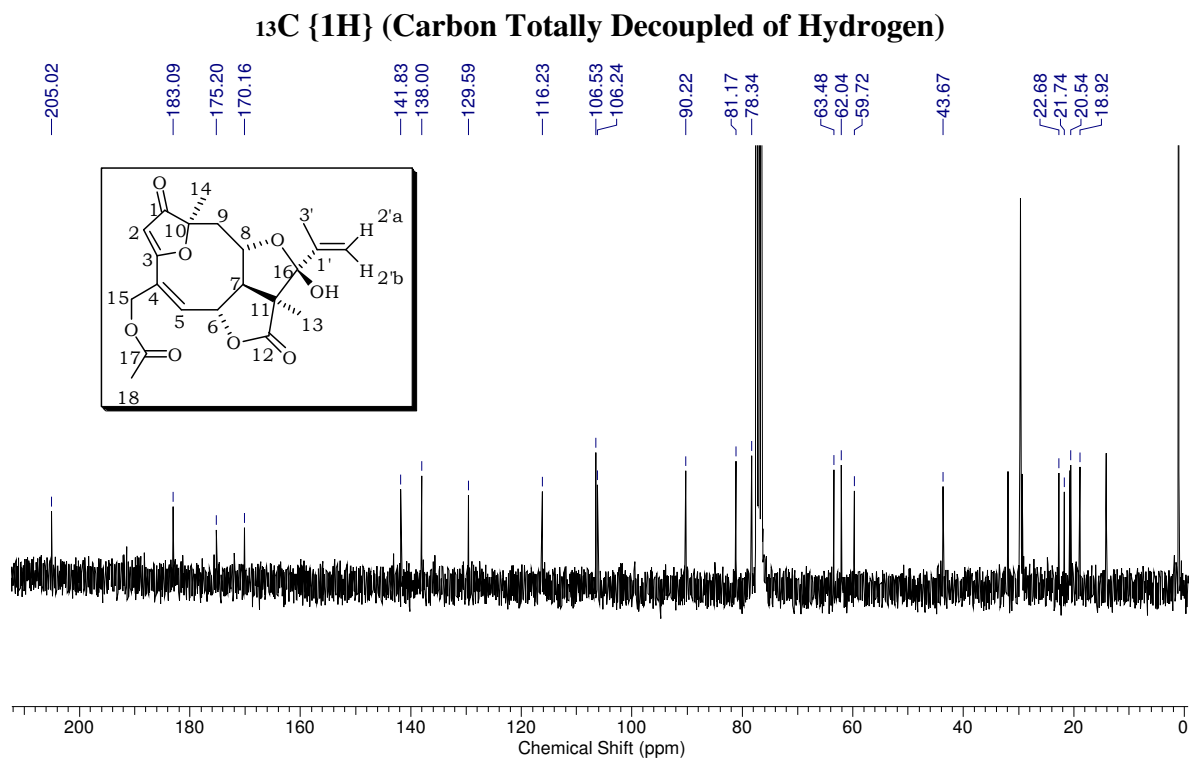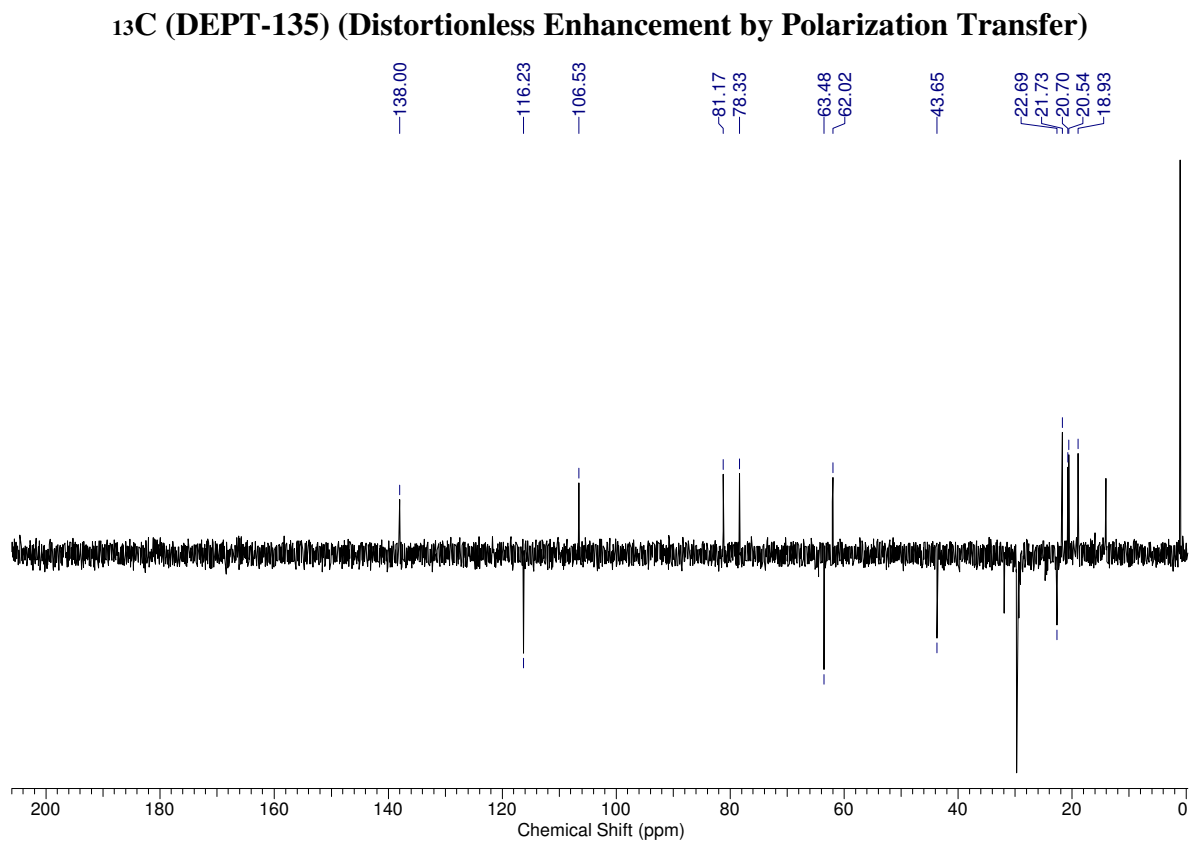

$^{13}\text{C}$  NMR (125 MHz) in  $\text{CDCl}_3$  of compound **13**.



### gCOSY – Compound 13

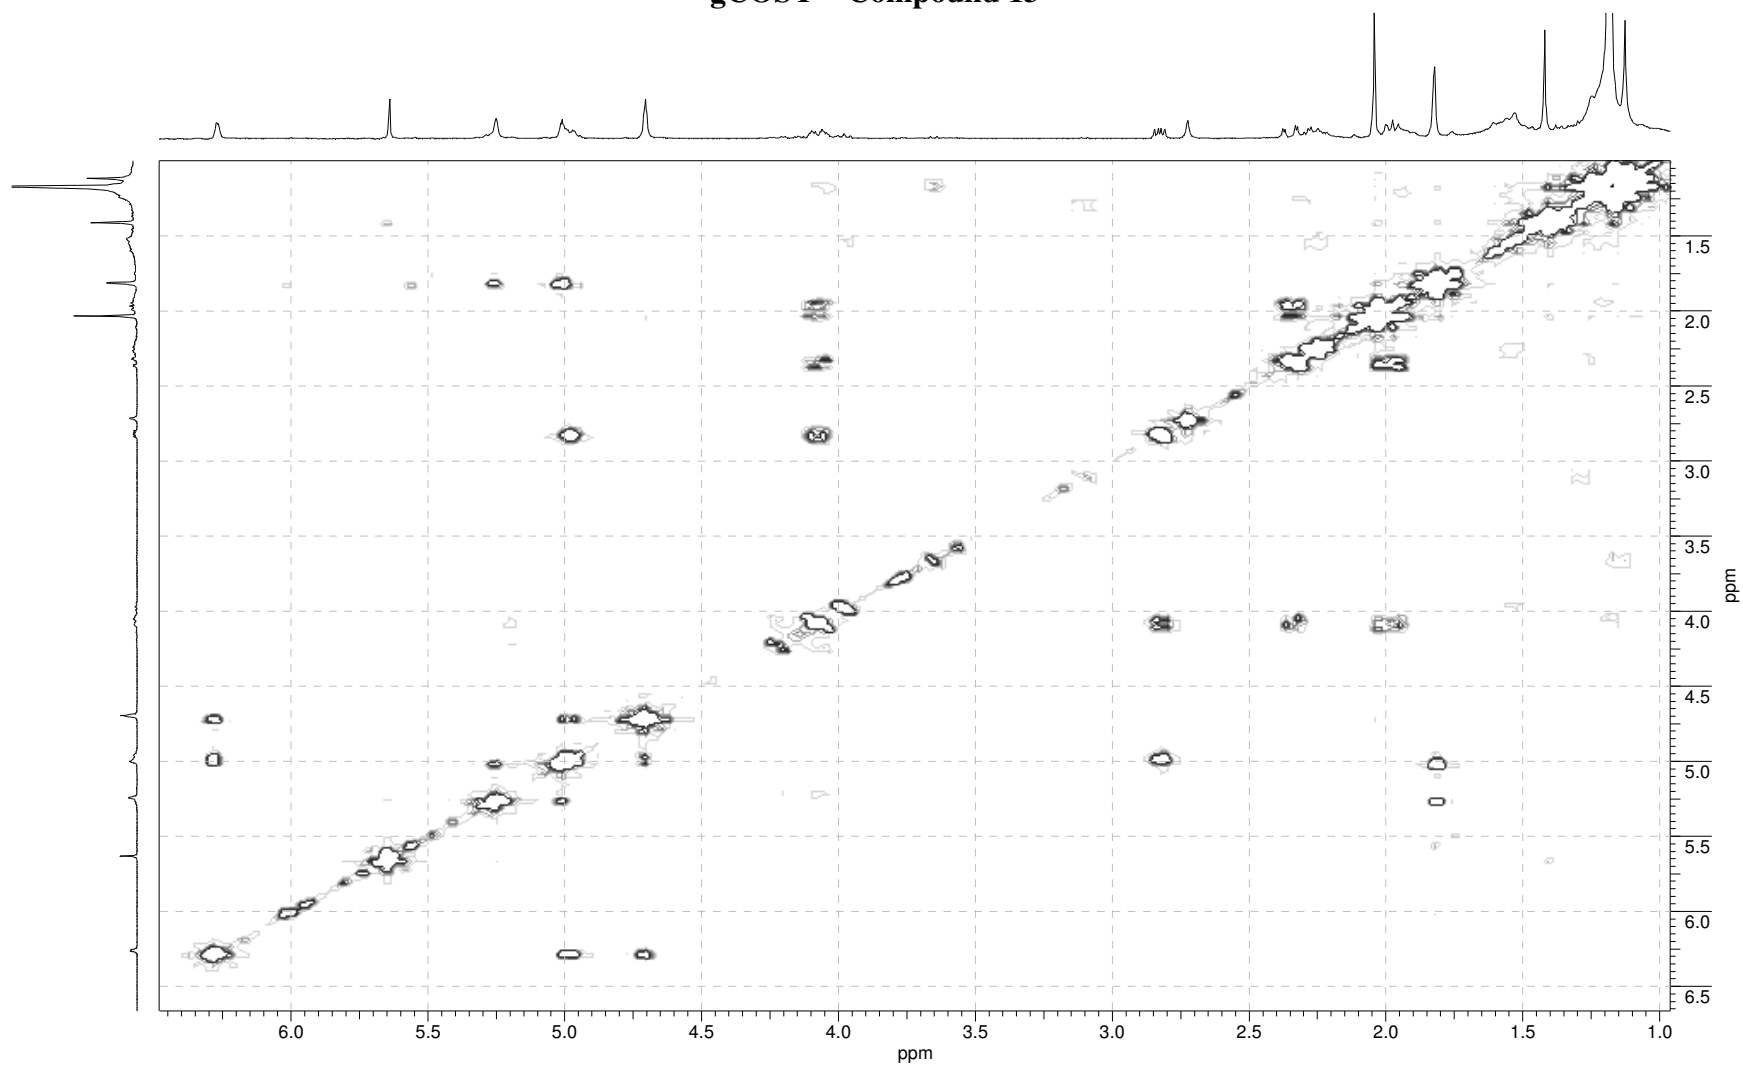

### gHMQC – Compound 13

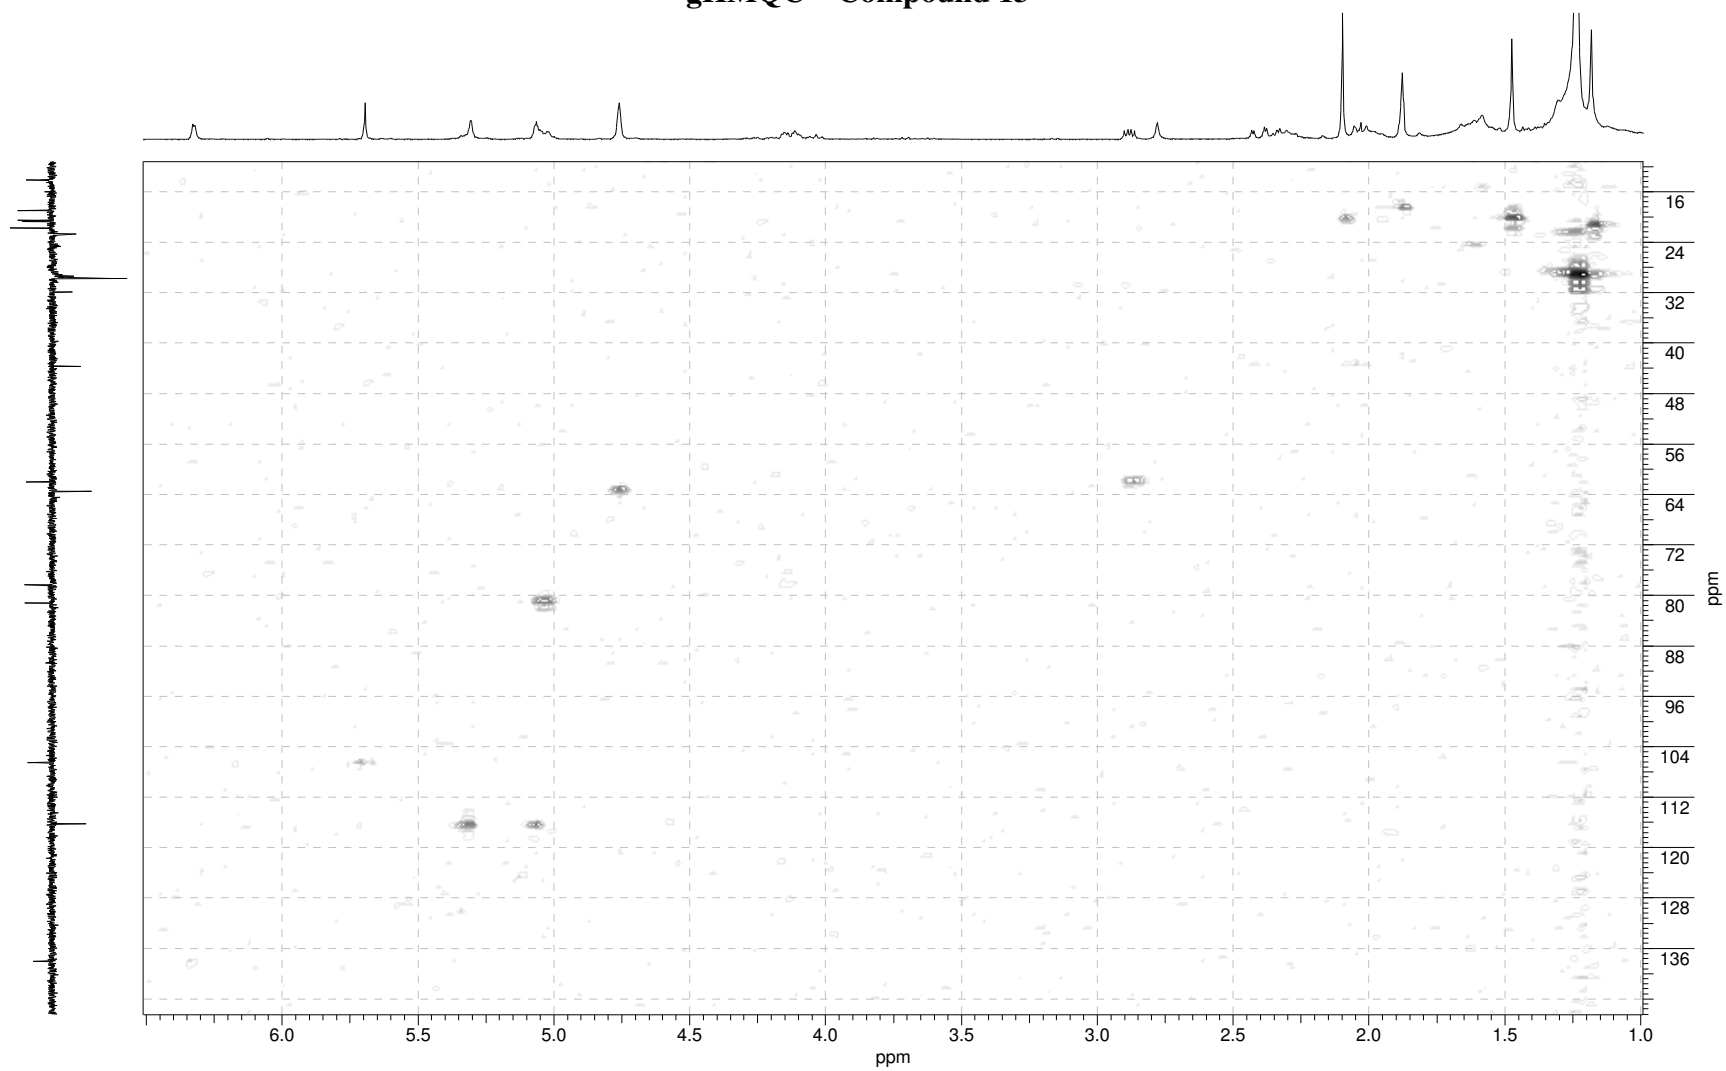

### gHMBC – Compound 13

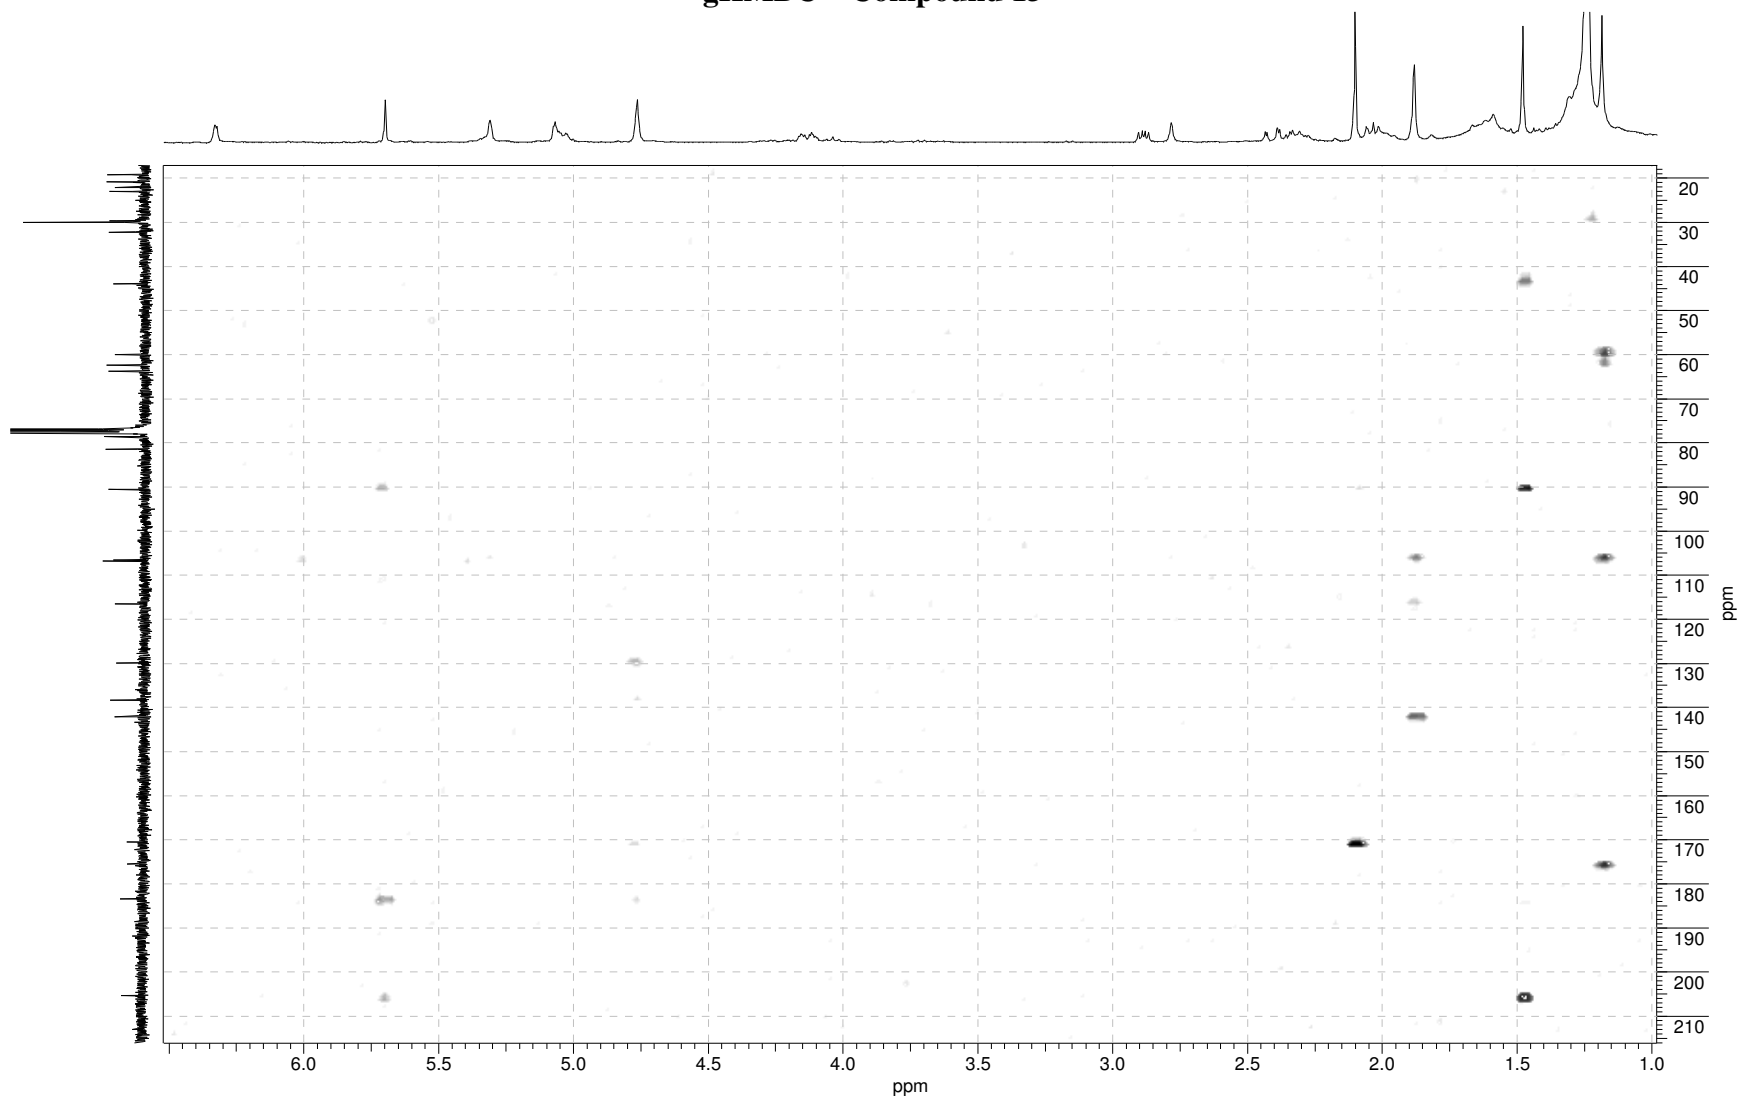

|                               |              |                         |                      |                             |      |
|-------------------------------|--------------|-------------------------|----------------------|-----------------------------|------|
| <b>Acquisition Time (sec)</b> | 7.7070       | <b>Comment</b>          | Imported from UXMNR. |                             |      |
| <b>Frequency (MHz)</b>        | 500.13       | <b>Nucleus</b>          | 1H                   | <b>Number of Transients</b> | 2    |
| <b>Original Points Count</b>  | 65536        | <b>Points Count</b>     | 32768                | <b>Pulse Sequence</b>       | zg30 |
| <b>Solvent</b>                | CHLOROFORM-D | <b>Sweep Width (Hz)</b> | 8503.40              |                             |      |
| <b>Temperature (degree C)</b> | 27.000       |                         |                      |                             |      |

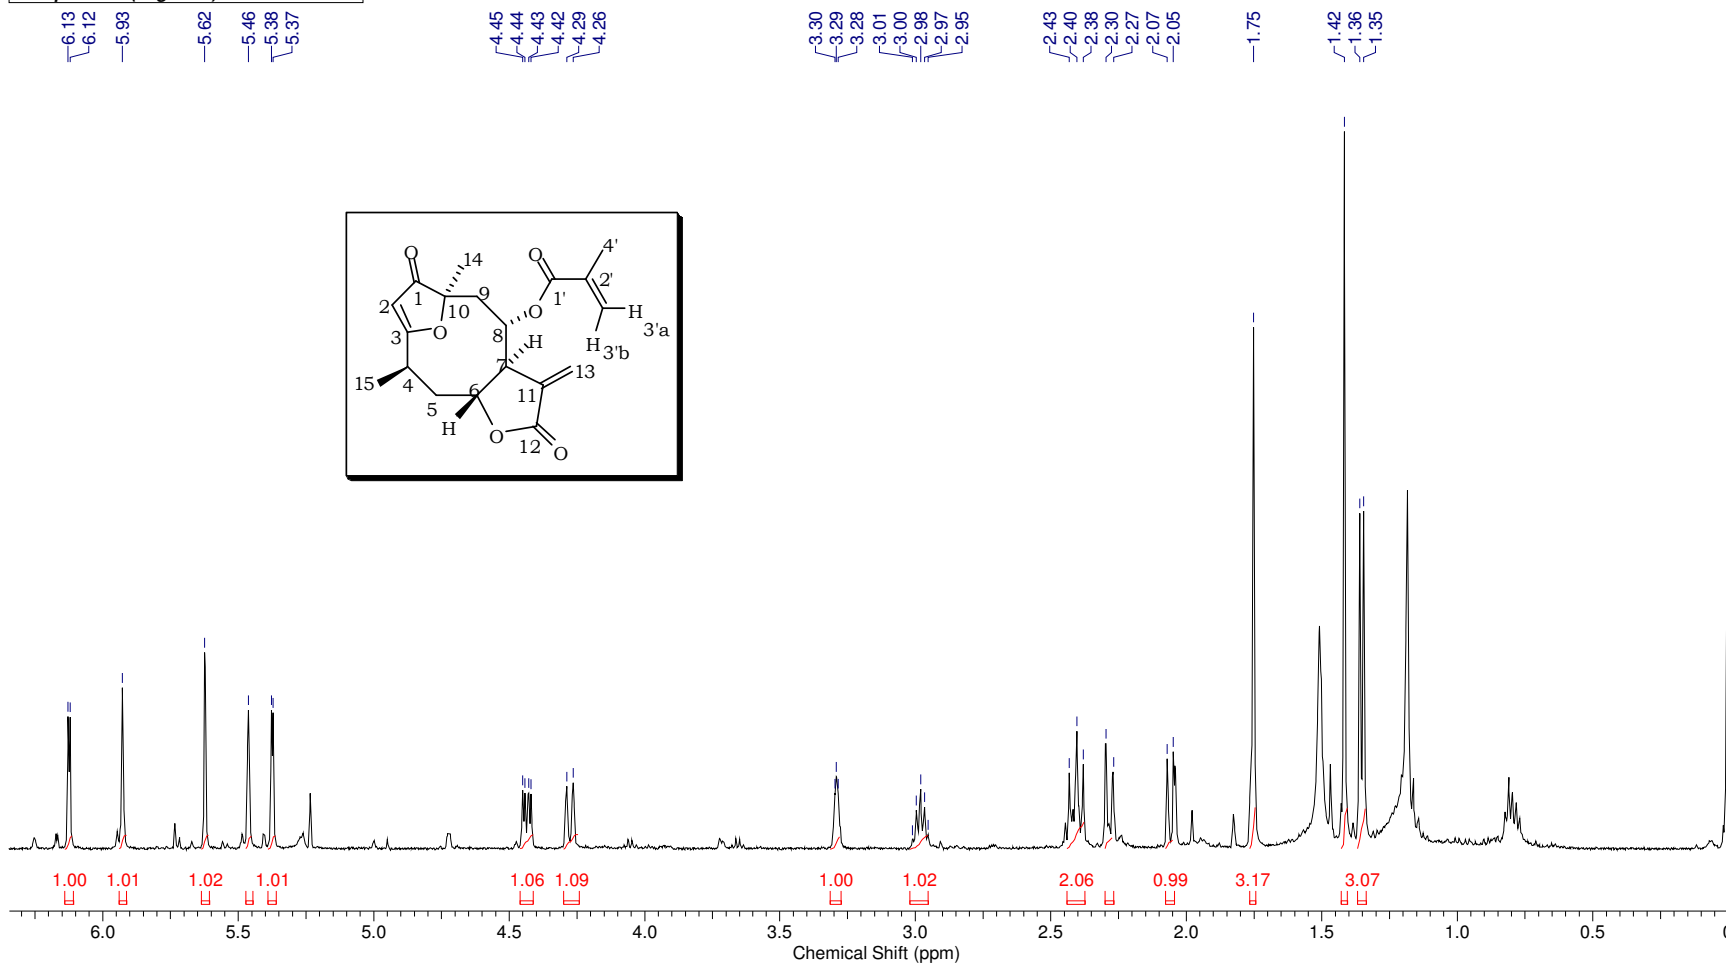

<sup>1</sup>H NMR (500 MHz) in CDCl<sub>3</sub> of compound **14**.

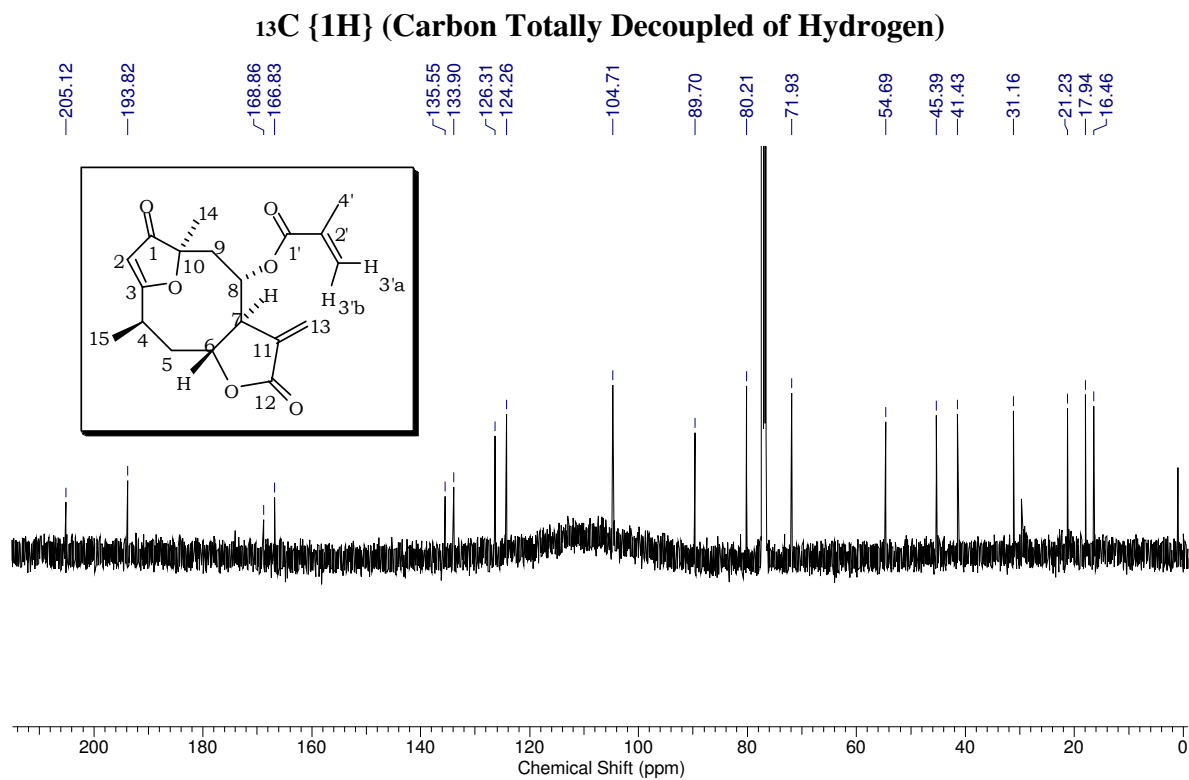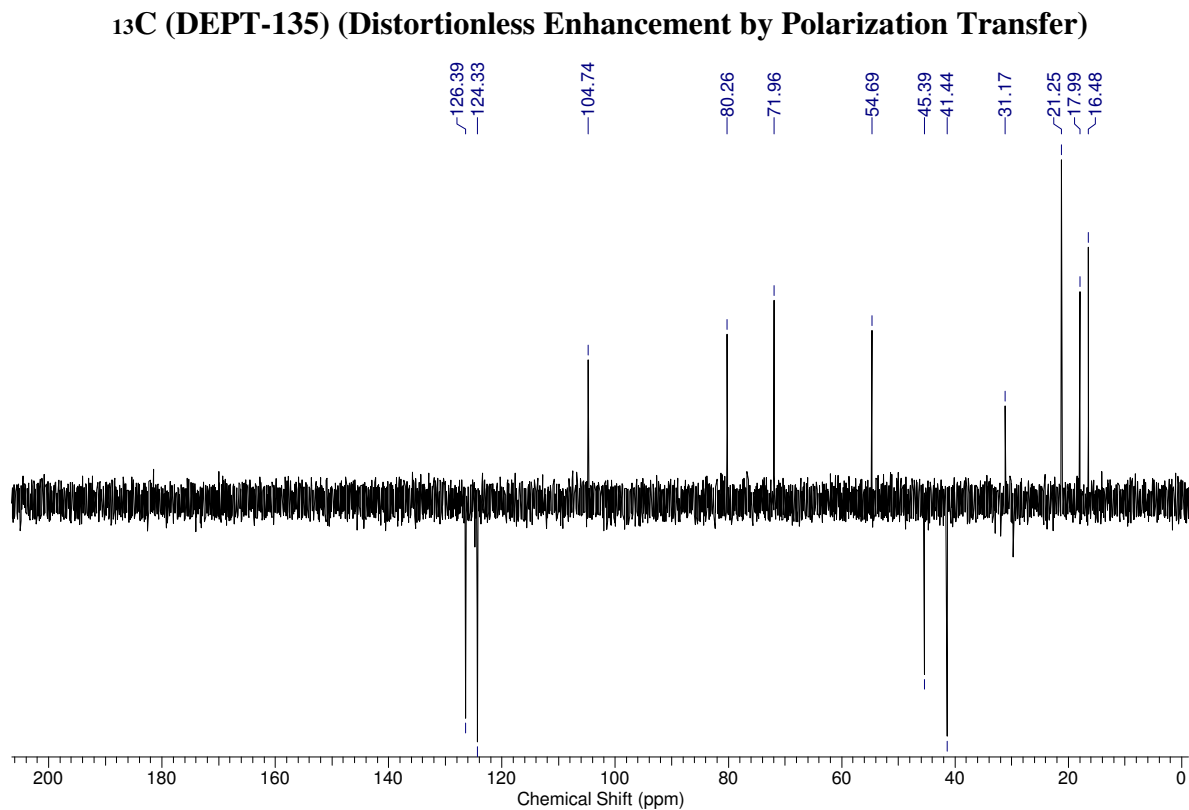

$^{13}\text{C}$  NMR (125 MHz) in  $\text{CDCl}_3$  of compound **14**.

### gCOSY – Compound 14

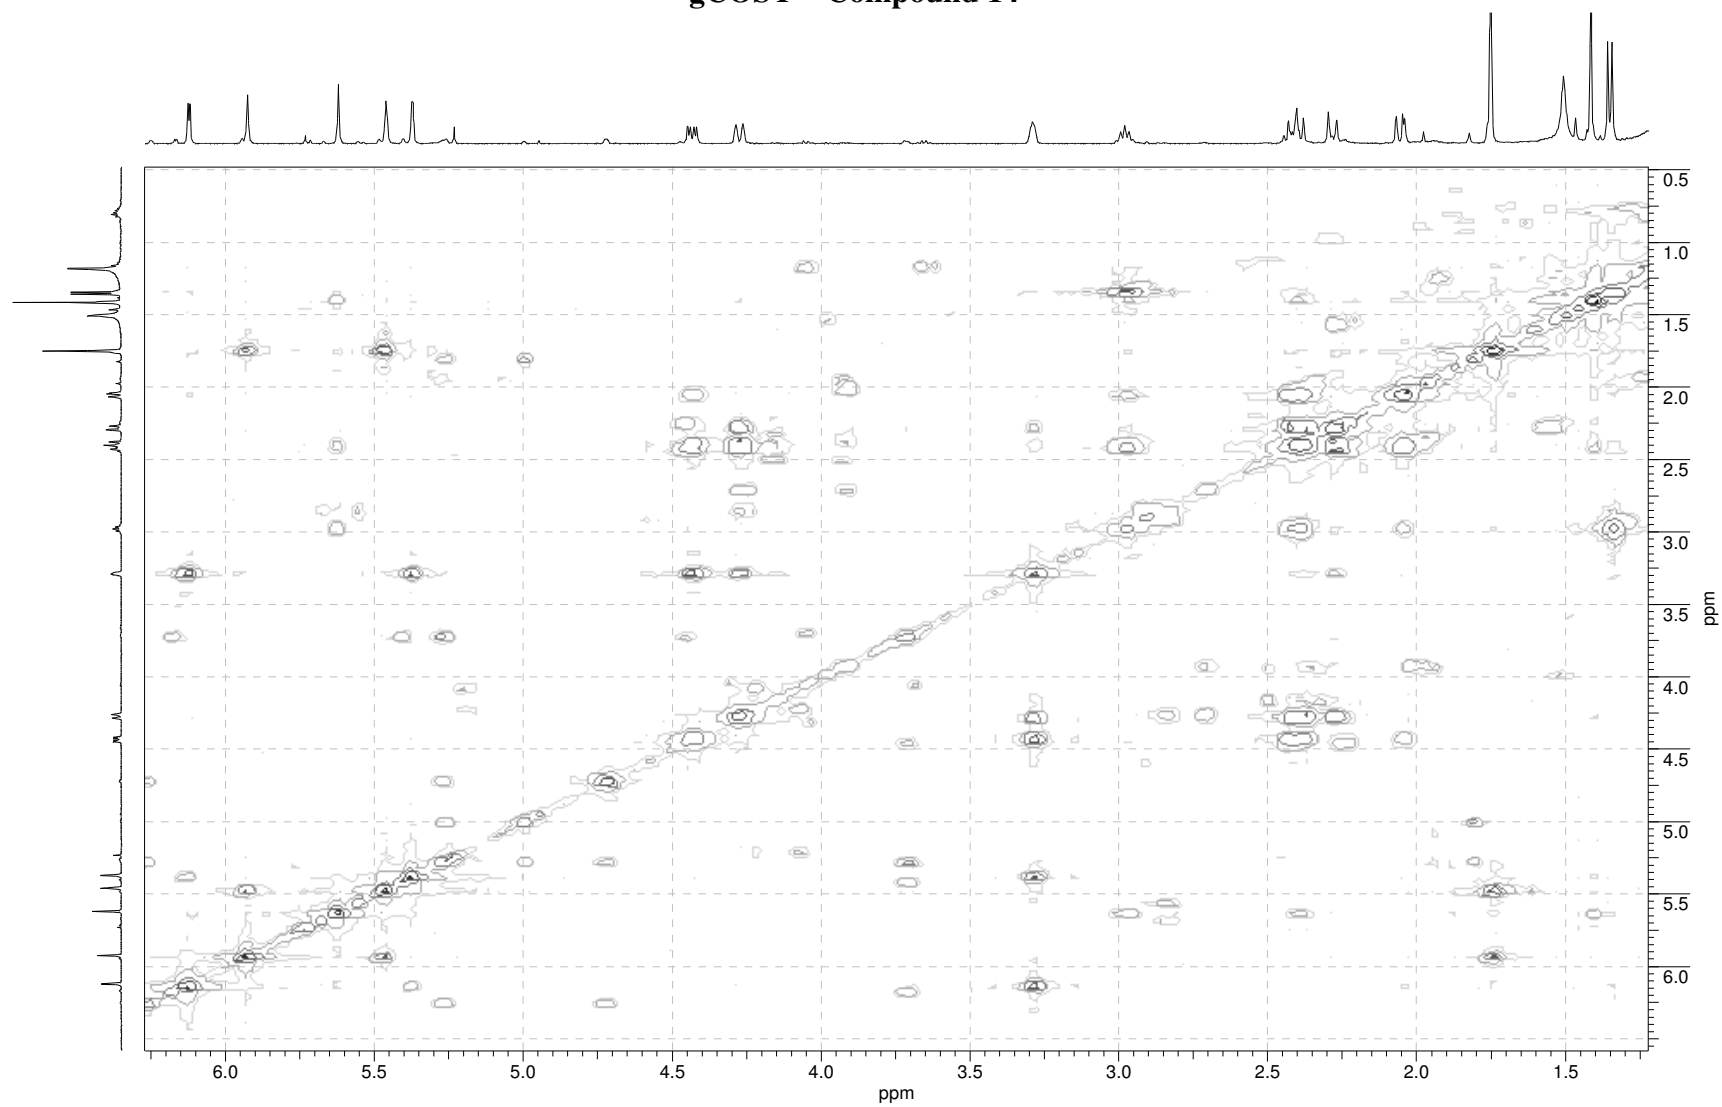

### gHMQC – Compound 14

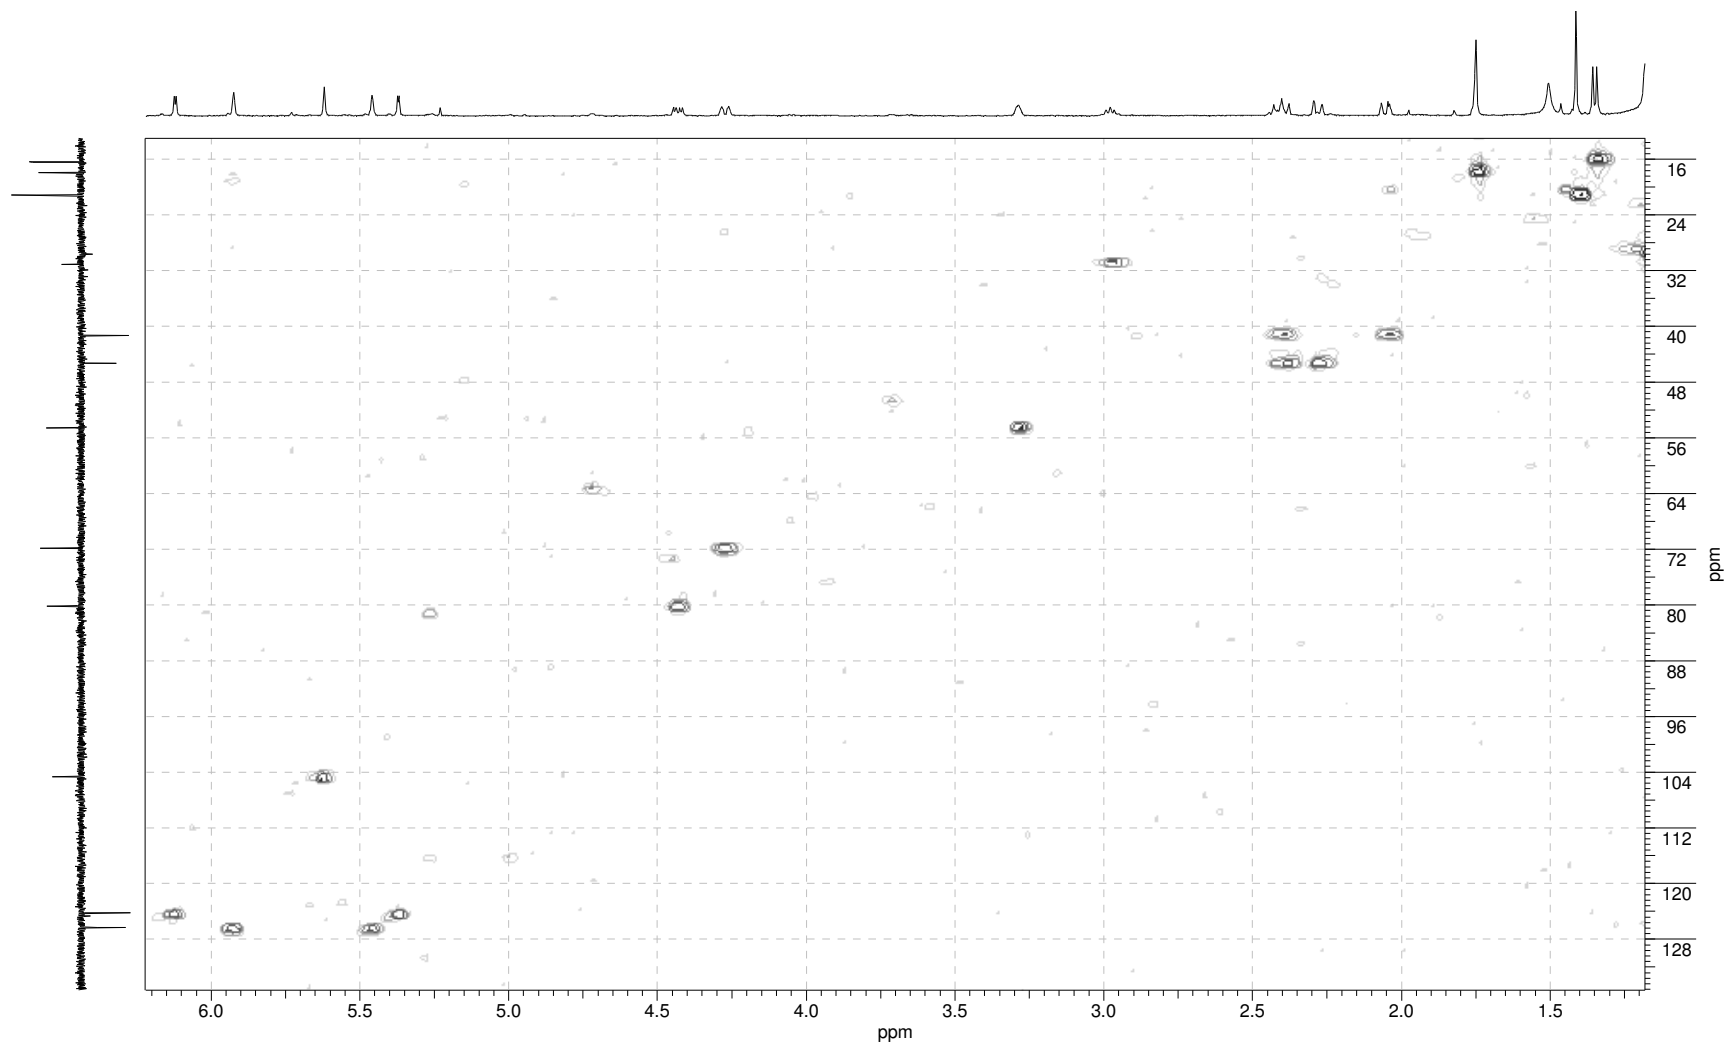

### gHMBC – Compound 14

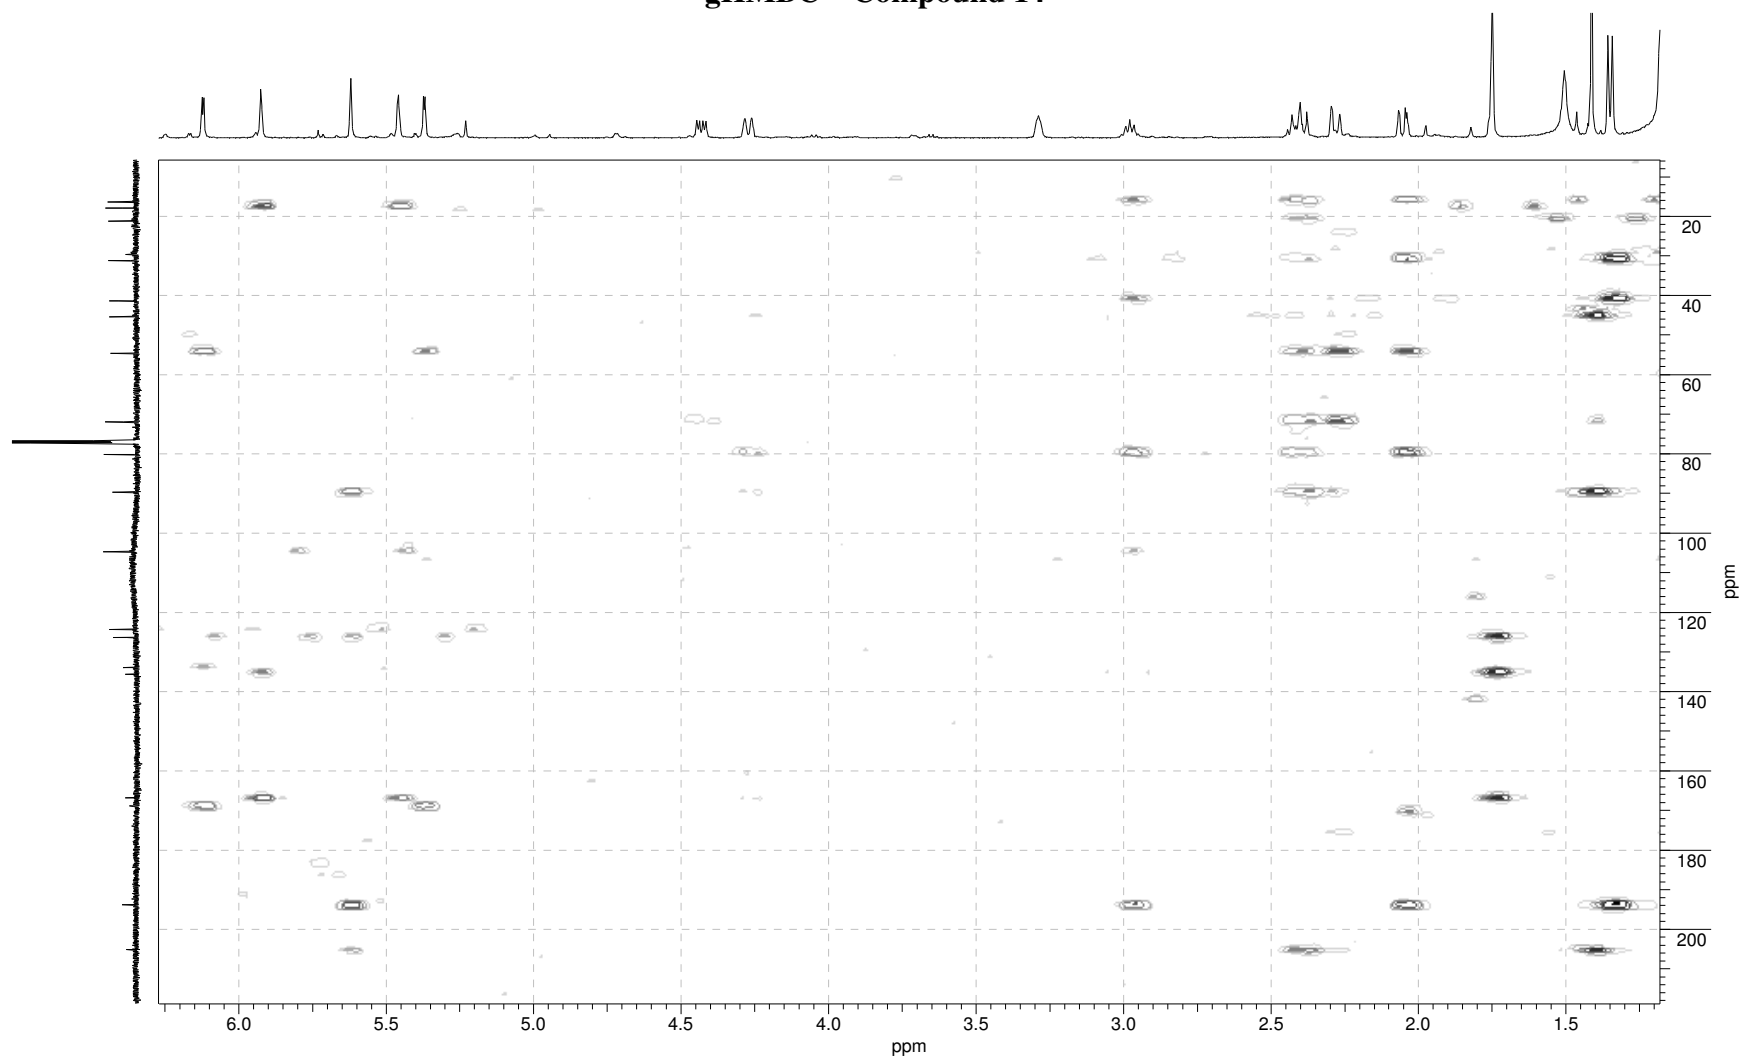



### gNOESY – Compound 14

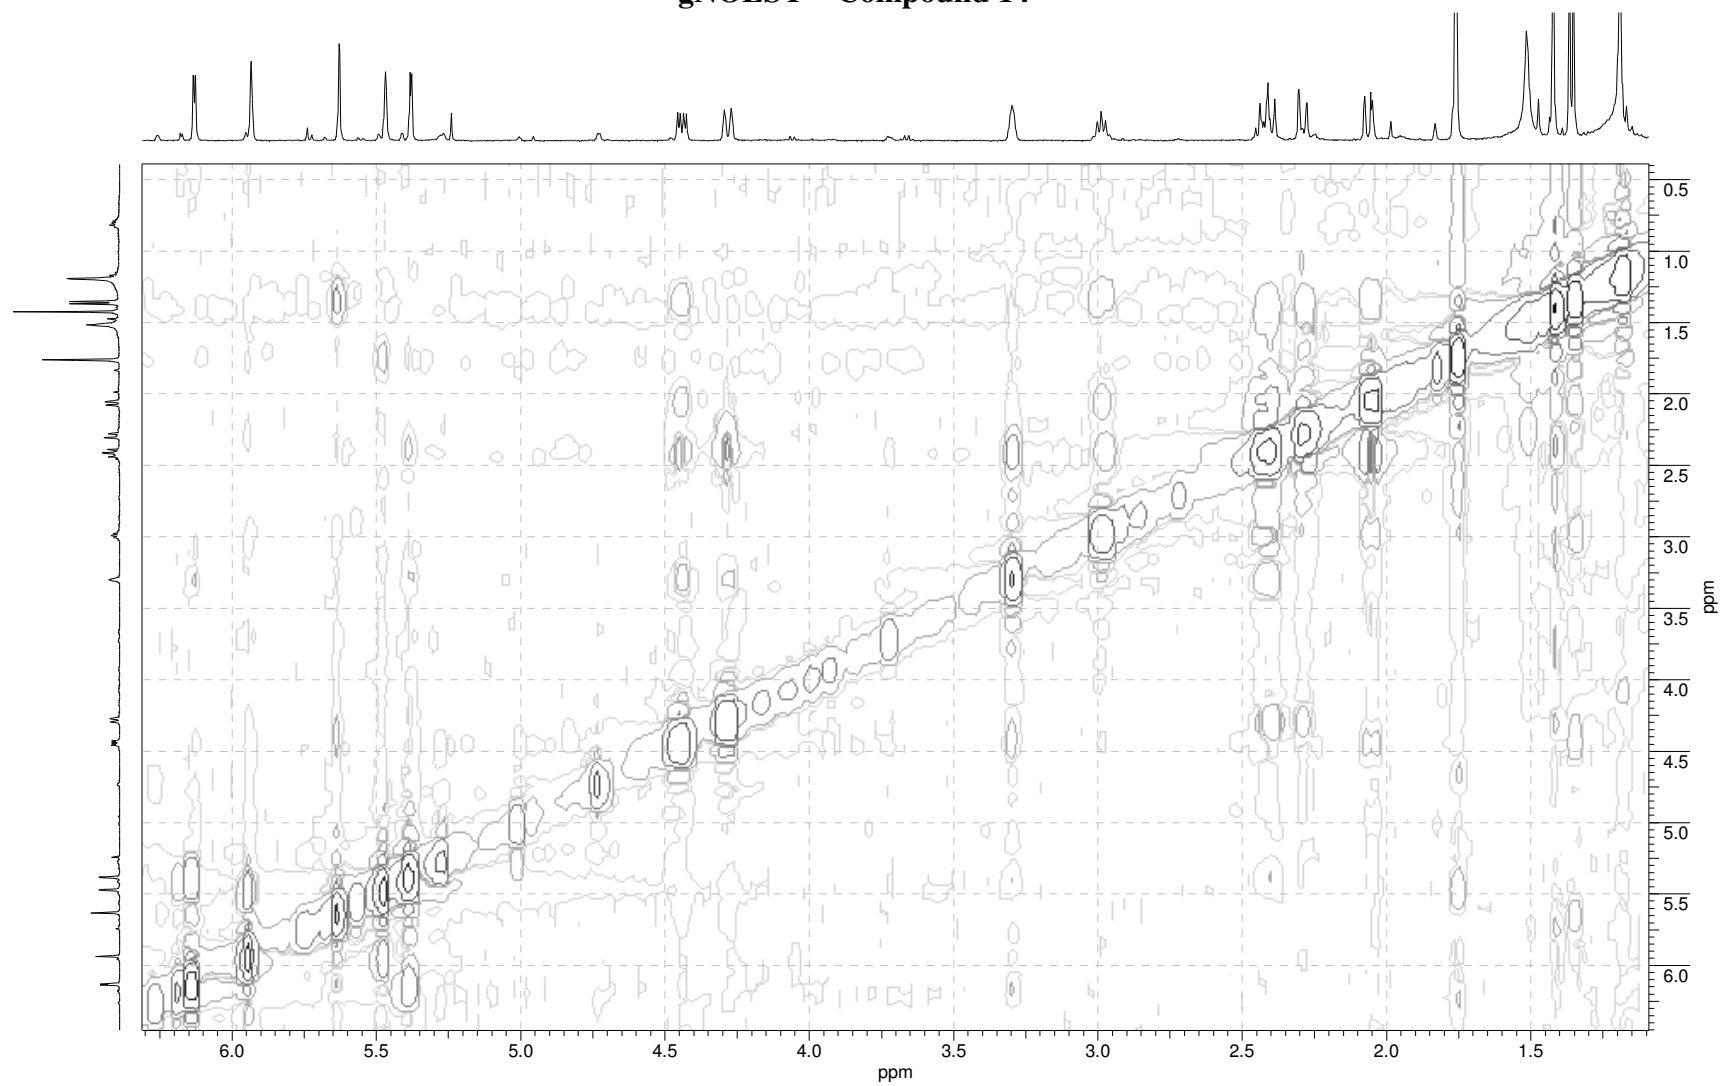

|                        |         |                        |                      |                       |              |
|------------------------|---------|------------------------|----------------------|-----------------------|--------------|
| Acquisition Time (sec) | 7.7070  | Comment                | Imported from UXMNR. |                       |              |
| Frequency (MHz)        | 500.13  |                        |                      |                       |              |
| Nucleus                | 1H      | Number of Transients   | 16                   | Original Points Count | 65536        |
| Points Count           | 32768   | Pulse Sequence         | zg30                 | Solvent               | CHLOROFORM-D |
| Sweep Width (Hz)       | 8503.40 | Temperature (degree C) | 27.000               |                       |              |

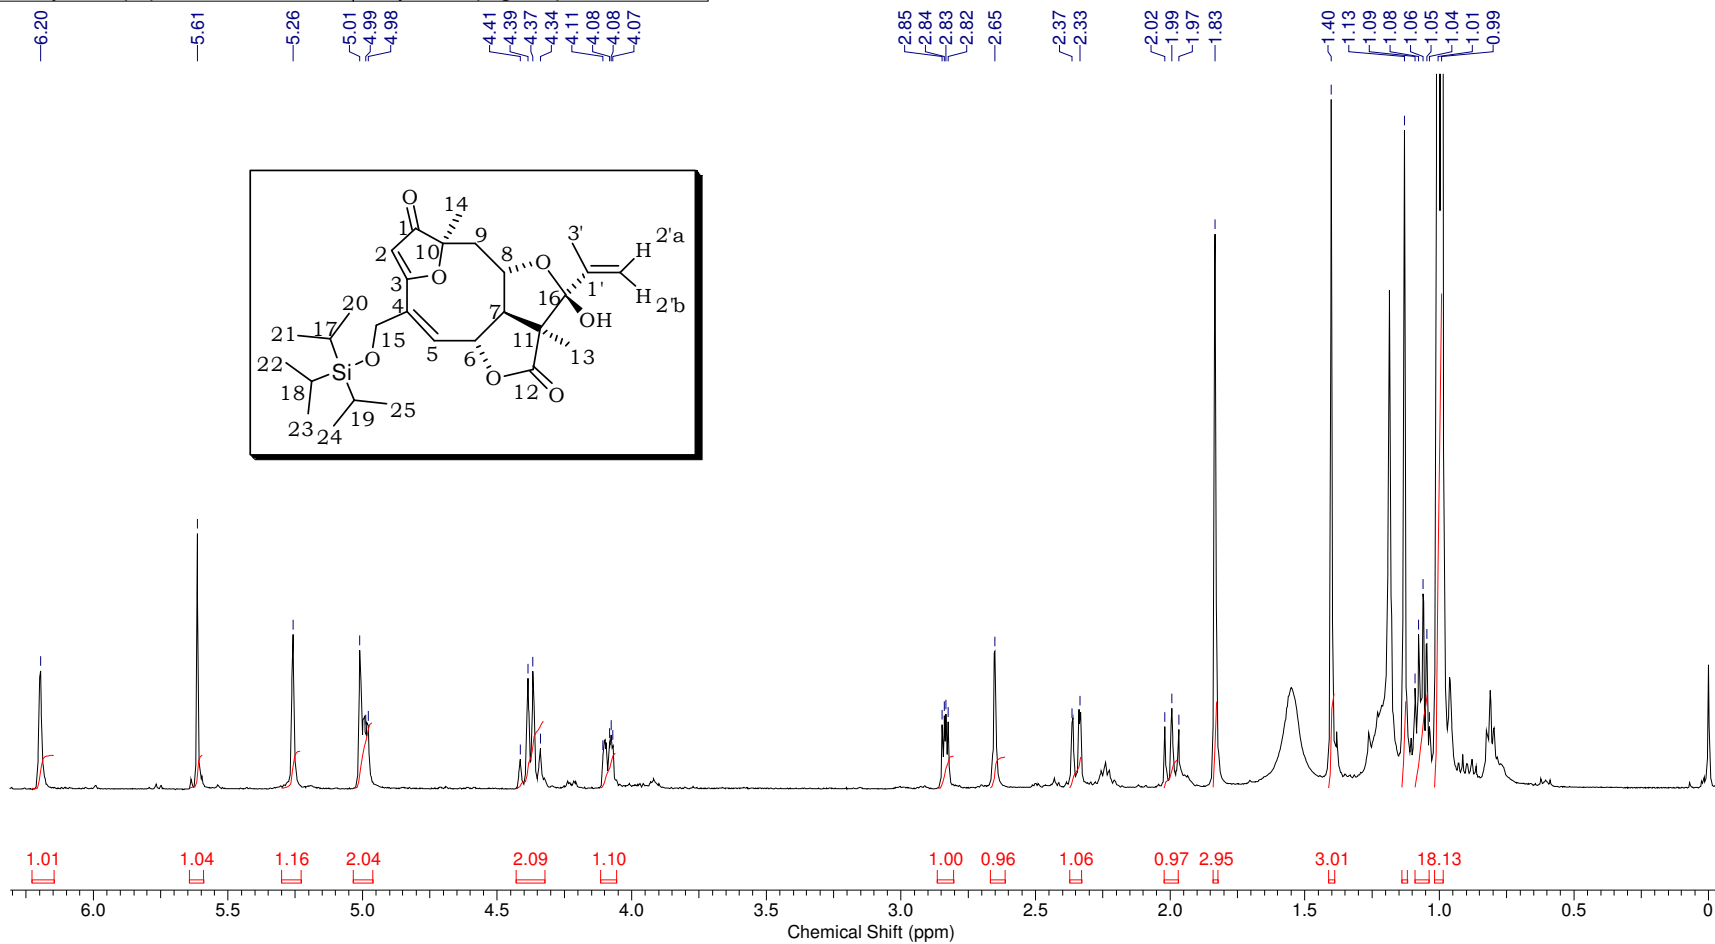

$^1\text{H}$  NMR (500 MHz) in  $\text{CDCl}_3$  of compound **15**.

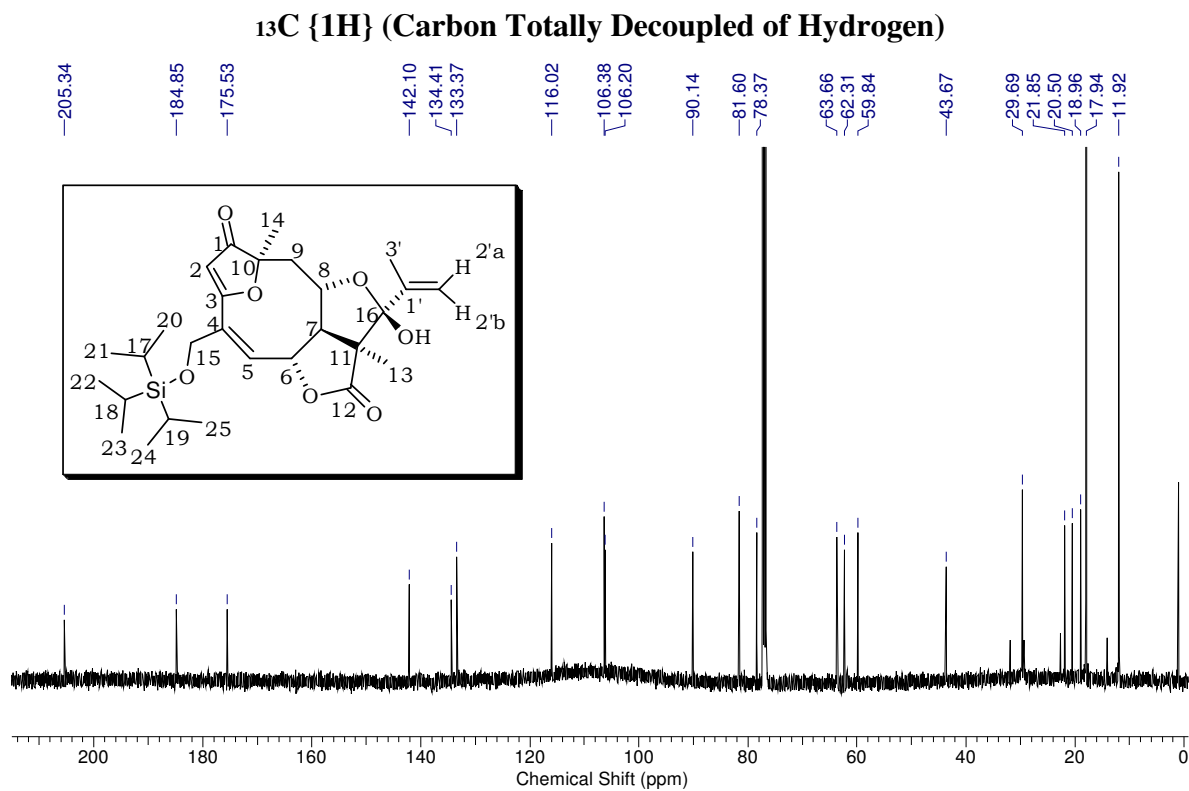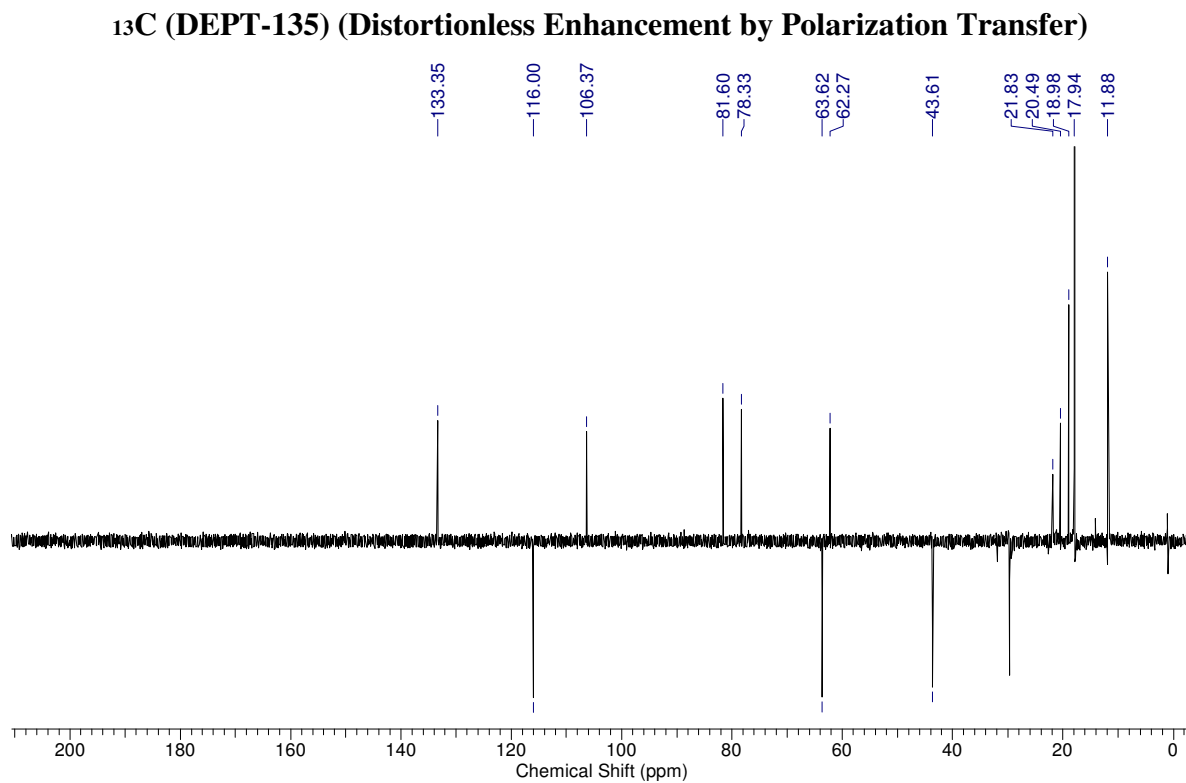

$^{13}\text{C}$  NMR (125 MHz) in  $\text{CDCl}_3$  of compound **15**.

### gCOSY – Compound 15

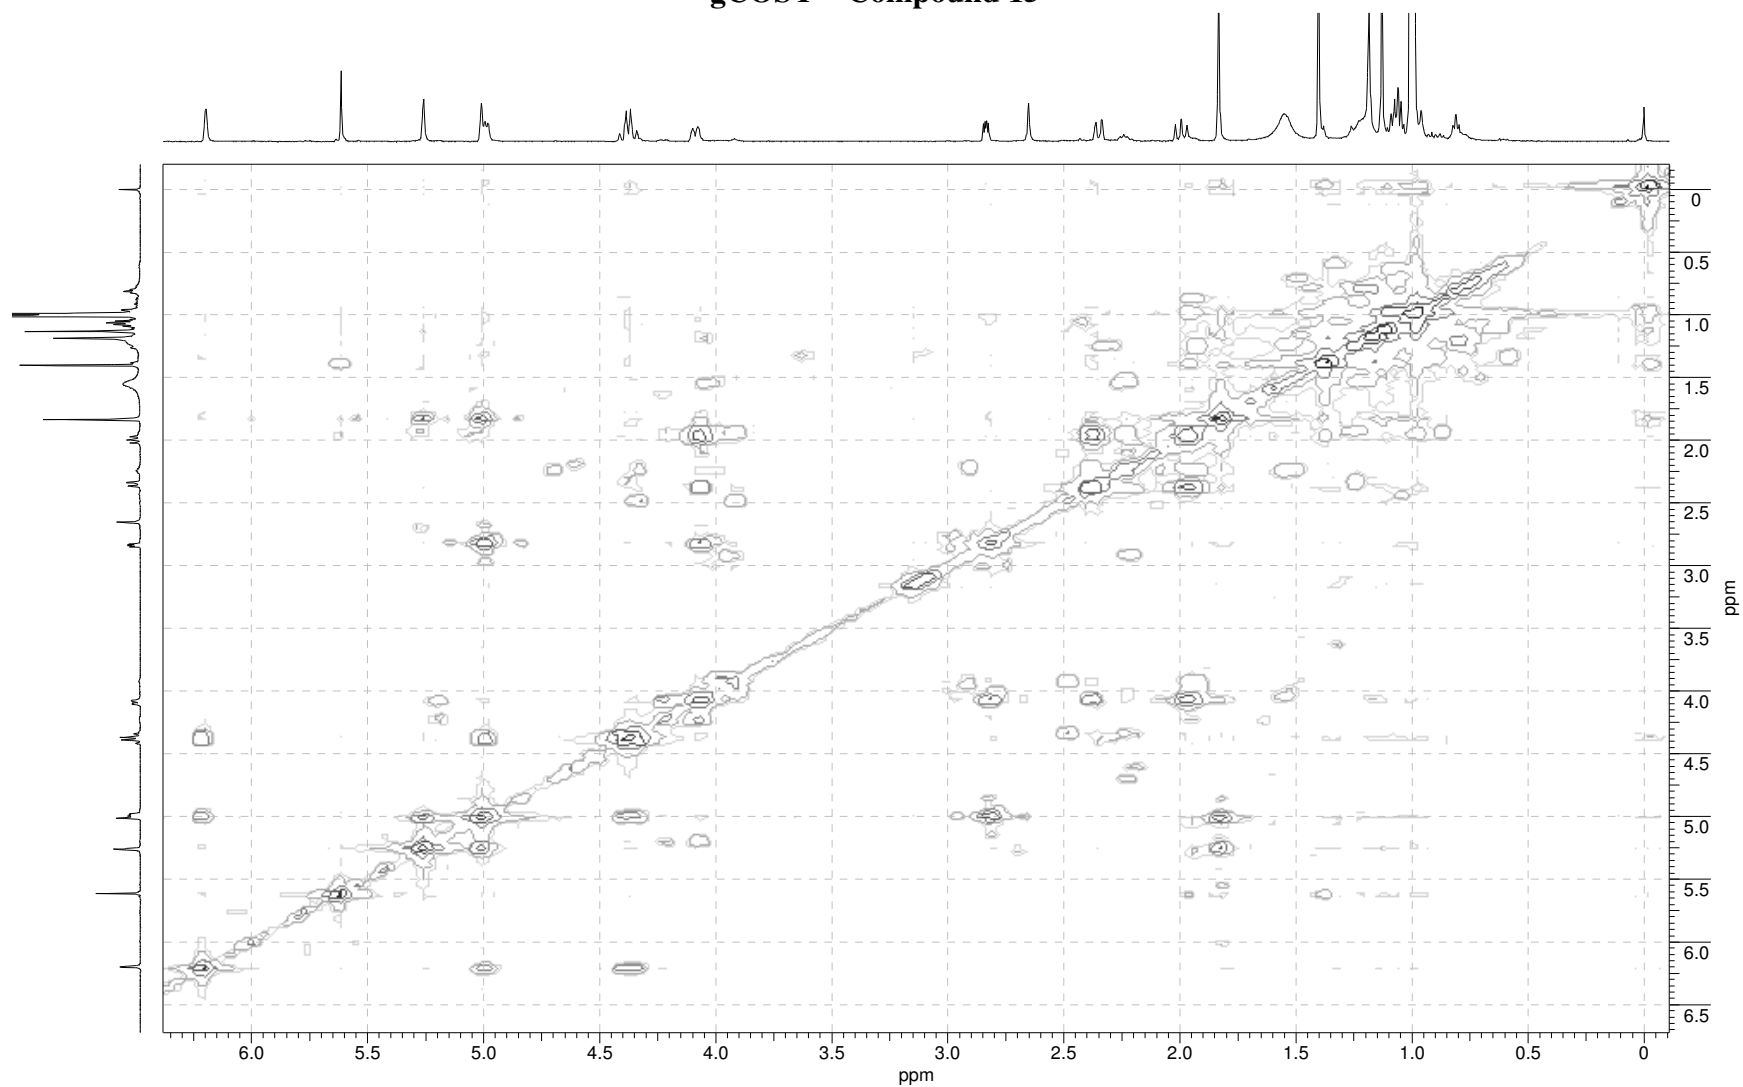

### gHMQC – Compound 15

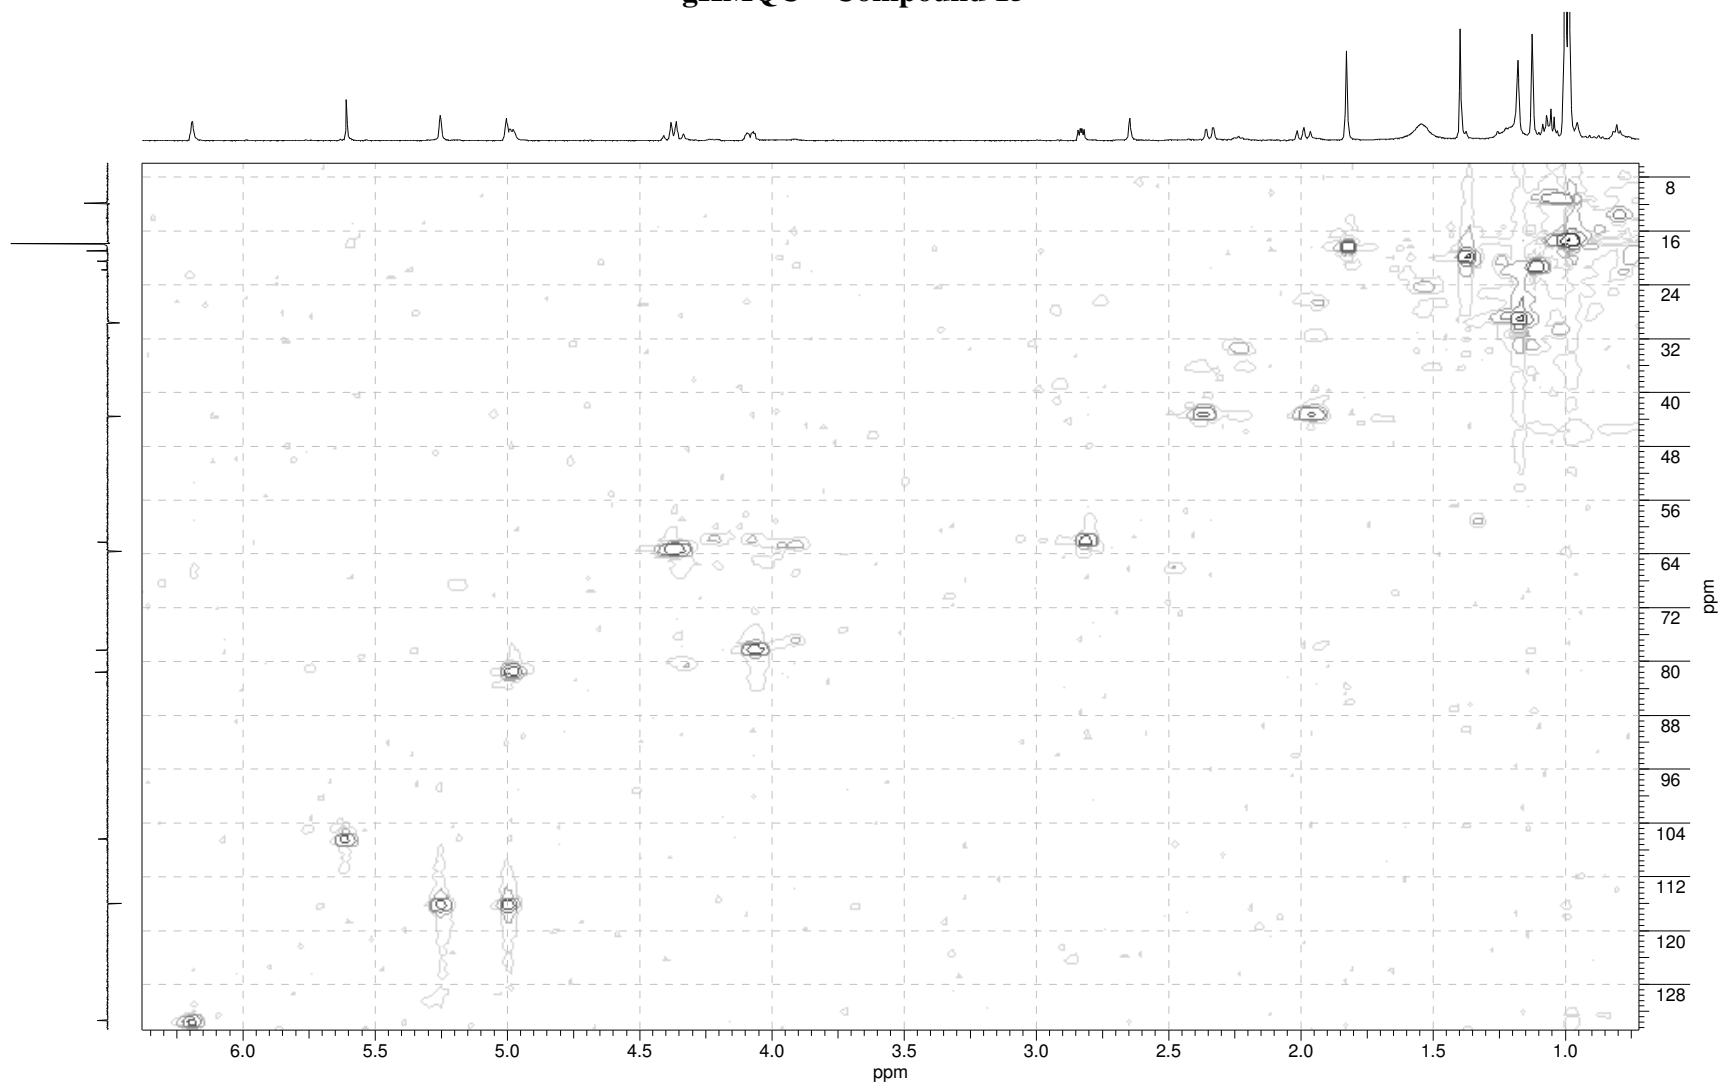

### gHMBC – Compound 15

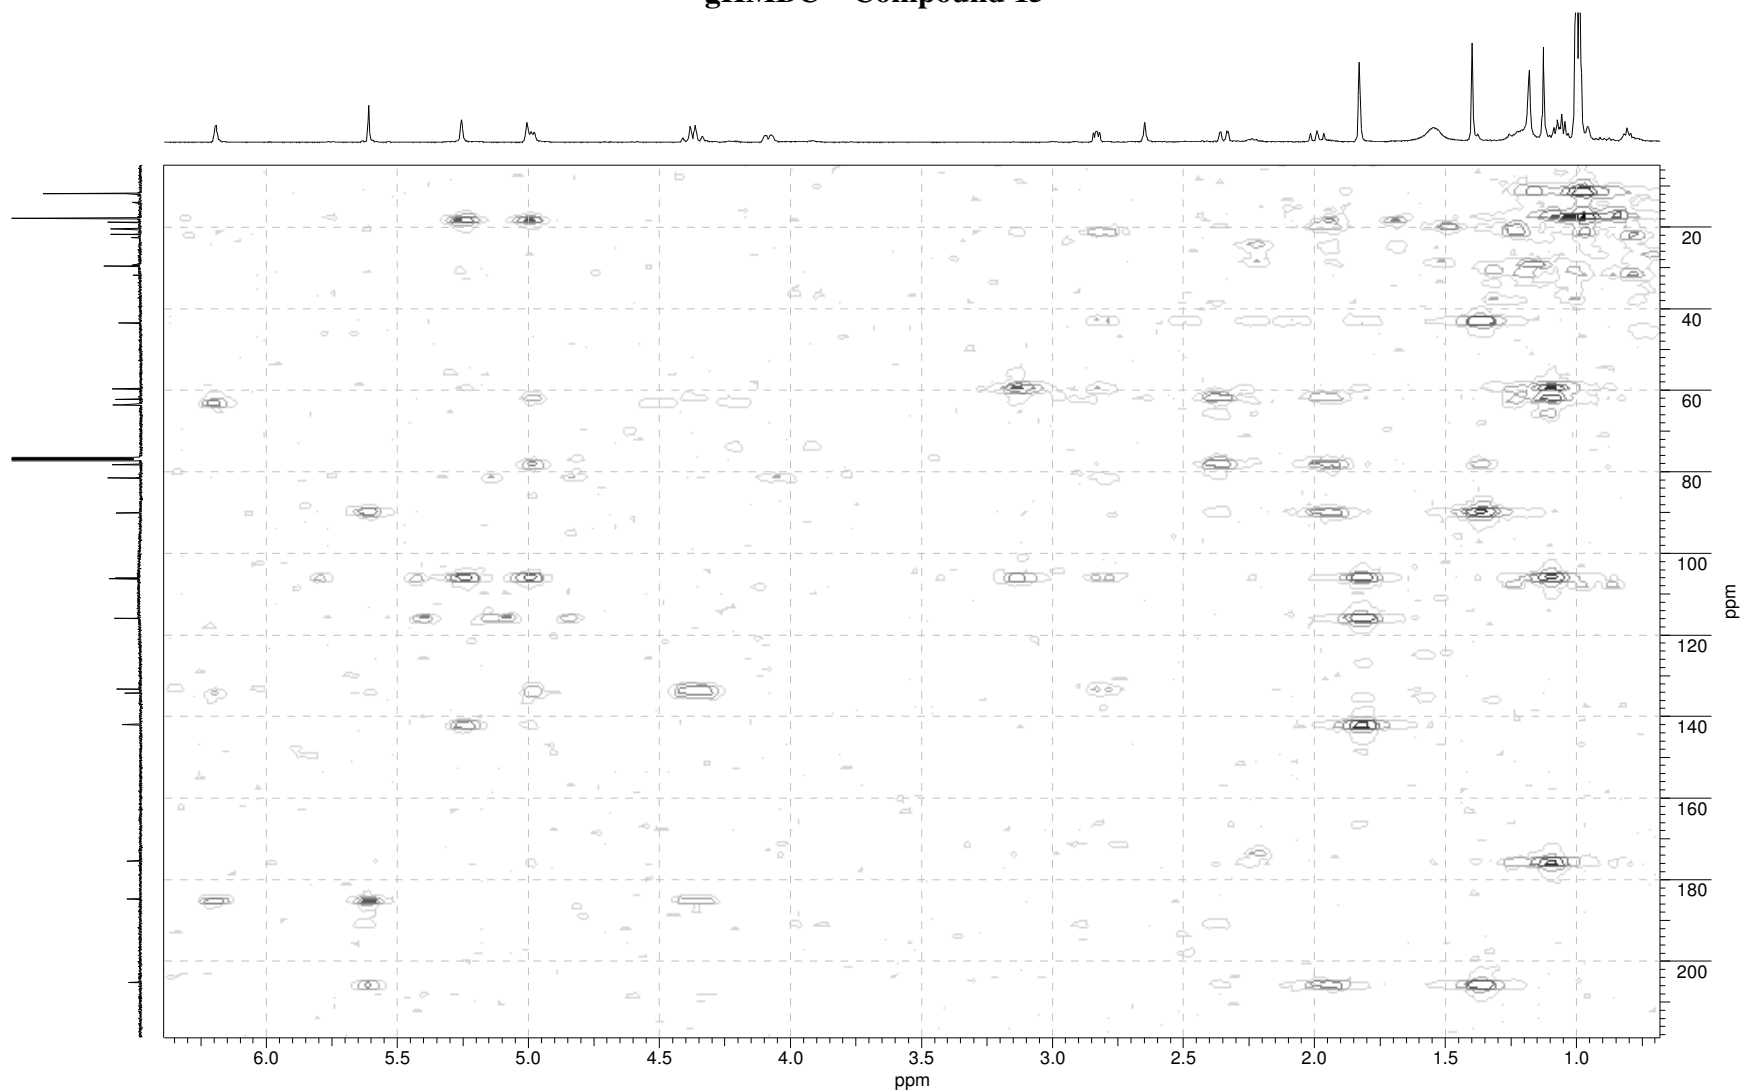

|                               |         |                               |                      |                              |              |
|-------------------------------|---------|-------------------------------|----------------------|------------------------------|--------------|
| <b>Acquisition Time (sec)</b> | 7.7070  | <b>Comment</b>                | Imported from UXMNR. |                              |              |
| <b>Frequency (MHz)</b>        | 500.13  |                               |                      |                              |              |
| <b>Nucleus</b>                | 1H      | <b>Number of Transients</b>   | 128                  | <b>Original Points Count</b> | 65536        |
| <b>Points Count</b>           | 32768   | <b>Pulse Sequence</b>         | zg30                 | <b>Solvent</b>               | CHLOROFORM-D |
| <b>Sweep Width (Hz)</b>       | 8503.40 | <b>Temperature (degree C)</b> | 27.000               |                              |              |

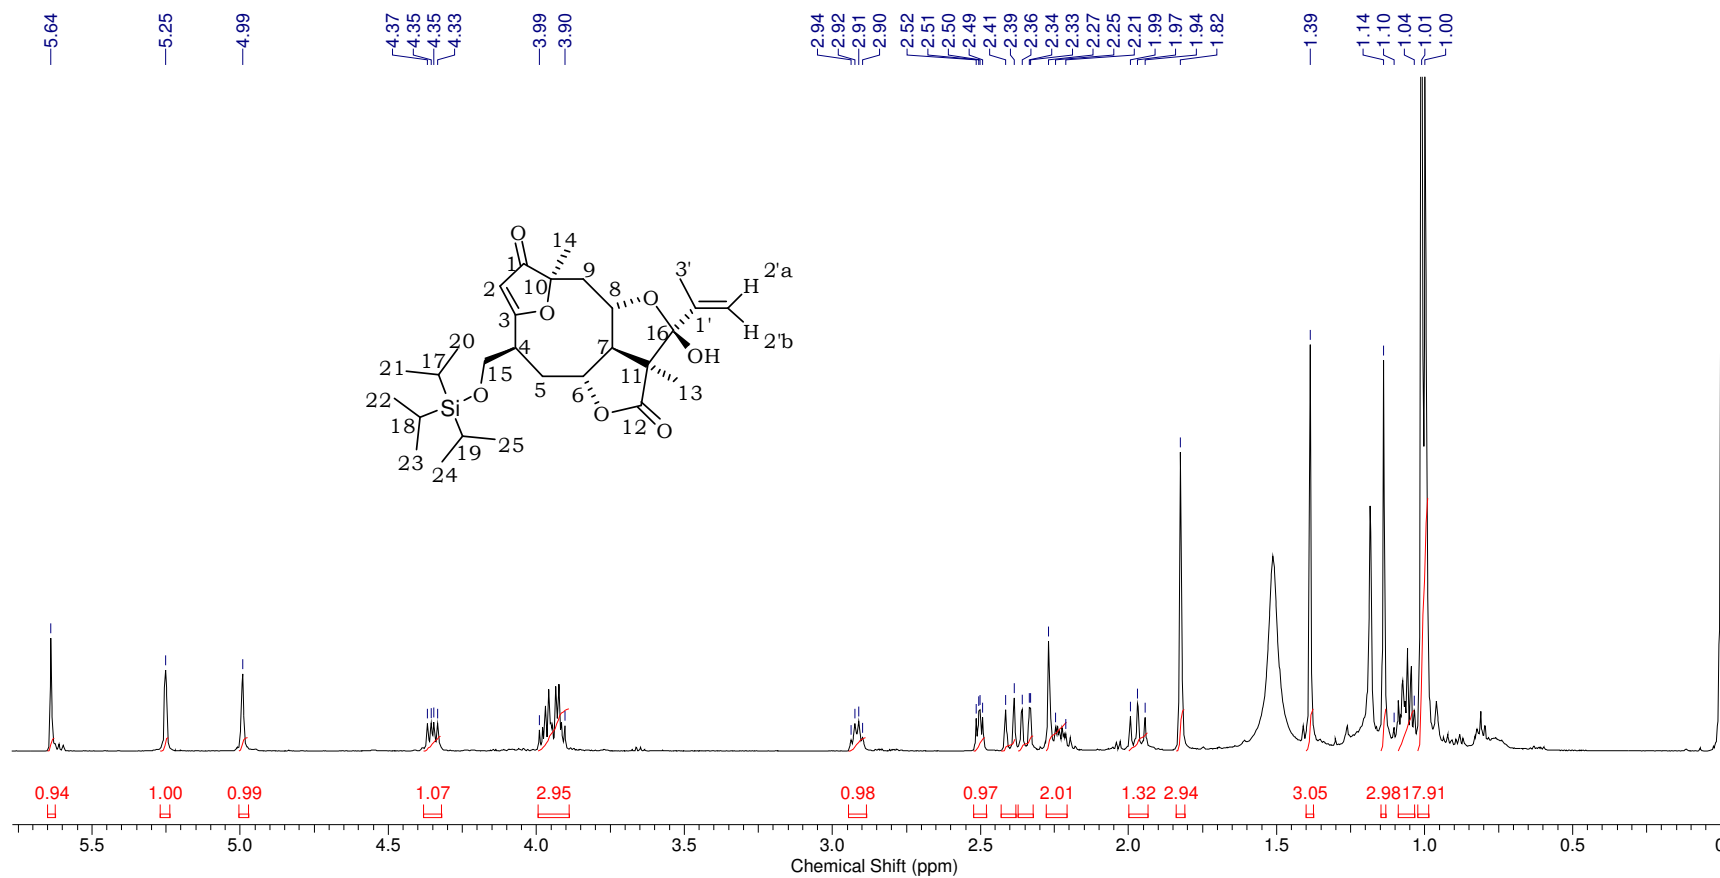

$^1\text{H}$  NMR (500 MHz) in  $\text{CDCl}_3$  of compound **16**.

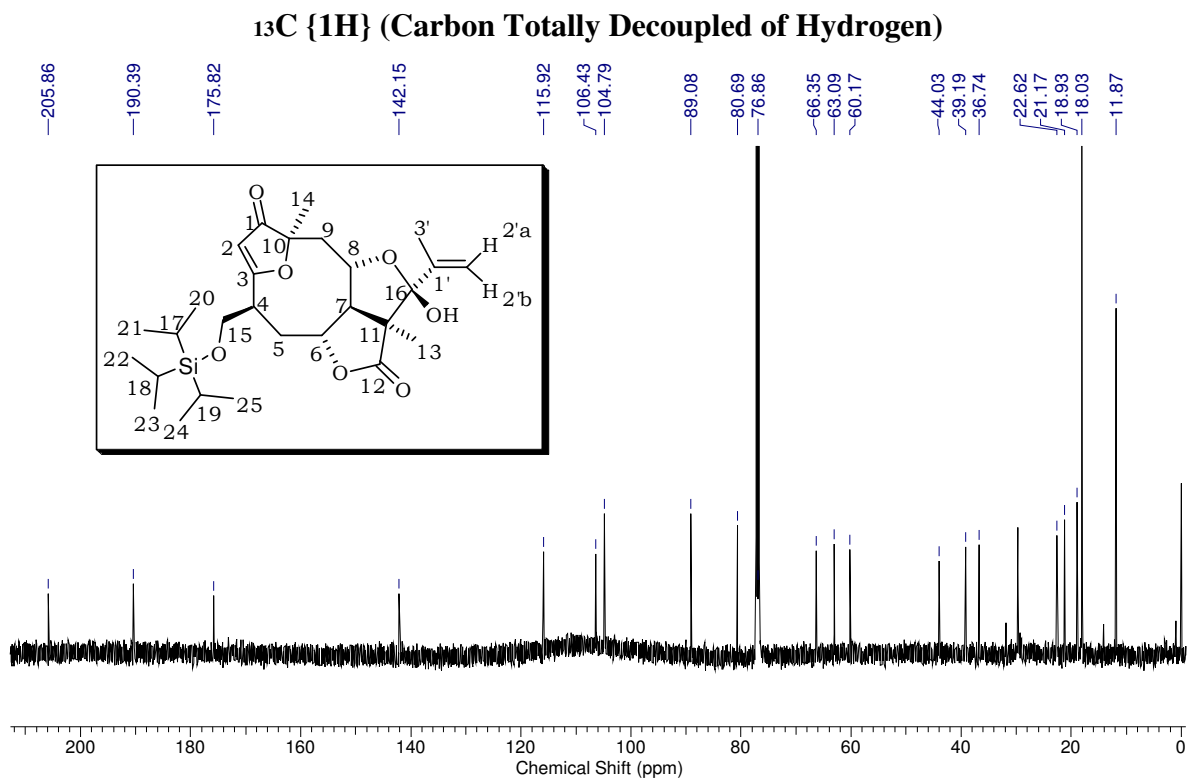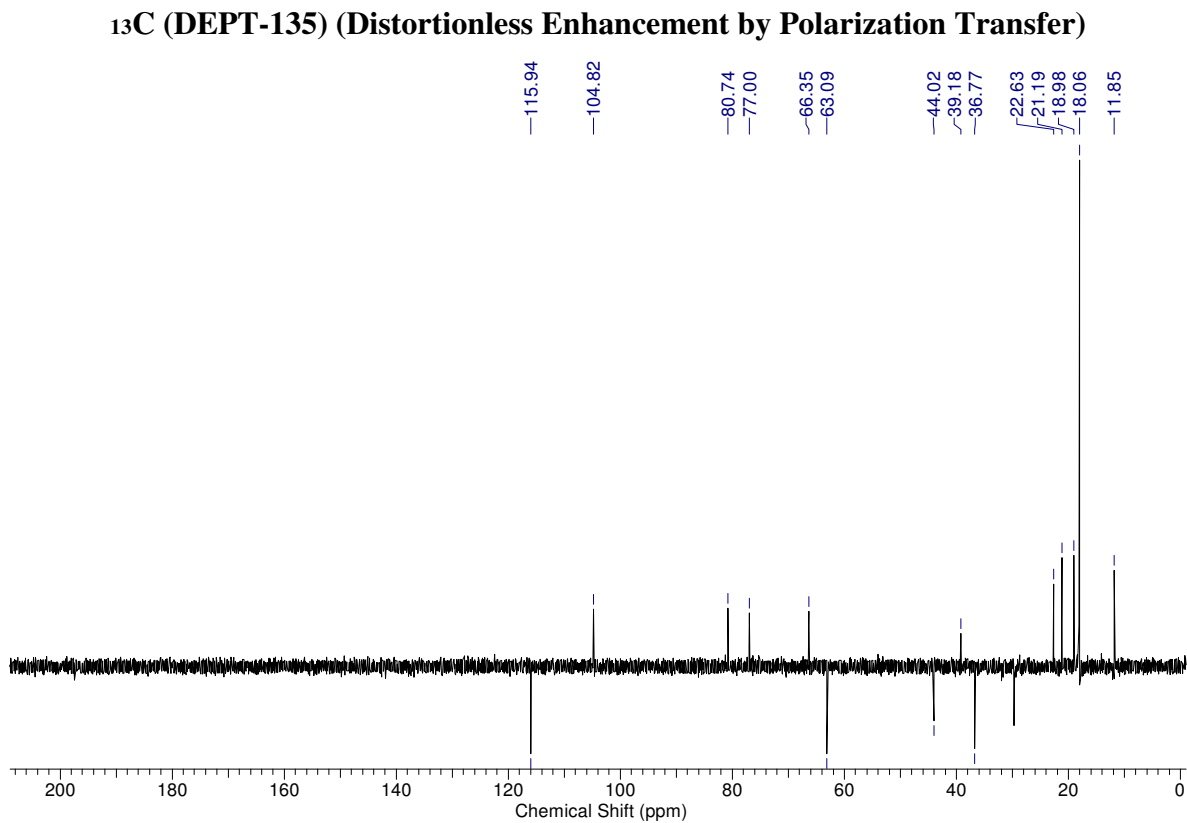

$^{13}\text{C}$  NMR (125 MHz) in  $\text{CDCl}_3$  of compound **16**.



### gCOSY – Compound 16

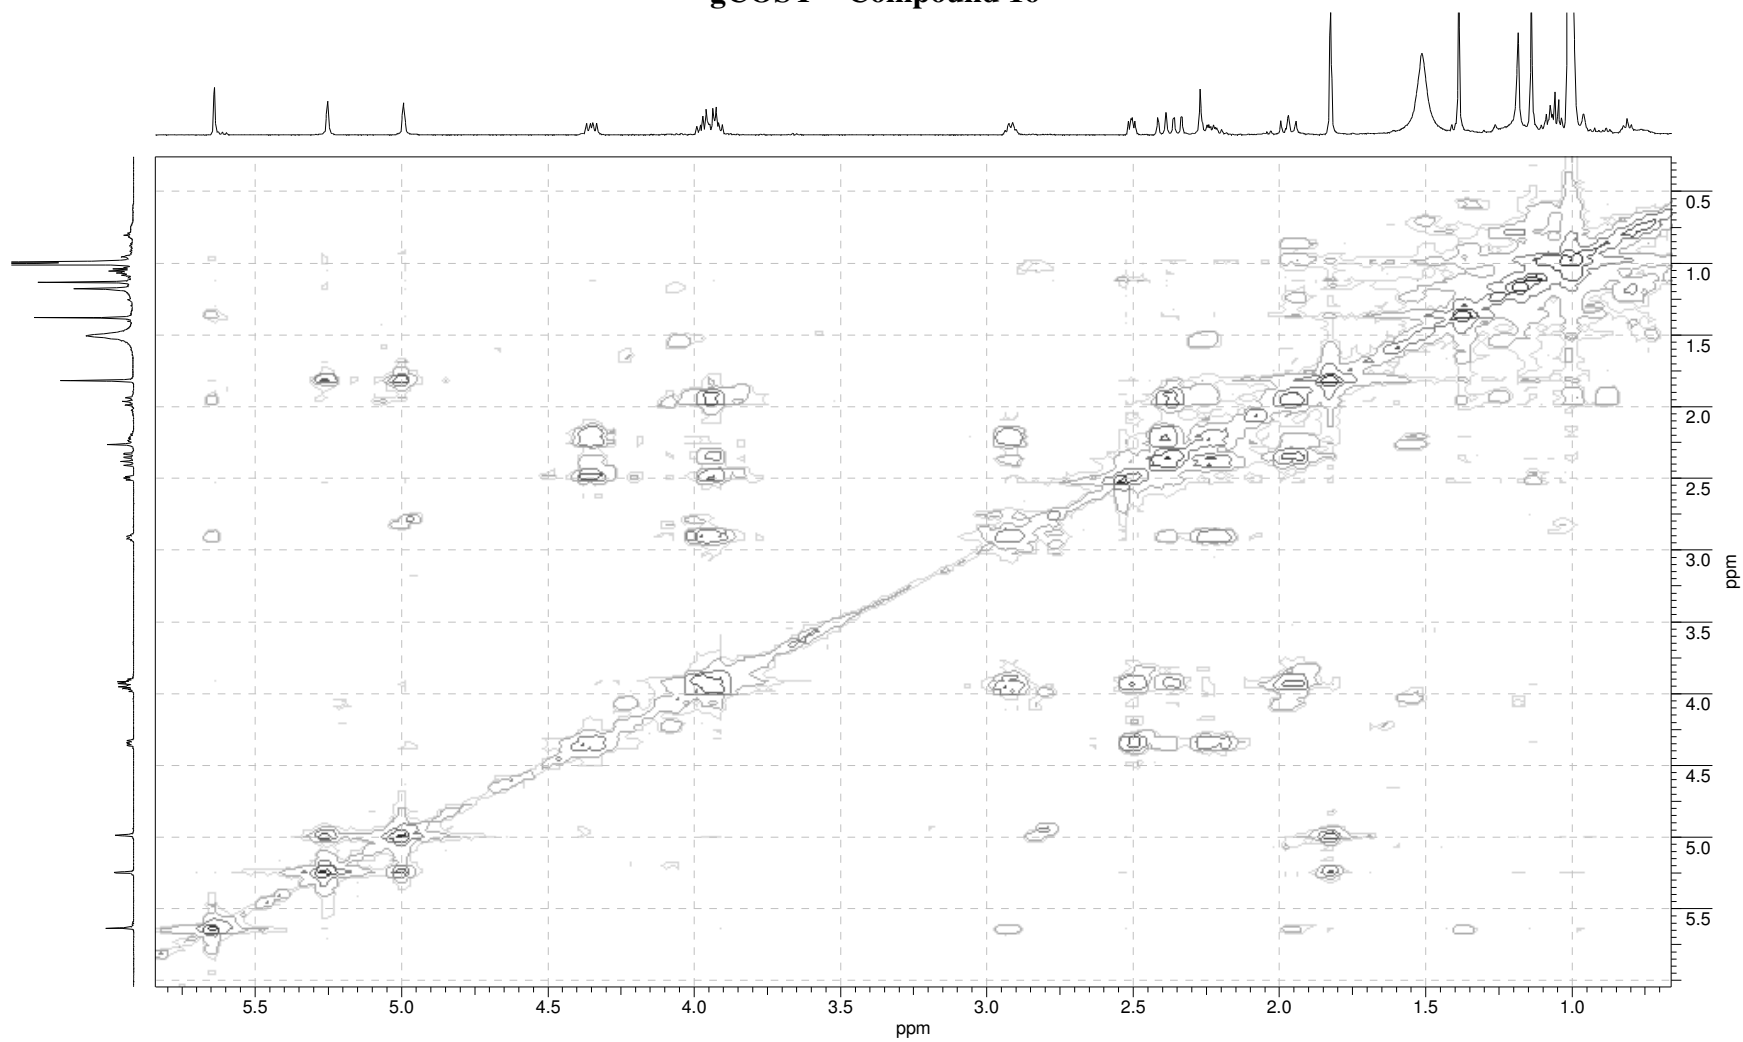

### gHMQC – Compound 16

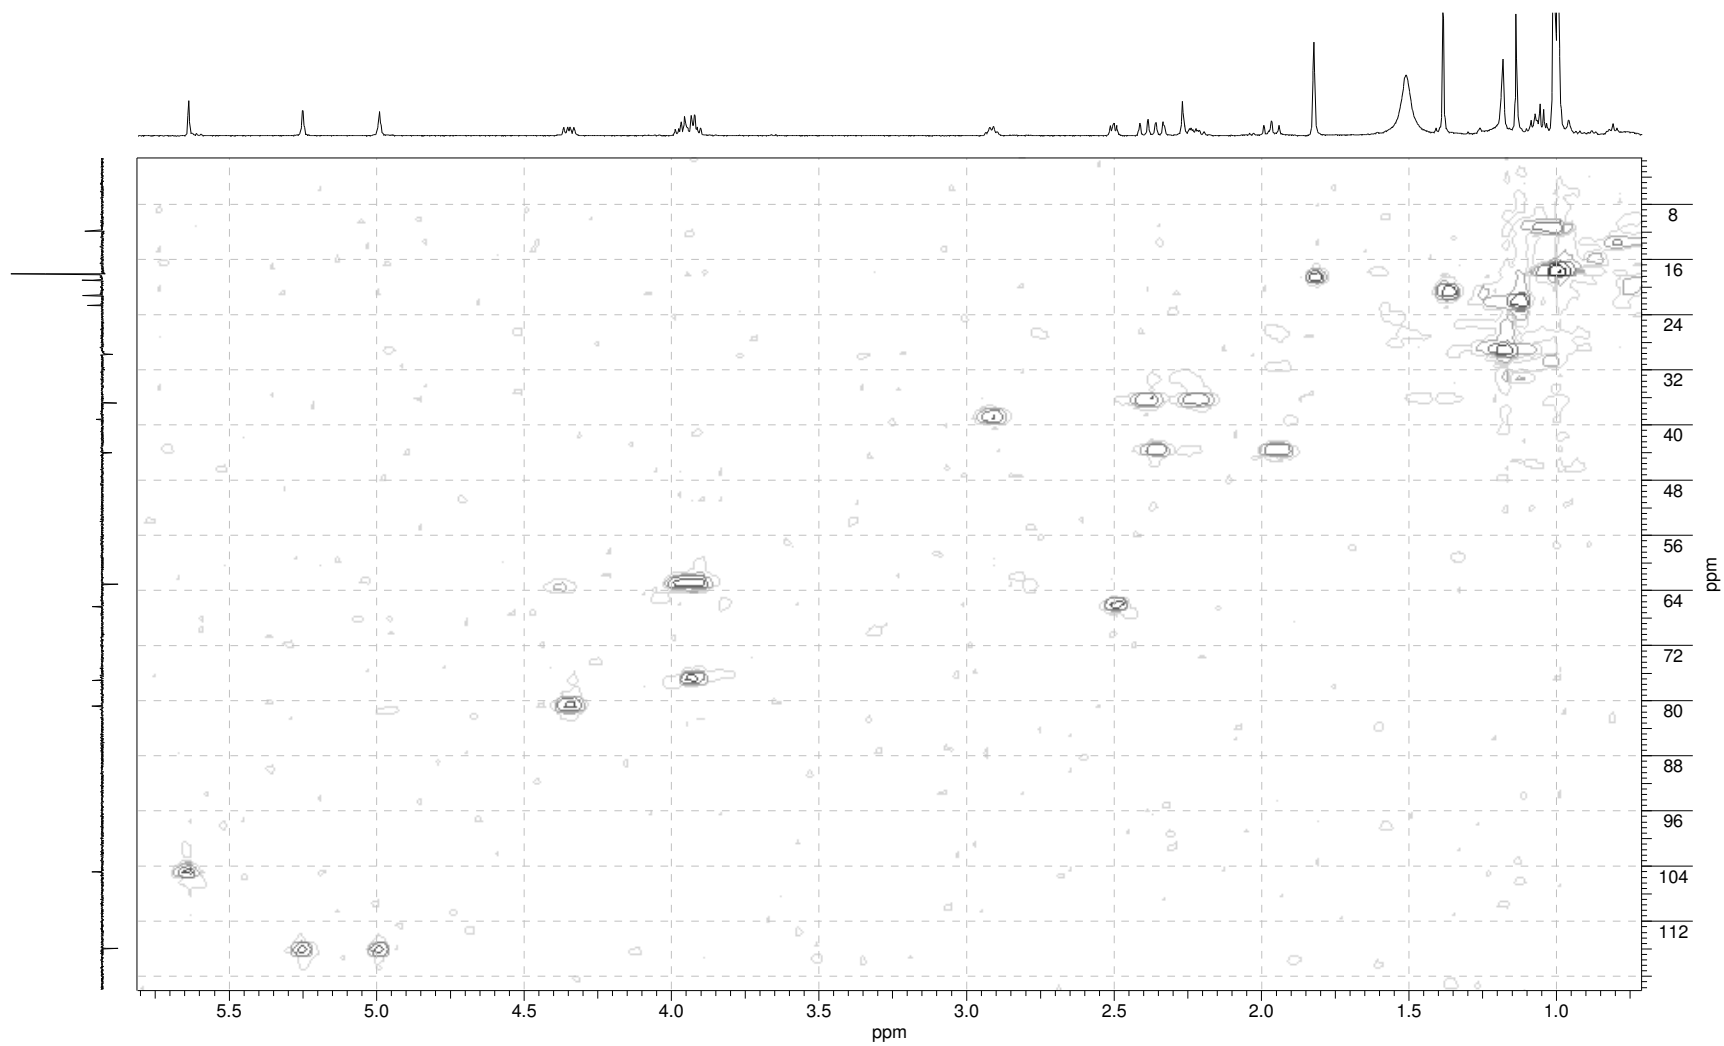

### gHMBC – Compound 16

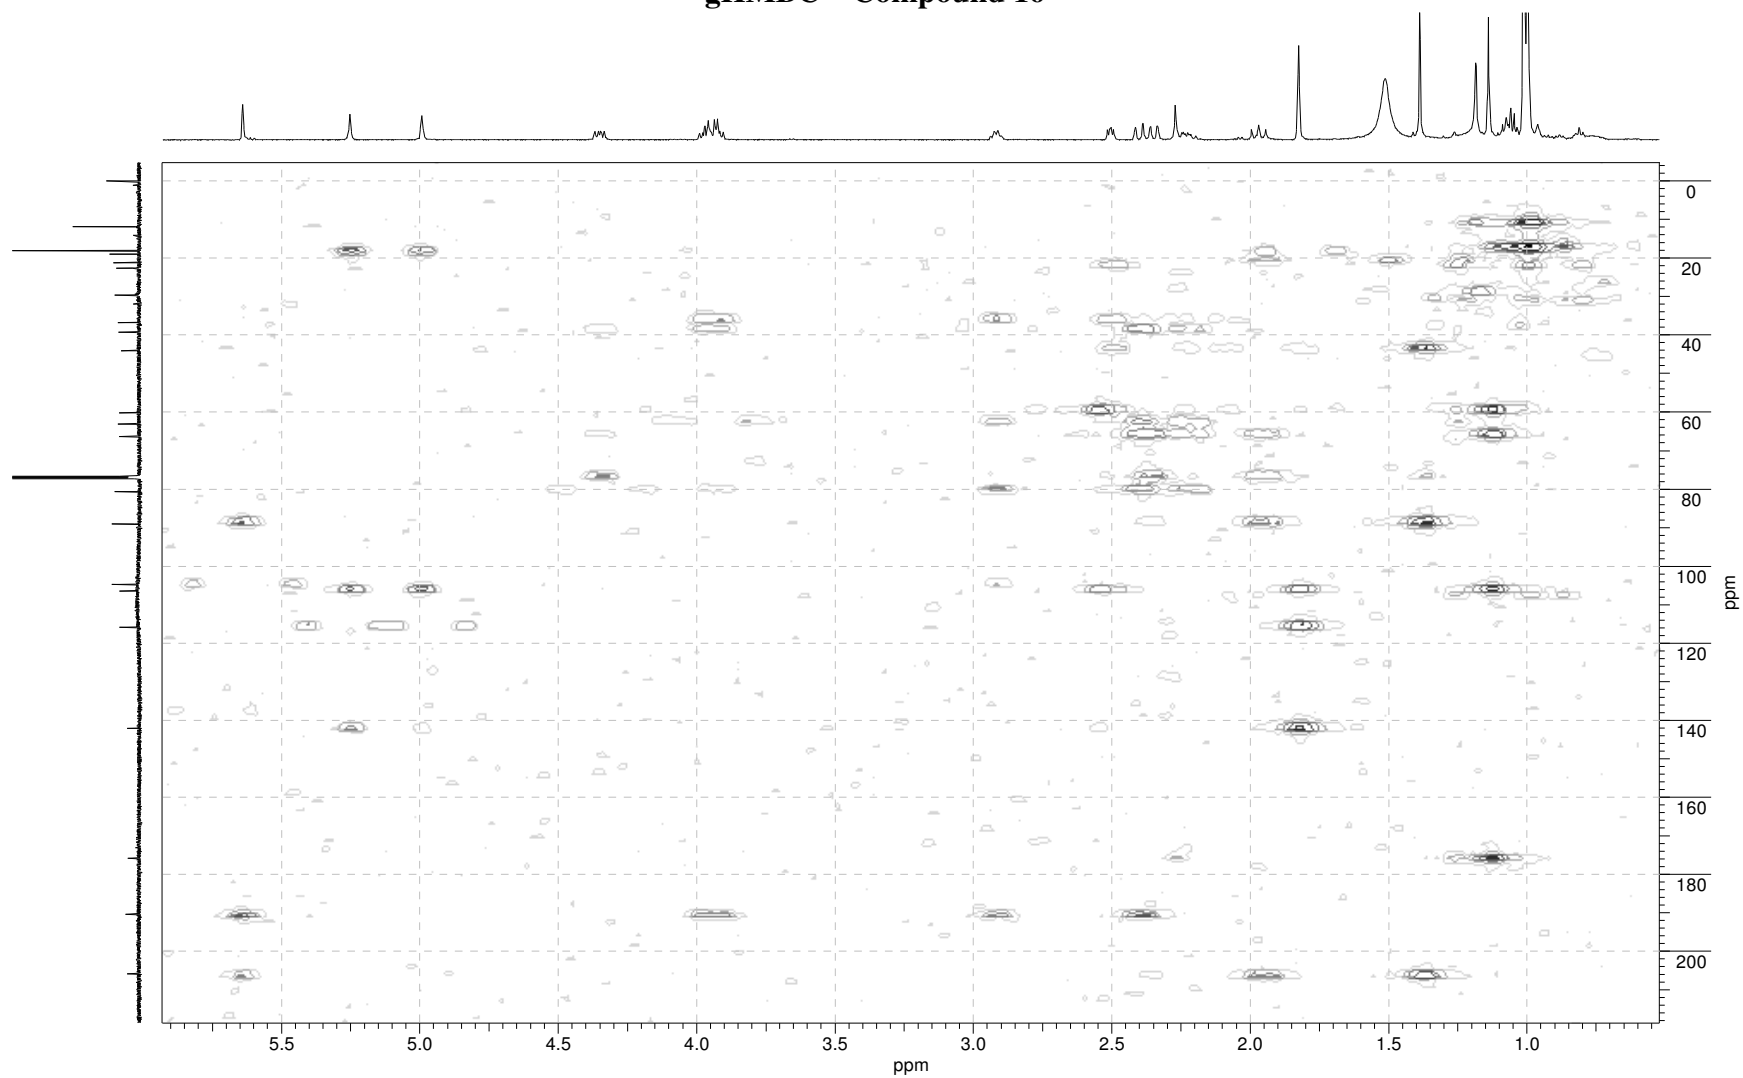

**gNOESY – Compound 16**

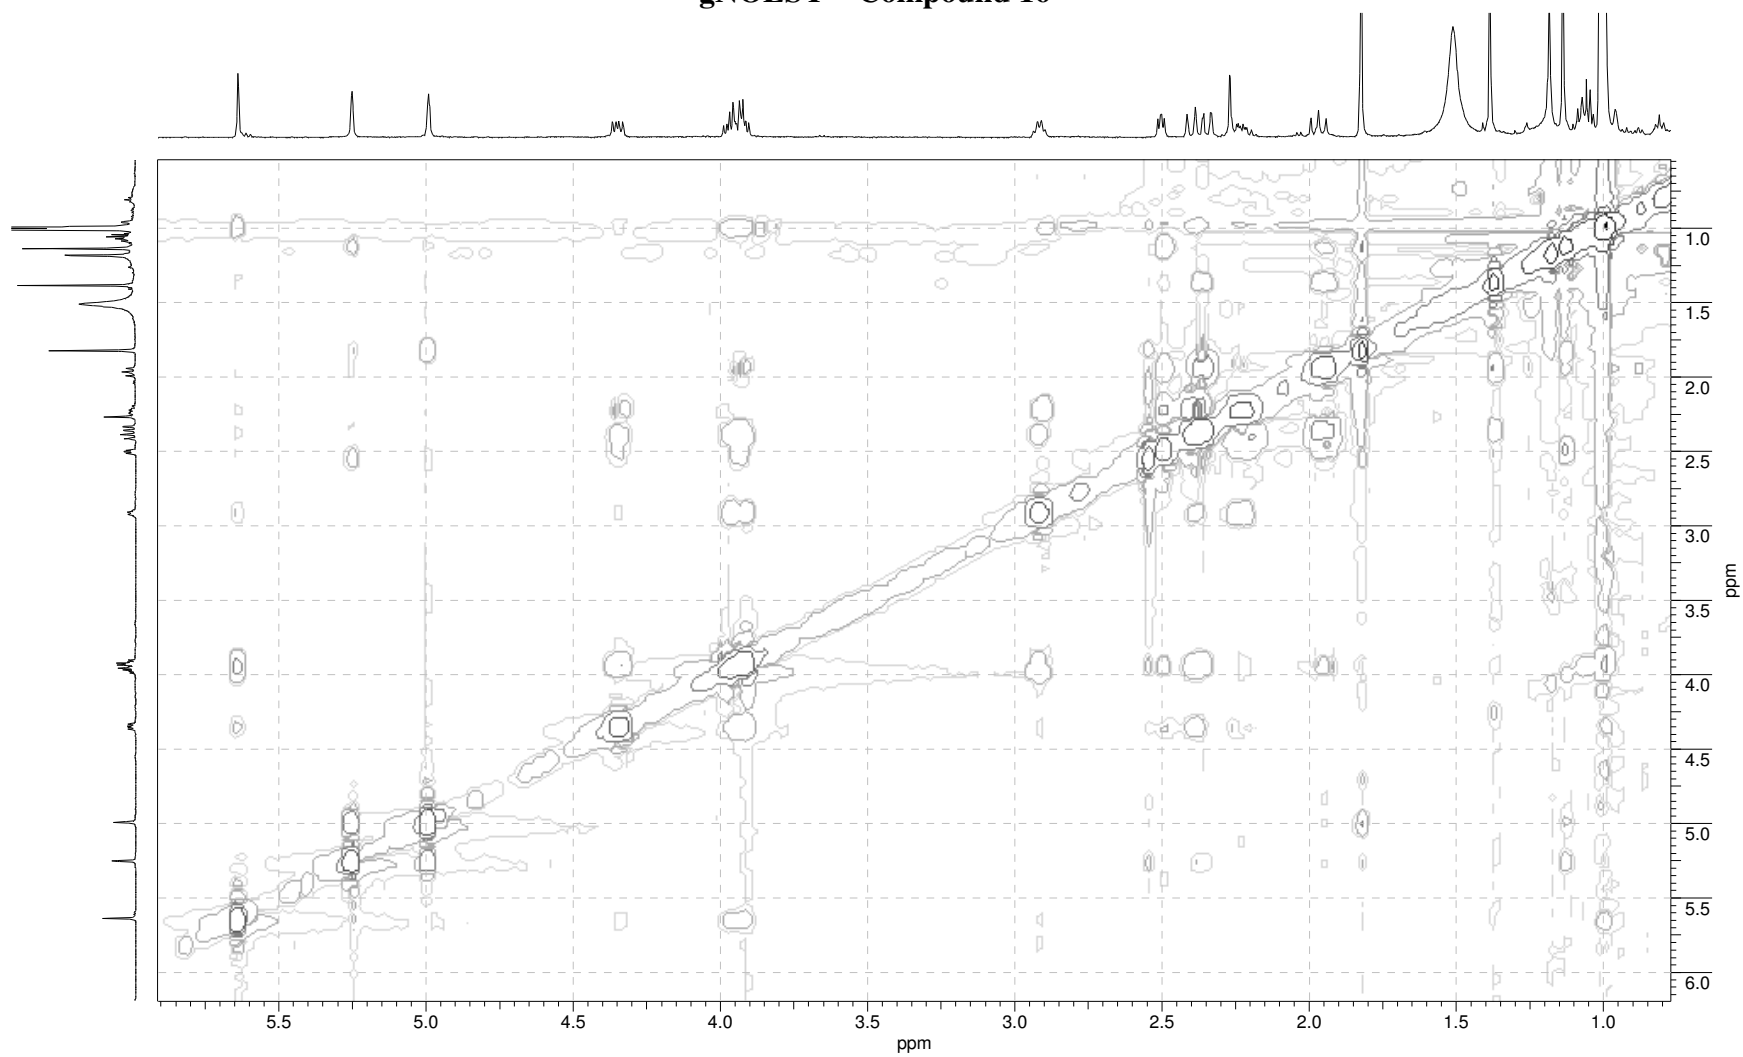

Supplement: c1ob05734k.pdf [file c1ob05734k.pdf]
